# Supplementary material for: Construction of the High-Density Genetic Linkage Map and Chromosome Map of Large Yellow Croaker (Larimichthys crocea)
Source: Int J Mol Sci. 2015 Nov 3;16(11):26237–48. doi: 10.3390/ijms161125951 (PMC4661810; doi:10.3390/ijms161125951)
Supplement: Supplementary file 1 [file ijms-16-25951-s001.xlsx]

## Sheet: Table S1
Table S1. Information about samples for completed RAD sequencing. All the statistics were produced by custom Perl scripts after finishing sequencing.
Sample	Total_read (M)	Total_base (M)	Coverage rate	GC content	Mean depth
2-1	12.4123	1042.63	0.1117	0.4079	9.6
2-2	14.0829	1182.96	0.1245	0.409	9.79
2-3	14.1374	1187.54	0.111	0.4073	10.97
2-4	12.6756	1064.75	0.117	0.4131	9.32
2-5	0.175182	14.7153	0.0127	0.4082	1.21
2-6	18.4051	1546.03	0.1407	0.4122	11.29
2-7	14.3381	1204.4	0.1117	0.411	11.08
2-8	14.9101	1252.45	0.1098	0.4108	11.71
2-9	1.25782	105.657	0.0494	0.4094	2.25
2-11	0.920674	77.3366	0.0392	0.4079	2.11
2-12	6.72038	564.512	0.0953	0.4116	6.05
2-13	11.923	1001.53	0.1124	0.407	9.21
2-14	4.2053	353.245	0.0832	0.41	4.32
2-15	12.3912	1040.86	0.1146	0.407	9.39
2-16	9.81696	824.625	0.0995	0.4111	8.49
2-17	9.97138	837.596	0.1031	0.4093	8.38
2-18	7.35473	617.797	0.1022	0.4076	6.27
2-19	12.3248	1035.28	0.1056	0.4104	10.08
2-20	12.0226	1009.9	0.1101	0.4087	9.43
2-21	14.2039	1193.13	0.1178	0.4075	10.48
2-22	11.0449	927.77	0.107	0.4069	8.95
2-23	15.0342	1262.87	0.1152	0.408	11.26
2-24	11.594	973.893	0.1116	0.4073	8.9
2-25	11.9951	1007.59	0.1084	0.4075	9.6
2-26	13.7264	1153.02	0.1188	0.4088	10.05
2-27	14.4161	1210.95	0.1055	0.4084	11.81
2-28	12.0609	1013.12	0.1166	0.4086	9.01
2-29	0.193226	16.231	0.0138	0.409	1.23
2-30	17.3337	1456.03	0.1213	0.411	12.5
2-31	15.0628	1265.27	0.1127	0.4086	11.68
2-32	13.655	1147.02	0.1099	0.4084	10.83
2-33	1.55069	130.258	0.0554	0.4081	2.49
2-35	1.1798	99.1029	0.0449	0.4068	2.35
2-36	14.5757	1224.36	0.1075	0.4076	11.75
2-37	10.6227	892.309	0.1086	0.407	8.47
2-38	11.7727	988.906	0.1073	0.4071	9.49
2-39	10.6516	894.731	0.1044	0.4069	8.86
2-41	9.26486	778.248	0.1036	0.4074	7.83
2-43	9.86601	828.745	0.1028	0.4067	8.36
2-44	7.86507	660.666	0.0968	0.4071	7.13
2-45	10.8342	910.069	0.1007	0.4078	9.4
2-46	10.5973	890.173	0.1055	0.4072	8.76
2-47	10.9379	918.786	0.0999	0.411	9.53
2-49	8.63949	725.717	0.099	0.4085	7.69
2-51	10.2634	862.128	0.105	0.4081	8.54
2-52	10.1651	853.87	0.103	0.4073	8.57
2-53	12.4303	1044.15	0.1099	0.4083	9.87
2-54	12.9911	1091.26	0.1243	0.4088	9.08
2-55	9.36775	786.891	0.107	0.4072	7.65
2-56	9.0756	762.35	0.1134	0.4086	7.01
2-58	0.065254	5.48134	0.0048	0.4081	1.2
2-59	13.551	1138.28	0.1186	0.4147	9.94
2-61	14.0026	1176.22	0.1159	0.4098	10.59
2-63	14.5959	1226.05	0.1172	0.4091	10.81
2-64	1.20379	101.118	0.0492	0.4084	2.2
2-66	0.94516	79.3934	0.0384	0.4066	2.22
2-67	15.1393	1271.71	0.1176	0.4083	11.16
2-68	11.4993	965.938	0.1127	0.4072	8.83
2-69	10.7522	903.181	0.1028	0.4106	9.08
2-70	9.92839	833.985	0.1106	0.4076	7.79
2-71	9.45038	793.832	0.1078	0.4076	7.66
2-72	10.3257	867.357	0.1089	0.4072	8.26
2-73	6.53273	548.749	0.0913	0.4128	6.22
2-74	9.20728	773.412	0.1072	0.4067	7.5
2-77	9.1818	771.271	0.1087	0.4072	7.38
2-79	14.1408	1187.82	0.1234	0.4077	9.95
2-80	10.7689	904.586	0.1123	0.4072	8.33
2-81	11.686	981.626	0.1201	0.4079	8.4
2-84	10.7315	901.45	0.1163	0.4081	7.99
2-85	10.5694	887.832	0.102	0.4073	9.04
2-86	12.5043	1050.36	0.1163	0.4083	9.28
2-87	10.383	872.175	0.1	0.4065	8.99
2-88	9.07585	762.371	0.1082	0.4078	7.3
2-90	0.080748	6.78283	0.006	0.4052	1.19
2-91	14.784	1241.86	0.1198	0.4099	10.77
2-92	12.4002	1041.62	0.1098	0.4081	9.87
2-93	15.8254	1329.34	0.1104	0.408	12.43
2-95	1.1866	99.6744	0.0473	0.4074	2.24
2-97	0.978906	82.2281	0.0383	0.4055	2.3
2-98	13.8232	1161.15	0.1068	0.4078	11.22
2-99	12.5232	1051.95	0.1059	0.4069	10.17
2-100	15.1113	1269.35	0.1043	0.4087	12.43
2-101	12.5251	1052.11	0.11	0.4068	9.79
2-102	10.3514	869.519	0.0995	0.407	9.09
2-103	11.7018	982.954	0.0976	0.4084	10.35
2-104	7.46071	626.7	0.091	0.41	7.1
2-105	8.47605	711.988	0.102	0.4068	7.15
2-106	14.3059	1201.69	0.1066	0.4071	11.59
2-107	13.379	1123.83	0.1037	0.4092	11.17
2-108	11.3903	956.783	0.1016	0.4066	9.67
2-109	14.2982	1201.05	0.1108	0.4075	11.09
2-110	11.3643	954.598	0.1088	0.4071	8.96
2-111	8.50915	714.769	0.0959	0.4072	5.3
2-112	10.9773	922.09	0.1174	0.4099	5.51
2-114	9.50608	798.511	0.0963	0.4072	5.93
2-115	9.73419	817.672	0.1067	0.4088	5.47
2-116	0.073352	6.16157	0.0044	0.4073	1.15
2-117	15.8387	1330.45	0.1277	0.4124	7.88
2-118	15.9343	1338.48	0.1142	0.4091	8.56
2-119	14.5913	1225.67	0.1081	0.4086	8.19
2-120	0.862758	72.4717	0.0393	0.4093	1.88
2-122	0.690852	58.0316	0.0317	0.4078	1.89
2-123	12.1665	1021.98	0.101	0.4083	7.14
2-125	12.2693	1030.62	0.0961	0.4104	7.52
2-126	10.7122	899.827	0.1014	0.4067	6.27
2-127	9.57962	804.688	0.0982	0.4069	5.81
2-128	10.1457	852.241	0.0977	0.4078	6.19
2-129	10.5111	882.932	0.0933	0.4104	6.64
2-130	7.00309	588.26	0.0929	0.4079	4.5
2-131	10.2866	864.075	0.0973	0.4068	6.3
2-134	4.87834	409.78	0.0799	0.4068	3.66
2-135	15.8499	1331.39	0.1107	0.408	8.48
2-136	11.0523	928.393	0.1001	0.4078	6.53
2-137	12.7807	1073.58	0.1111	0.4082	6.8
2-138	11.8264	993.419	0.1083	0.4084	6.4
2-139	16.8965	1419.31	0.1135	0.4081	12.95
2-140	18.8348	1582.12	0.1224	0.4072	13.28
2-141	12.2118	1025.79	0.1211	0.4147	8.64
2-142	16.5797	1392.7	0.1134	0.4129	12.54
2-143	24.352	2045.57	0.1357	0.4089	15.46
2-144	17.972	1509.65	0.1263	0.4087	12.28
2-145	20.0571	1684.8	0.1174	0.4115	14.59
2-146	18.013	1513.09	0.1251	0.4066	12.47
2-147	18.095	1519.98	0.1363	0.4072	11.52
2-148	14.4599	1214.63	0.1216	0.408	10.34
C	16.2349	1363.73	0.0957	0.4071	7.38
X1	24.6214	2068.2	0.1137	0.4084	9.58
X2	10.604	1646.73	0.1138	0.4091	7.48

## Sheet: Table S2
Table S2. Information about the SNP linkage map of large yellow croaker. The data were produced by using the order markers module of Lep-MAP
Linkage Groups	Markers	Position(cM)	Error Estimate
LG1	scaffold388-527087	0	0
LG1	scaffold522-62894	2.43	0.0082
LG1	scaffold522-62930	2.43	0.0082
LG1	scaffold143-198604	2.43	0
LG1	scaffold418-129363	4.03	0
LG1	scaffold342-332891	9.14	0.0229
LG1	scaffold9-816683	9.14	0.0232
LG1	scaffold143-738389	10.77	0.0569
LG1	scaffold466-230425	10.77	0.0393
LG1	scaffold256-166192	10.77	0.0233
LG1	scaffold298-1163924	11.58	0.0246
LG1	scaffold143-605817	11.58	0.0417
LG1	scaffold284-502144	11.58	0.0166
LG1	scaffold239-425530	12.38	0.0488
LG1	scaffold143-115687	12.38	0.0242
LG1	scaffold215-213222	13.99	0
LG1	scaffold143-691185	14.77	0.0163
LG1	scaffold284-502218	14.77	0.016
LG1	scaffold9-1159865	14.77	0.0246
LG1	scaffold466-196554	15.56	0.0081
LG1	scaffold522-318050	15.56	0.0397
LG1	scaffold284-263388	16.34	0.0232
LG1	scaffold143-166051	16.34	0.0584
LG1	scaffold184-171450	17.14	0.0239
LG1	scaffold115-1027508	17.92	0.0079
LG1	scaffold284-118274	17.92	0.0081
LG1	scaffold143-99423	17.92	0.0328
LG1	scaffold342-583562	17.92	0.0244
LG1	scaffold9-1117371	17.92	0.048
LG1	scaffold32-939422	17.92	0.0164
LG1	scaffold342-375600	17.92	0.0397
LG1	scaffold256-273642	17.92	0.0081
LG1	scaffold143-181975	18.7	0.0413
LG1	scaffold298-726610	18.7	0.024
LG1	scaffold256-706515	18.7	0
LG1	scaffold375-296398	18.7	0
LG1	scaffold522-354644	19.49	0.0431
LG1	scaffold9-546334	20.27	0.0165
LG1	scaffold129-940635	21.06	0.0159
LG1	scaffold239-737851	21.06	0.0321
LG1	scaffold949-4166	22.65	0
LG1	scaffold129-765904	24.23	0.0403
LG1	scaffold239-198250	24.23	0.0157
LG1	scaffold129-62184	24.23	0.0313
LG1	scaffold342-90339	24.23	0.0543
LG1	scaffold256-240963	24.23	0.0325
LG1	scaffold239-198249	24.23	0.0236
LG1	scaffold129-214685	24.23	0.0325
LG1	scaffold322-255210	24.23	0.0082
LG1	scaffold175-587258	24.23	0.0157
LG1	scaffold466-288003	24.23	0.0159
LG1	scaffold129-521079	24.23	0.0233
LG1	scaffold129-944272	24.23	0.008
LG1	scaffold239-405195	24.23	0.0574
LG1	scaffold121-278775	24.23	0.0078
LG1	scaffold322-156057	24.99	0.0553
LG1	scaffold9-317689	26.54	0
LG1	scaffold522-198028	26.54	0.0248
LG1	scaffold418-141959	26.54	0.0161
LG1	scaffold9-789651	26.54	0.0333
LG1	scaffold143-382911	29.91	0.017
LG1	scaffold256-283694	31.54	0.008
LG1	scaffold143-973093	31.54	0.016
LG1	scaffold298-1202172	31.54	0.0154
LG1	scaffold322-74170	32.35	0.024
LG1	scaffold121-86419	33.15	0.0081
LG1	scaffold121-690140	33.94	0.0416
LG1	scaffold121-69380	34.73	0.0079
LG1	scaffold121-69392	34.73	0
LG1	scaffold121-966675	36.34	0.0239
LG1	scaffold418-266425	37.11	0.016
LG1	scaffold143-973187	37.11	0.0244
LG1	scaffold322-253615	37.11	0.008
LG1	scaffold322-286533	37.9	0.0242
LG1	scaffold322-253810	37.9	0
LG1	scaffold666-91614	38.68	0.0163
LG1	scaffold466-219991	39.49	0.0082
LG1	scaffold284-55412	39.49	0.0235
LG1	scaffold129-873520	45.24	0
LG1	scaffold129-728842	46.03	0.0328
LG1	scaffold388-378804	46.03	0.0403
LG1	scaffold129-873719	46.82	0.0079
LG1	scaffold239-141135	48.42	0
LG1	scaffold239-141072	48.42	0.0078
LG1	scaffold322-111026	49.2	0.0242
LG1	scaffold669-122279	49.2	0
LG1	scaffold129-900288	49.98	0.0157
LG1	scaffold129-721550	49.98	0
LG1	scaffold129-854345	49.98	0
LG1	scaffold466-227719	49.98	0
LG1	scaffold239-234279	49.98	0.0159
LG1	scaffold129-642861	49.98	0.0312
LG1	scaffold239-527174	49.98	0.082
LG1	scaffold666-84737	49.98	0.0312
LG1	scaffold322-109656	49.98	0
LG1	scaffold239-129695	49.98	0.008
LG1	scaffold121-182471	50.76	0.0167
LG1	scaffold121-332975	50.76	0
LG1	scaffold239-603541	50.76	0
LG1	scaffold239-730350	50.76	0.0157
LG1	scaffold89-1252485	50.76	0.0397
LG1	scaffold121-173091	50.76	0.024
LG1	scaffold121-218056	50.76	0.0078
LG1	scaffold121-952447	50.76	0.0157
LG1	scaffold239-665767	50.76	0.016
LG1	scaffold121-86514	51.54	0.0159
LG1	scaffold121-278810	51.54	0.0159
LG1	scaffold121-237316	53.11	0.0078
LG1	scaffold121-569281	53.11	0.0492
LG1	scaffold322-478238	54.67	0.0249
LG1	scaffold129-622106	54.67	0.0169
LG1	scaffold322-17759	55.46	0.0247
LG1	scaffold129-40813	57.06	0.008
LG1	scaffold239-206958	57.06	0.0164
LG1	scaffold143-464679	57.06	0.0333
LG1	scaffold466-261549	57.06	0.0237
LG1	scaffold129-551491	58.61	0.0396
LG1	scaffold1454-2635	58.61	0.0155
LG1	scaffold322-264335	58.61	0.0242
LG1	scaffold375-253920	59.4	0.0083
LG1	scaffold284-187100	59.4	0.0234
LG1	scaffold522-34634	60.18	0.008
LG1	scaffold121-618225	60.18	0.0325
LG1	scaffold143-1023744	60.18	0.0397
LG1	scaffold692-187807	60.97	0.0078
LG1	scaffold298-947320	61.76	0.0078
LG1	scaffold388-240345	61.76	0.0078
LG1	scaffold284-422665	61.76	0.0078
LG1	scaffold388-379050	61.76	0.0078
LG1	scaffold522-290409	61.76	0.016
LG1	scaffold418-345718	61.76	0.0394
LG1	scaffold9-641290	63.33	0.0079
LG1	scaffold418-230485	63.33	0
LG1	scaffold418-277384	64.11	0
LG1	scaffold375-254120	64.11	0
LG1	scaffold692-150875	64.11	0.0159
LG1	scaffold9-671149	64.11	0.0079
LG1	scaffold298-1247134	64.9	0.0081
LG1	scaffold256-741692	65.69	0.0078
LG1	scaffold388-192997	65.69	0.0081
LG1	scaffold256-133520	65.69	0.0157
LG1	scaffold342-600265	65.69	0
LG1	scaffold322-29264	65.69	0.0081
LG1	scaffold692-165064	65.69	0.016
LG1	scaffold692-225664	67.26	0
LG1	scaffold375-418259	67.26	0.0155
LG1	scaffold256-635250	67.26	0.0155
LG1	scaffold388-105347	68.05	0
LG1	scaffold143-568608	68.05	0
LG1	scaffold9-790106	68.05	0
LG1	scaffold9-61983	68.05	0
LG1	scaffold342-69020	68.05	0
LG1	scaffold143-464196	68.05	0
LG1	scaffold143-512494	68.05	0
LG1	scaffold143-682038	68.05	0
LG1	scaffold9-458604	68.05	0
LG1	scaffold342-338998	68.05	0.0325
LG1	scaffold418-321260	68.05	0.0078
LG1	scaffold9-1031509	68.05	0.0165
LG1	scaffold418-146929	68.05	0.0078
LG1	scaffold342-132512	68.05	0.0079
LG1	scaffold298-943126	69.62	0.016
LG1	scaffold74-1580594	69.62	0.0233
LG1	scaffold284-555648	69.62	0
LG1	scaffold284-303670	69.62	0.008
LG1	scaffold143-932544	69.62	0.0233
LG1	scaffold284-555806	70.4	0.0236
LG1	scaffold284-257302	70.4	0.0078
LG1	scaffold418-122755	70.4	0.0161
LG1	scaffold256-221372	70.4	0.0339
LG1	scaffold143-270563	70.4	0.0078
LG1	scaffold74-1668724	70.4	0
LG1	scaffold284-696276	70.4	0.0238
LG1	scaffold284-51090	71.18	0.0317
LG1	scaffold143-843865	71.18	0
LG1	scaffold522-55394	71.18	0.0079
LG1	scaffold215-133324	71.97	0.0159
LG1	scaffold342-260450	72.76	0.0236
LG1	scaffold388-370389	72.76	0.0156
LG1	scaffold375-435762	72.76	0.0079
LG1	scaffold388-214746	73.55	0.033
LG1	scaffold522-112470	74.34	0.0155
LG1	scaffold256-273729	74.34	0.0079
LG1	scaffold215-122867	75.14	0.0505
LG1	scaffold143-443019	75.14	0.0655
LG1	scaffold522-318202	75.14	0.0157
LG1	scaffold388-83384	75.91	0
LG1	scaffold375-469435	75.91	0
LG1	scaffold256-141917	75.91	0.0079
LG1	scaffold143-380086	77.49	0
LG1	scaffold32-939008	78.27	0.033
LG1	scaffold418-284227	79.07	0.0081
LG1	scaffold342-545228	79.86	0
LG1	scaffold666-130796	79.86	0.0236
LG1	scaffold298-1243975	80.64	0.0078
LG1	scaffold121-15975	80.64	0.031
LG1	scaffold175-762190	81.43	0.0159
LG1	scaffold284-208037	82.21	0.016
LG1	scaffold175-584814	82.21	0
LG1	scaffold9-1161796	83	0.0248
LG1	scaffold256-621943	83	0.0323
LG1	scaffold9-228812	83	0.0165
LG1	scaffold215-243351	83	0
LG1	scaffold692-150904	83	0
LG1	scaffold522-167667	83	0
LG1	scaffold175-816596	83	0.0325
LG1	scaffold375-454143	83.78	0.048
LG1	scaffold143-512626	83.78	0.0078
LG1	scaffold9-272106	83.78	0
LG1	scaffold522-167979	86.16	0.0159
LG1	scaffold184-94654	86.16	0.0244
LG1	scaffold143-575362	87.74	0
LG1	scaffold298-1076826	88.52	0.0164
LG1	scaffold298-942982	88.52	0.0244
LG1	scaffold143-563224	88.52	0.025
LG1	scaffold143-803625	89.3	0.0237
LG1	scaffold284-181993	90.91	0.0242
LG1	scaffold342-600034	90.91	0.0248
LG1	scaffold284-65385	90.91	0.0312
LG1	scaffold9-456932	90.91	0
LG1	scaffold239-404933	91.71	0.0159
LG1	scaffold129-167074	93.47	0.0365
LG1	scaffold129-77250	94.57	0.0288
LG1	scaffold239-797005	95.68	0.0498
LG1	scaffold239-794356	96.45	0.017
LG1	scaffold121-569249	96.45	0.0498
LG1	scaffold284-46606	100.45	0.05
LG1	scaffold669-172220	100.45	0
LG1	scaffold239-425306	100.45	0.0237
LG1	scaffold239-147662	101.26	0.0083
LG1	scaffold669-114856	101.26	0.0411
LG1	scaffold121-317030	102	0.0238
LG1	scaffold239-257186	102	0.0156
LG1	scaffold669-114678	102	0
LG1	scaffold180-542025	102	0.0417
LG1	scaffold322-65367	102	0.0234
LG1	scaffold322-299863	102.78	0.0078
LG1	scaffold466-294082	102.78	0.0236
LG1	scaffold129-494417	102.78	0.0155
LG1	scaffold522-142138	102.78	0.0484
LG1	scaffold121-151647	103.57	0
LG1	scaffold121-257918	103.57	0.0315
LG1	scaffold89-1641010	104.35	0.0083
LG1	scaffold121-778475	105.14	0.0492
LG1	scaffold89-1377250	105.14	0.0238
LG1	scaffold89-1640808	105.14	0.0079
LG1	scaffold89-1463824	105.14	0
LG1	scaffold180-479173	105.14	0.0157
LG1	scaffold89-1231588	106.7	0.0159
LG1	scaffold180-324267	106.7	0.0155
LG1	scaffold89-1442904	106.7	0.0082
LG1	scaffold180-270282	106.7	0.0082
LG1	scaffold121-946323	106.7	0.0314
LG1	scaffold89-1504182	106.7	0.008
LG1	scaffold180-573816	107.47	0.0417
LG1	scaffold180-886742	107.47	0.0079
LG1	scaffold180-53874	107.47	0.0078
LG1	scaffold180-270208	107.47	0.0078
LG1	scaffold89-1706817	108.25	0.0078
LG1	scaffold121-1111500	108.25	0.0391
LG1	scaffold89-1193792	108.25	0.065
LG1	scaffold89-1123907	108.25	0.0155
LG1	scaffold89-1123936	108.25	0.0233
LG1	scaffold89-1193252	108.25	0.0413
LG1	scaffold89-1573319	108.25	0.0157
LG1	scaffold89-1296021	109.83	0.0079
LG1	scaffold89-1471344	109.83	0
LG1	scaffold180-165263	109.83	0
LG1	scaffold180-347443	109.83	0
LG1	scaffold89-1185096	109.83	0.0476
LG1	scaffold180-506352	111.4	0
LG1	scaffold180-550559	111.4	0.039
LG1	scaffold180-455314	112.19	0.0465
LG1	scaffold166-257707	112.19	0.0242
LG1	scaffold89-1419552	112.19	0.0081
LG1	scaffold180-247070	112.19	0.0157
LG1	scaffold89-1442711	112.95	0.0408
LG1	scaffold166-279848	112.95	0.0163
LG1	scaffold121-122940	114.53	0.0647
LG1	scaffold121-874464	114.53	0.0077
LG1	scaffold121-485248	115.32	0.0159
LG1	scaffold466-146564	116.93	0.0492
LG1	scaffold9-237805	116.93	0.0246
LG1	scaffold129-921499	116.93	0
LG1	scaffold239-506785	116.93	0.0156
LG1	scaffold322-270135	117.2	0.032
LG1	scaffold129-529209	117.69	0.0241
LG1	scaffold239-364776	118.48	0
LG1	scaffold129-726635	118.48	0.0081
LG1	scaffold375-490630	119.27	0
LG1	scaffold692-250150	119.27	0
LG1	scaffold32-768781	119.27	0.0082
LG1	scaffold284-711289	120.02	0
LG1	scaffold9-560721	120.02	0.0082
LG1	scaffold522-242257	120.02	0.0161
LG1	scaffold143-251141	120.02	0
LG1	scaffold284-263428	120.02	0.0079
LG1	scaffold9-837620	120.02	0.0547
LG1	scaffold256-741800	120.66	0.0425
LG1	scaffold388-440979	120.66	0.0254
LG1	scaffold165-1051409	120.66	0.017
LG1	scaffold9-1155859	122.09	0.0397
LG1	scaffold175-721767	122.09	0
LG1	scaffold143-874982	122.09	0.04
LG1	scaffold522-244340	122.09	0.0157
LG1	scaffold284-65923	122.09	0.056
LG1	scaffold143-1023670	122.09	0.031
LG1	scaffold284-595089	122.09	0.0078
LG1	scaffold32-948740	122.09	0.0078
LG1	scaffold32-816019	122.09	0.0234
LG1	scaffold9-1002878	122.09	0.0312
LG1	scaffold143-568744	122.09	0.0234
LG1	scaffold32-720790	122.09	0
LG1	scaffold342-358687	122.88	0.0155
LG1	scaffold342-333078	122.88	0.0157
LG1	scaffold284-626555	122.88	0
LG1	scaffold143-374559	123.2	0.0236
LG1	scaffold215-102566	123.66	0.0159
LG1	scaffold1034-37264	123.66	0.0078
LG1	scaffold375-422667	123.66	0.0234
LG1	scaffold9-1084282	123.66	0
LG1	scaffold669-67724	124.44	0
LG1	scaffold239-715822	124.44	0.0157
LG1	scaffold322-265596	124.44	0.0163
LG1	scaffold175-727142	126.82	0
LG1	scaffold284-479334	126.82	0.0397
LG1	scaffold418-229813	126.82	0
LG1	scaffold284-711324	126.82	0.0079
LG1	scaffold115-1023817	127.6	0.0161
LG1	scaffold143-164533	127.6	0.024
LG1	scaffold1343-975	127.6	0.016
LG1	scaffold298-942914	129.18	0
LG1	scaffold256-421248	129.18	0.0242
LG1	scaffold129-921735	131.55	0.0246
LG1	scaffold669-57125	131.55	0.0082
LG1	scaffold1454-2623	132.31	0.0397
LG1	scaffold284-619249	133.91	0
LG1	scaffold388-186609	133.91	0.0248
LG1	scaffold342-332831	133.91	0.0244
LG1	scaffold32-576535	134.71	0.0083
LG1	scaffold298-726788	135.5	0.008
LG1	scaffold215-109594	136.29	0
LG1	scaffold9-522013	136.29	0.0155
LG1	scaffold143-382938	136.29	0.0083
LG1	scaffold522-197910	137.08	0.0233
LG1	scaffold143-394682	137.09	0.0407
LG1	scaffold298-1250829	138.66	0
LG1	scaffold115-1158586	139.44	0.0079
LG1	scaffold143-976012	139.44	0.0248
LG1	scaffold322-346544	139.44	0.0156
LG1	scaffold375-304093	139.44	0.041
LG1	scaffold9-968399	139.44	0.0403
LG1	scaffold143-728240	139.44	0.0233
LG1	scaffold143-563295	139.44	0.0233
LG1	scaffold375-301107	139.44	0.0317
LG1	scaffold9-967400	140.22	0.048
LG1	scaffold284-205014	140.22	0
LG1	scaffold388-105208	141	0.0476
LG1	scaffold388-469363	141	0.0079
LG1	scaffold256-706476	141	0.0244
LG1	scaffold9-842246	141	0.0313
LG1	scaffold284-640073	141	0
LG1	scaffold9-702969	141	0
LG1	scaffold669-144639	141	0.032
LG1	scaffold9-332476	141.78	0.0082
LG1	scaffold388-341410	141.78	0.0156
LG1	scaffold166-325868	143.51	0.0483
LG1	scaffold89-1034442	145.74	0.0178
LG1	scaffold180-315586	146.62	0.0307
LG1	scaffold180-171612	148.25	0.027
LG1	scaffold89-1868969	148.25	0.0441
LG1	scaffold180-826248	150.31	0.0255
LG1	scaffold166-43289	150.31	0.0575
LG1	scaffold239-796986	151.89	0.0598
LG1	scaffold89-1728013	151.89	0.0227
LG1	scaffold180-329962	152.74	0.0238
LG1	scaffold121-1092498	154.39	0.0325
LG1	scaffold5093-350	156.89	0.0166
LG1	scaffold89-1869200	157.67	0
LG1	scaffold268-37675	165.24	0.0471
LG1	scaffold268-50010	165.24	0.0254
LG1	scaffold268-260050	166.01	0.0246
LG1	scaffold268-250584	167.68	0.0161
LG1	scaffold268-209613	168.47	0.0155
LG1	scaffold125-66347	168.47	0.0323
LG1	scaffold166-157067	169.26	0.0158
LG1	scaffold268-338548	170.04	0.0253
LG1	scaffold166-20323	171.65	0.0328
LG1	scaffold125-724682	171.65	0.0318
LG1	scaffold89-1102450	172.43	0.048
LG1	scaffold268-315861	172.43	0.0159
LG1	scaffold89-1807528	172.43	0.0476
LG1	scaffold268-680158	173.63	0.0376
LG1	scaffold268-444274	174.39	0.0369
LG1	scaffold166-141557	175.6	0
LG1	scaffold268-533975	175.6	0.0081
LG1	scaffold268-619413	176.39	0.008
LG1	scaffold268-280967	177.18	0.0079
LG1	scaffold268-421370	177.18	0.0238
LG1	scaffold268-424430	177.18	0.0157
LG1	scaffold268-140590	177.96	0
LG1	scaffold268-88387	178.74	0
LG1	scaffold268-518337	180.32	0.0233
LG1	scaffold268-69133	180.32	0
LG1	scaffold268-513687	182.71	0.0233
LG1	scaffold268-61408	182.71	0.0569
LG1	scaffold125-440116	183.51	0.0583
LG1	scaffold125-178001	184.3	0.008
LG1	scaffold125-227022	185.09	0.0079
LG1	scaffold125-487593	185.09	0.0078
LG1	scaffold125-194753	185.09	0.0078
LG1	scaffold125-227062	185.09	0.0078
LG1	scaffold125-865685	185.09	0.0078
LG1	scaffold125-859536	185.09	0.0158
LG1	scaffold125-826489	185.09	0.0661
LG1	scaffold125-947087	185.9	0.0076
LG1	scaffold125-245051	185.9	0
LG1	scaffold125-547961	185.9	0.0413
LG1	scaffold135-200417	186.63	0.0749
LG1	scaffold125-376177	188.3	0.0081
LG1	scaffold125-376195	188.3	0
LG1	scaffold268-280810	188.3	0.0496
LG1	scaffold125-721884	189.09	0.0484
LG1	scaffold125-245096	189.09	0.0081
LG1	scaffold125-509131	189.09	0.0492
LG1	scaffold125-912047	189.92	0.0546
LG1	scaffold125-577152	189.92	0.0386
LG1	scaffold125-704281	190.77	0.04
LG1	scaffold125-428918	191.56	0.0243
LG1	scaffold125-532014	192.35	0.0394
LG1	scaffold125-259644	192.35	0
LG1	scaffold125-626370	192.35	0
LG1	scaffold125-114414	193.15	0.048
LG1	scaffold125-704120	193.15	0.0157
LG1	scaffold125-468127	193.94	0.0076
LG1	scaffold125-577089	193.94	0.0081
LG1	scaffold125-138182	193.94	0.032
LG1	scaffold125-412518	193.94	0.0078
LG1	scaffold135-161162	194.73	0
LG1	scaffold135-213835	194.73	0.032
LG1	scaffold135-147702	194.73	0.008
LG1	scaffold135-44477	195.52	0.0325
LG1	scaffold125-415559	196.32	0.0394
LG1	scaffold135-9681	196.32	0.0081
LG1	scaffold135-132401	197.1	0
LG1	scaffold125-353223	197.88	0.0656
LG1	scaffold135-160806	197.88	0.0165
LG1	scaffold135-35145	197.88	0.0157
LG1	scaffold135-200708	198.67	0
LG1	scaffold135-200873	198.67	0.056
LG1	scaffold135-8883	199.45	0.0163
LG1	scaffold516-361006	199.45	0.0394
LG1	scaffold135-166283	199.45	0
LG1	scaffold125-313394	200.24	0.0583
LG1	scaffold125-865799	201.03	0.0317
LG1	scaffold125-544167	201.03	0
LG1	scaffold166-56373	204.1	0.0508
LG1	scaffold166-120496	204.78	0.0672
LG1	scaffold166-19010	204.78	0.0186
LG1	scaffold180-173789	204.78	0.0747
LG1	scaffold166-218705	205.04	0.0325
LG1	scaffold268-338342	205.3	0
LG1	scaffold268-624016	205.3	0.0081
LG1	scaffold268-195940	206.08	0.0313
LG1	scaffold268-476109	206.08	0.0315
LG1	scaffold268-683864	207.65	0.032
LG1	scaffold268-541488	207.65	0.0233
LG1	scaffold268-136087	207.65	0.0079
LG1	scaffold268-199872	207.65	0.0159
LG1	scaffold268-303438	207.65	0
LG1	scaffold166-168193	207.65	0.0242
LG1	scaffold121-496681	209.29	0.0507
LG1	scaffold121-882035	210.04	0.039
LG1	scaffold89-1512146	210.04	0
LG1	scaffold180-506406	210.82	0
LG1	scaffold89-1042052	210.82	0
LG1	scaffold166-400923	212.84	0.0203
LG1	scaffold89-1805882	213.61	0.0122
LG1	scaffold89-1264151	214.83	0.0414
LG1	scaffold121-985079	215.61	0.0484
LG1	scaffold180-320313	215.61	0
LG1	scaffold121-881797	216.08	0.0432
LG1	scaffold516-151786	225.35	0.0345
LG1	scaffold516-238968	225.9	0.0551
LG1	scaffold966-29881	225.9	0.0488
LG1	scaffold516-194836	225.9	0.0588
LG1	scaffold516-235098	225.9	0.0569
LG1	scaffold639-94851	226.68	0.0322
LG1	scaffold639-126599	226.68	0.0387
LG1	scaffold639-109841	226.68	0.0156
LG1	scaffold516-347087	226.68	0.072
LG1	scaffold639-35249	226.68	0.0794
LG1	scaffold348-143474	229.13	0.0242
LG1	scaffold348-72780	229.89	0.0078
LG1	scaffold348-99933	229.89	0.0714
LG1	scaffold777-34109	229.89	0.0547
LG1	scaffold348-79072	229.89	0.0079
LG1	scaffold348-100543	229.89	0.0238
LG1	scaffold348-47555	230.67	0.0078
LG1	scaffold348-100443	230.67	0.0238
LG1	scaffold777-104499	230.67	0.0569
LG1	scaffold348-35398	231.47	0.0491
LG1	scaffold777-86703	236.01	0.0486
LG1	scaffold777-13780	238.74	0
LG2	scaffold218-131766	0	0
LG2	scaffold227-375973	6.1	0
LG2	scaffold58-1445880	6.91	0
LG2	scaffold218-610443	9.47	0.0077
LG2	scaffold889-59450	11.95	0
LG2	scaffold218-162140	11.95	0.0238
LG2	scaffold314-788400	12.73	0.008
LG2	scaffold528-218773	12.73	0
LG2	scaffold53-2051581	12.73	0.0157
LG2	scaffold528-84983	13.52	0.0238
LG2	scaffold889-93075	14.31	0.0508
LG2	scaffold218-160424	14.31	0.0082
LG2	scaffold206-94885	14.31	0.0593
LG2	scaffold436-101715	14.31	0
LG2	scaffold314-683621	15.13	0.0552
LG2	scaffold218-526987	15.13	0.0797
LG2	scaffold684-133339	15.95	0.0317
LG2	scaffold206-384489	15.95	0.0248
LG2	scaffold58-1407621	15.95	0.065
LG2	scaffold158-763039	15.95	0.063
LG2	scaffold58-1284384	15.95	0.0312
LG2	scaffold218-300044	15.95	0.0079
LG2	scaffold218-273172	16.69	0.0583
LG2	scaffold656-374214	16.69	0.0242
LG2	scaffold528-227848	16.69	0.0407
LG2	scaffold218-299669	17.49	0.05
LG2	scaffold227-246133	18.26	0.0655
LG2	scaffold218-190859	19.05	0.0155
LG2	scaffold218-365576	19.05	0.0323
LG2	scaffold436-103409	19.84	0.0499
LG2	scaffold218-827366	20.65	0.0491
LG2	scaffold218-661754	20.65	0.0743
LG2	scaffold227-250572	20.65	0.0331
LG2	scaffold218-691954	20.65	0.063
LG2	scaffold436-290642	21.44	0.0325
LG2	scaffold227-375727	21.44	0.0564
LG2	scaffold58-1407634	21.44	0.0238
LG2	scaffold656-334814	22.93	0.0336
LG2	scaffold656-324174	22.93	0.0422
LG2	scaffold227-250582	22.93	0.0173
LG2	scaffold314-818256	24.46	0.0251
LG2	scaffold206-213094	25.24	0.0247
LG2	scaffold428-161293	26.03	0.0547
LG2	scaffold206-783127	26.03	0.0159
LG2	scaffold314-996240	26.03	0.0248
LG2	scaffold684-244790	26.03	0.0248
LG2	scaffold53-2114688	26.03	0
LG2	scaffold158-320700	26.03	0.008
LG2	scaffold436-281386	26.03	0.0661
LG2	scaffold201-89990	27.3	0.0449
LG2	scaffold314-992354	27.3	0.028
LG2	scaffold218-292611	27.3	0.028
LG2	scaffold227-339038	27.79	0.0573
LG2	scaffold428-319067	27.79	0.0403
LG2	scaffold218-143492	27.79	0.0473
LG2	scaffold58-1445897	27.79	0.0826
LG2	scaffold747-108577	28.58	0.016
LG2	scaffold684-9922	28.58	0.0244
LG2	scaffold218-414381	29.36	0.0156
LG2	scaffold53-2140570	29.36	0.0488
LG2	scaffold656-240982	29.36	0.0476
LG2	scaffold314-543450	29.36	0.0738
LG2	scaffold314-793251	29.36	0.0159
LG2	scaffold218-735957	30.15	0.0508
LG2	scaffold528-264727	30.94	0.0244
LG2	scaffold58-1118672	30.94	0.075
LG2	scaffold158-854902	30.94	0.016
LG2	scaffold737-231367	30.94	0.0952
LG2	scaffold436-31582	31.72	0.033
LG2	scaffold206-213091	32.51	0.0394
LG2	scaffold158-569294	32.51	0.024
LG2	scaffold206-794593	32.51	0
LG2	scaffold889-93023	32.51	0.075
LG2	scaffold58-1188046	33.29	0.0403
LG2	scaffold436-239285	33.29	0.016
LG2	scaffold206-388690	34.08	0.0236
LG2	scaffold737-271844	34.08	0.0635
LG2	scaffold428-118219	34.08	0.0155
LG2	scaffold58-1120716	34.08	0.0078
LG2	scaffold314-830246	34.08	0.0155
LG2	scaffold314-818261	34.08	0.0579
LG2	scaffold218-237745	34.08	0.0744
LG2	scaffold314-836167	34.86	0.0569
LG2	scaffold158-706051	34.86	0.0393
LG2	scaffold436-208691	34.86	0.032
LG2	scaffold201-11827	35.64	0.0403
LG2	scaffold218-299569	35.64	0.031
LG2	scaffold227-251255	35.64	0.0397
LG2	scaffold206-704170	35.64	0.0738
LG2	scaffold314-519721	35.64	0.024
LG2	scaffold218-247301	37.22	0.0407
LG2	scaffold218-610626	37.22	0.0484
LG2	scaffold528-69010	37.22	0.0164
LG2	scaffold737-262593	37.22	0.0656
LG2	scaffold747-110071	37.22	0
LG2	scaffold218-160689	38	0
LG2	scaffold218-668804	38	0.0333
LG2	scaffold58-1192701	38	0.0583
LG2	scaffold218-618151	38	0.0732
LG2	scaffold436-83737	38	0.0244
LG2	scaffold314-992653	38	0.016
LG2	scaffold227-72198	38	0.065
LG2	scaffold428-200225	38	0.0726
LG2	scaffold227-260593	38.78	0
LG2	scaffold158-251684	38.78	0
LG2	scaffold436-168094	39.56	0
LG2	scaffold656-367528	41.04	0.0498
LG2	scaffold158-821887	41.04	0.032
LG2	scaffold528-207053	41.04	0.082
LG2	scaffold158-291588	41.84	0.0505
LG2	scaffold58-1120669	41.84	0.0407
LG2	scaffold436-103227	45.14	0.0159
LG2	scaffold528-218508	45.14	0
LG2	scaffold314-980448	49.2	0.0551
LG2	scaffold436-31588	49.2	0.0747
LG2	scaffold206-213049	50.3	0.0722
LG2	scaffold227-339315	50.97	0.0231
LG2	scaffold218-414854	58.2	0.0087
LG2	scaffold158-201797	58.98	0
LG2	scaffold656-367151	63.22	0.0516
LG2	scaffold656-367565	63.86	0.0398
LG2	scaffold58-1463828	63.86	0.0244
LG2	scaffold58-1448692	63.86	0.0506
LG2	scaffold158-302390	65.35	0.0603
LG2	scaffold314-846956	68.95	0.041
LG2	scaffold158-762877	69.63	0.0478
LG2	scaffold158-223681	70.57	0.0157
LG2	scaffold684-70017	70.57	0.0157
LG2	scaffold218-283585	70.57	0.0976
LG2	scaffold428-74779	70.57	0.0732
LG2	scaffold206-479847	71.35	0.0078
LG2	scaffold158-223689	71.35	0.0078
LG2	scaffold656-240895	71.35	0.0233
LG2	scaffold528-169981	71.35	0.0078
LG2	scaffold428-415995	71.35	0.0574
LG2	scaffold314-711481	71.35	0.0079
LG2	scaffold428-282606	71.35	0
LG2	scaffold201-160836	71.35	0.056
LG2	scaffold436-293087	71.35	0.0476
LG2	scaffold201-12030	71.35	0.0078
LG2	scaffold314-604790	71.35	0.0543
LG2	scaffold528-225050	71.35	0.0484
LG2	scaffold158-463489	71.35	0.0315
LG2	scaffold158-895747	72.14	0.0078
LG2	scaffold436-101333	72.92	0.0234
LG2	scaffold436-283712	72.92	0
LG2	scaffold656-308273	73.7	0.0165
LG2	scaffold206-330769	73.7	0.0233
LG2	scaffold314-711284	73.7	0.008
LG2	scaffold436-95199	73.7	0.08
LG2	scaffold314-917154	73.7	0
LG2	scaffold747-84919	73.7	0.0155
LG2	scaffold201-160667	73.7	0.0806
LG2	scaffold206-14882	73.7	0.0244
LG2	scaffold436-149718	73.7	0.0397
LG2	scaffold528-195266	73.7	0.0157
LG2	scaffold146-1619162	73.7	0.0866
LG2	scaffold314-933623	73.7	0.0079
LG2	scaffold428-32455	74.5	0.08
LG2	scaffold747-110248	74.5	0.0651
LG2	scaffold436-290665	75.3	0.0501
LG2	scaffold436-167530	75.3	0.0565
LG2	scaffold528-207284	76.06	0.0401
LG2	scaffold436-273323	77.73	0.0592
LG2	scaffold314-645788	79.4	0.0327
LG2	scaffold206-743573	80.2	0.0172
LG2	scaffold314-960720	80.2	0.0654
LG2	scaffold170-54191	84.6	0.0277
LG2	scaffold58-1107068	85.99	0
LG2	scaffold314-957673	88.45	0.0436
LG2	scaffold60-125942	90.88	0.0081
LG2	scaffold158-380836	90.88	0.0161
LG2	scaffold684-251291	93.34	0.0698
LG2	scaffold58-1526191	95.77	0.0079
LG2	scaffold314-960768	95.77	0.0156
LG2	scaffold60-125936	95.77	0
LG2	scaffold314-1068329	95.77	0.0738
LG2	scaffold58-1445666	95.77	0.0244
LG2	scaffold227-351103	95.77	0.0397
LG2	scaffold528-186624	96.55	0.0161
LG2	scaffold436-283826	96.55	0.0318
LG2	scaffold218-624162	97.33	0.016
LG2	scaffold158-395510	97.33	0.0078
LG2	scaffold158-828669	97.33	0.0556
LG2	scaffold528-118847	99.18	0.0211
LG2	scaffold206-722074	99.18	0.0117
LG2	scaffold146-1549682	100.78	0.0778
LG2	scaffold314-614538	100.78	0.0452
LG2	scaffold684-218167	100.78	0.0448
LG2	scaffold218-691875	101.8	0.024
LG2	scaffold428-434317	101.8	0.0163
LG2	scaffold428-288806	101.8	0
LG2	scaffold227-369789	101.8	0
LG2	scaffold218-700694	101.8	0
LG2	scaffold218-448216	101.8	0.0403
LG2	scaffold53-2124676	101.8	0.0574
LG2	scaffold737-250829	101.8	0.04
LG2	scaffold58-1270193	101.8	0.048
LG2	scaffold158-473825	102.59	0.0574
LG2	scaffold158-506537	102.59	0.072
LG2	scaffold436-101280	102.59	0.048
LG2	scaffold436-290706	102.59	0.0315
LG2	scaffold227-375634	102.59	0.048
LG2	scaffold314-788419	104.14	0.0084
LG2	scaffold314-677018	104.14	0.0486
LG2	scaffold314-950568	104.93	0.0085
LG2	scaffold656-308584	105.69	0.0484
LG2	scaffold158-179279	105.69	0.0244
LG2	scaffold656-401342	105.69	0.0325
LG2	scaffold684-218176	105.69	0.016
LG2	scaffold684-254989	107.39	0.0326
LG2	scaffold218-727246	107.39	0.0567
LG2	scaffold656-317667	109.06	0.0252
LG2	scaffold436-224898	110.03	0.0893
LG2	scaffold656-224291	112.57	0.018
LG2	scaffold158-810787	114.07	0.0327
LG2	scaffold218-257187	114.84	0
LG2	scaffold218-454497	114.84	0.0661
LG2	scaffold206-760054	115.63	0
LG2	scaffold158-513424	115.63	0
LG2	scaffold656-224505	115.63	0.0155
LG2	scaffold656-308463	115.63	0.0238
LG2	scaffold218-261037	115.63	0
LG2	scaffold158-389409	116.36	0.0644
LG2	scaffold218-238005	118.01	0.0315
LG2	scaffold218-460901	118.01	0.0238
LG2	scaffold158-727670	118.01	0.0165
LG2	scaffold206-780900	118.01	0.0667
LG2	scaffold218-281967	118.01	0.0391
LG2	scaffold218-257713	118.79	0.0322
LG2	scaffold528-200841	119.58	0.0157
LG2	scaffold218-80333	119.58	0.0157
LG2	scaffold227-260266	119.58	0.0081
LG2	scaffold158-419546	119.58	0.016
LG2	scaffold206-814287	119.58	0.0645
LG2	scaffold314-711777	119.58	0.062
LG2	scaffold227-307608	119.58	0.0159
LG2	scaffold737-257106	120.36	0.0078
LG2	scaffold656-491446	120.36	0
LG2	scaffold158-456848	120.36	0.0465
LG2	scaffold201-89924	120.36	0
LG2	scaffold58-1215031	120.36	0.0312
LG2	scaffold436-31431	120.36	0
LG2	scaffold218-637954	120.36	0.0317
LG2	scaffold201-114128	120.36	0.008
LG2	scaffold218-257484	120.36	0.0238
LG2	scaffold58-1448845	120.36	0.0078
LG2	scaffold158-756892	120.36	0.0233
LG2	scaffold428-197091	120.36	0.0078
LG2	scaffold158-283422	120.36	0.0484
LG2	scaffold206-367728	120.36	0.0079
LG2	scaffold218-454092	120.36	0.0551
LG2	scaffold218-593006	121.15	0.0079
LG2	scaffold60-144687	121.15	0.0156
LG2	scaffold227-3794	121.93	0
LG2	scaffold656-447283	121.93	0.0078
LG2	scaffold428-197014	121.93	0.0484
LG2	scaffold158-959572	121.93	0.0083
LG2	scaffold428-288758	121.93	0.0625
LG2	scaffold528-192298	122.71	0.0403
LG2	scaffold528-200992	122.71	0.0312
LG2	scaffold314-833092	122.71	0.0328
LG2	scaffold314-771599	122.71	0.0709
LG2	scaffold436-280976	122.71	0
LG2	scaffold218-515200	122.71	0.0472
LG2	scaffold372-439247	122.71	0
LG2	scaffold58-1118740	122.71	0
LG2	scaffold889-99289	122.71	0.063
LG2	scaffold218-454075	122.71	0.0551
LG2	scaffold528-212968	123.49	0.0079
LG2	scaffold60-125732	123.49	0
LG2	scaffold428-237742	123.49	0.0394
LG2	scaffold158-419223	124.28	0
LG2	scaffold889-99292	124.28	0.0472
LG2	scaffold528-38446	124.28	0.0078
LG2	scaffold528-195232	125.06	0.0163
LG2	scaffold314-783483	125.06	0.0156
LG2	scaffold428-298699	125.06	0.0488
LG2	scaffold53-2019926	125.06	0
LG2	scaffold428-258109	125.06	0
LG2	scaffold436-366128	126.65	0
LG2	scaffold436-397043	126.65	0.0314
LG2	scaffold314-846927	128.24	0.0775
LG2	scaffold206-234965	129.87	0.051
LG2	scaffold58-1370748	132.34	0.0079
LG2	scaffold372-274480	132.34	0
LG2	scaffold218-593004	134.84	0.0657
LG2	scaffold747-160047	136.45	0.0386
LG2	scaffold206-213359	136.45	0.0663
LG2	scaffold656-308244	137.2	0.0334
LG2	scaffold436-103447	140.58	0.0258
LG2	scaffold58-1440147	141.16	0.0435
LG2	scaffold201-11814	142.11	0.0334
LG2	scaffold428-62700	143.69	0.0256
LG2	scaffold227-339063	146.16	0.0157
LG2	scaffold656-308322	146.16	0.0484
LG2	scaffold201-19382	146.94	0.0826
LG2	scaffold436-95137	146.94	0
LG2	scaffold436-154875	147.73	0.0079
LG2	scaffold737-239613	149.33	0.0589
LG2	scaffold227-250837	149.33	0.0404
LG2	scaffold656-408257	150.12	0.0473
LG2	scaffold206-157098	150.12	0.0404
LG2	scaffold314-1006239	150.99	0
LG2	scaffold158-608390	159.63	0
LG2	scaffold436-243302	160.44	0
LG2	scaffold218-160571	163.05	0.0214
LG2	scaffold201-160616	167.18	0.0366
LG2	scaffold158-975046	172.8	0
LG2	scaffold737-257365	173.62	0
LG3	scaffold551-269112	0	0
LG3	scaffold16-731489	1.11	0.0534
LG3	scaffold16-856478	1.85	0.0254
LG3	scaffold16-860857	4.28	0
LG3	scaffold351-113198	4.28	0.0413
LG3	scaffold351-121544	4.28	0.0569
LG3	scaffold76-1346601	5.07	0.0158
LG3	scaffold482-191386	5.86	0.0551
LG3	scaffold551-278256	5.86	0.0081
LG3	scaffold16-1265954	6.64	0.0574
LG3	scaffold482-294230	6.64	0.0543
LG3	scaffold482-347266	6.64	0.016
LG3	scaffold293-231828	6.64	0.0569
LG3	scaffold551-159136	6.64	0.0233
LG3	scaffold269-146762	6.64	0
LG3	scaffold482-392920	6.64	0.0078
LG3	scaffold75-1065472	7.43	0.0756
LG3	scaffold16-888637	8.21	0.0236
LG3	scaffold16-1232364	8.21	0.0164
LG3	scaffold750-130446	8.21	0.0488
LG3	scaffold269-648108	8.21	0.1484
LG3	scaffold155-52909	8.21	0.0492
LG3	scaffold155-21708	9.79	0.0078
LG3	scaffold293-668362	9.79	0.0328
LG3	scaffold293-484504	9.79	0.0397
LG3	scaffold75-1019693	9.79	0
LG3	scaffold351-389913	10.57	0.0078
LG3	scaffold848-93776	11.38	0
LG3	scaffold351-249421	12.17	0.0077
LG3	scaffold293-355953	14.13	0.0203
LG3	scaffold269-323355	14.13	0.0627
LG3	scaffold75-1043611	19.47	0.0081
LG3	scaffold351-284878	19.47	0
LG3	scaffold245-1116027	41.22	0
LG3	scaffold304-1091848	41.22	0.0082
LG3	scaffold518-389150	47.54	0.0266
LG3	scaffold42-64825	52.87	0
LG3	scaffold417-206477	53.68	0
LG3	scaffold518-116664	59.32	0.0236
LG3	scaffold351-3682	59.63	0.0272
LG3	scaffold351-121827	61.79	0.0565
LG3	scaffold148-845316	61.79	0.0322
LG3	scaffold251-507009	62.59	0
LG3	scaffold269-456477	62.59	0.0738
LG3	scaffold276-535799	63.37	0.0489
LG3	scaffold361-118246	63.37	0.0489
LG3	scaffold214-201971	67.13	0.0372
LG3	scaffold214-431059	68.7	0.0124
LG3	scaffold95-1972343	69.9	0.0163
LG3	scaffold104-82849	71.54	0.0581
LG3	scaffold269-513740	71.54	0.0572
LG3	scaffold16-1333107	72.36	0.0479
LG3	scaffold91-1140697	73.15	0.0081
LG3	scaffold16-189172	73.96	0.0079
LG3	scaffold16-1333138	74.19	0.0285
LG3	scaffold16-1080654	74.19	0.0473
LG3	scaffold91-2033767	74.19	0.0713
LG3	scaffold91-846566	76.06	0.0247
LG3	scaffold148-748665	77.07	0.0302
LG3	scaffold95-1570867	77.07	0.0136
LG3	scaffold518-306657	78.67	0.0498
LG3	scaffold191-68512	78.67	0.0262
LG3	scaffold95-1834093	79.43	0.0584
LG3	scaffold191-98374	80.84	0
LG3	scaffold95-1924379	82.41	0.0787
LG3	scaffold269-539661	82.41	0.0397
LG3	scaffold276-771305	82.41	0.0488
LG3	scaffold251-257125	82.41	0.0238
LG3	scaffold269-330400	82.41	0.0703
LG3	scaffold42-74386	83.2	0.016
LG3	scaffold228-1243402	83.2	0.0793
LG3	scaffold269-17327	83.2	0.0476
LG3	scaffold276-454688	83.98	0.0078
LG3	scaffold228-1477566	83.98	0.048
LG3	scaffold148-318512	83.98	0.016
LG3	scaffold228-1331142	83.98	0.048
LG3	scaffold518-363981	84.76	0.0078
LG3	scaffold191-81948	84.76	0.0565
LG3	scaffold314-187804	84.76	0.0645
LG3	scaffold870-114809	84.76	0.065
LG3	scaffold228-1391340	84.76	0.0078
LG3	scaffold510-399035	84.76	0.0234
LG3	scaffold245-1012088	84.76	0.088
LG3	scaffold251-308024	84.76	0.0242
LG3	scaffold191-129979	84.76	0
LG3	scaffold75-1125664	84.76	0.0157
LG3	scaffold351-478484	84.76	0.0078
LG3	scaffold76-1294960	84.76	0.024
LG3	scaffold276-901561	84.76	0.0078
LG3	scaffold510-275041	84.76	0.0078
LG3	scaffold417-169277	84.76	0.0656
LG3	scaffold228-1363334	84.76	0.0155
LG3	scaffold870-81260	84.76	0.024
LG3	scaffold417-148485	85.55	0.0826
LG3	scaffold518-106536	86.34	0.024
LG3	scaffold95-1941044	86.34	0.0246
LG3	scaffold276-674069	86.34	0.056
LG3	scaffold870-81270	87.14	0.0397
LG3	scaffold95-1613570	87.14	0.0156
LG3	scaffold314-206582	88.18	0
LG3	scaffold148-436608	88.18	0.05
LG3	scaffold178-1040651	90.38	0.0325
LG3	scaffold178-1002097	91.13	0
LG3	scaffold228-1207572	94.23	0.0306
LG3	scaffold518-46729	97.08	0.0255
LG3	scaffold595-278320	97.08	0.0675
LG3	scaffold214-481094	97.69	0
LG3	scaffold228-1507385	98.48	0.0158
LG3	scaffold228-1248693	99.27	0
LG3	scaffold269-499948	100.05	0.0394
LG3	scaffold276-771248	100.05	0.0472
LG3	scaffold214-435292	100.05	0
LG3	scaffold276-304300	100.82	0.0252
LG3	scaffold214-99625	100.82	0.0489
LG3	scaffold482-327723	101.59	0.0328
LG3	scaffold482-199740	101.59	0.0416
LG3	scaffold482-176402	103.16	0.0079
LG3	scaffold245-900939	103.16	0.0489
LG3	scaffold251-311279	103.97	0.0333
LG3	scaffold191-52397	103.97	0.0234
LG3	scaffold551-258866	104.74	0.0169
LG3	scaffold245-975537	108.04	0
LG3	scaffold269-499830	108.8	0.0335
LG3	scaffold417-147740	111.29	0.0248
LG3	scaffold76-1259394	111.29	0.0487
LG3	scaffold228-1165914	112.97	0.0658
LG3	scaffold50-628549	114.08	0.0246
LG3	scaffold228-1324596	117.25	0.0328
LG3	scaffold191-43154	118.06	0
LG3	scaffold750-132743	129.4	0.0171
LG3	scaffold16-303852	136.47	0.0461
LG3	scaffold269-323308	139.37	0.0164
LG3	scaffold269-78180	139.37	0.0333
LG3	scaffold482-349353	139.37	0.0248
LG3	scaffold351-275829	140.95	0.0163
LG3	scaffold75-1046940	140.95	0.0314
LG3	scaffold16-510965	143.38	0.0744
LG3	scaffold293-149351	143.38	0.008
LG3	scaffold16-192587	143.38	0
LG3	scaffold293-231711	143.38	0.0233
LG3	scaffold16-958546	143.38	0.0078
LG3	scaffold155-21744	143.38	0.008
LG3	scaffold16-539660	143.38	0.0397
LG3	scaffold16-1000833	143.38	0.0244
LG3	scaffold16-658416	143.38	0.0155
LG3	scaffold178-1082043	143.38	0.0394
LG3	scaffold16-236058	143.38	0.0079
LG3	scaffold16-826723	144.16	0.0161
LG3	scaffold351-387404	144.16	0.0397
LG3	scaffold16-658419	144.16	0.0234
LG3	scaffold293-201857	144.95	0.0323
LG3	scaffold16-1138670	144.95	0.0081
LG3	scaffold16-837637	145.74	0.0569
LG3	scaffold16-958539	145.74	0.0244
LG3	scaffold16-177833	148.35	0.0329
LG3	scaffold848-105063	148.99	0.0263
LG3	scaffold848-78177	149.64	0.0519
LG3	scaffold16-1035756	149.64	0.0533
LG3	scaffold304-964258	155.07	0.0307
LG3	scaffold104-206996	155.89	0.0284
LG3	scaffold91-1075407	155.89	0.051
LG3	scaffold395-171466	161.86	0
LG3	scaffold395-267887	162.62	0.016
LG3	scaffold16-725150	165.89	0
LG3	scaffold42-274054	166.29	0.008
LG3	scaffold551-269203	166.67	0
LG3	scaffold29-239888	166.67	0.0234
LG3	scaffold228-1275896	167.49	0.0161
LG3	scaffold29-235286	167.49	0.0331
LG3	scaffold214-560907	168.25	0.0078
LG3	scaffold228-1504234	169.05	0
LG3	scaffold397-498673	169.05	0
LG3	scaffold293-316329	169.83	0.0157
LG3	scaffold91-2095113	170.62	0.0078
LG3	scaffold16-669127	170.62	0
LG3	scaffold16-881416	170.62	0
LG3	scaffold870-45793	172.24	0.0557
LG3	scaffold817-71552	172.98	0.0323
LG3	scaffold817-3041	172.98	0.0079
LG3	scaffold16-265152	172.98	0.048
LG3	scaffold16-359142	172.98	0.0163
LG3	scaffold16-892599	173.78	0.0645
LG3	scaffold214-821810	173.78	0
LG3	scaffold16-622028	174.56	0.0312
LG3	scaffold293-311981	174.56	0.064
LG3	scaffold269-45560	174.56	0.032
LG3	scaffold395-264717	174.56	0
LG3	scaffold395-35764	175.37	0.0503
LG3	scaffold482-349322	176.16	0.0719
LG3	scaffold155-273744	176.16	0.0395
LG3	scaffold155-174518	176.16	0.0625
LG3	scaffold551-154406	177.04	0.0417
LG3	scaffold16-709999	177.04	0.0407
LG3	scaffold16-888953	178.13	0.0304
LG3	scaffold395-426011	178.13	0.0391
LG3	scaffold518-267741	179.12	0.0258
LG3	scaffold395-249195	182.92	0.025
LG3	scaffold16-1475013	183.82	0.008
LG3	scaffold293-149166	183.82	0.0078
LG3	scaffold16-574984	185.39	0.0574
LG3	scaffold16-1069065	185.39	0
LG3	scaffold75-971238	186.18	0.0629
LG3	scaffold293-323213	186.97	0
LG3	scaffold304-964261	186.97	0.0236
LG3	scaffold293-561073	186.97	0.0078
LG3	scaffold16-501185	189.35	0
LG3	scaffold712-87370	190.1	0.0413
LG3	scaffold16-860695	192.21	0.0116
LG3	scaffold16-261201	192.21	0.0285
LG3	scaffold351-525647	194.26	0.0412
LG3	scaffold351-497355	194.26	0.0405
LG3	scaffold1062-2485	202.76	0
LG3	scaffold1062-2514	202.76	0.008
LG3	scaffold16-1380342	209.83	0.0522
LG3	scaffold16-1495824	211.25	0.0081
LG3	scaffold155-91586	212.04	0.0158
LG3	scaffold16-265082	212.04	0
LG3	scaffold16-658139	212.04	0.0236
LG3	scaffold293-40257	212.82	0.008
LG3	scaffold16-1341440	212.82	0.0158
LG3	scaffold16-820845	213.6	0.008
LG3	scaffold16-265153	213.6	0.0159
LG3	scaffold16-134122	213.6	0.0574
LG3	scaffold16-1219073	213.6	0.0781
LG3	scaffold178-1080540	214.38	0.0645
LG3	scaffold178-1001819	214.38	0.0238
LG3	scaffold16-648941	214.38	0.0325
LG3	scaffold351-522398	214.38	0.0574
LG3	scaffold16-652203	215.95	0.0243
LG3	scaffold16-800258	215.95	0.0401
LG3	scaffold351-347613	216.74	0.0401
LG3	scaffold551-359136	216.74	0.0247
LG3	scaffold314-187852	217.51	0.0079
LG3	scaffold16-367317	217.51	0.0547
LG3	scaffold351-525705	217.51	0.0703
LG3	scaffold510-243149	217.51	0.0078
LG3	scaffold351-497634	217.51	0.0313
LG3	scaffold351-398431	218.29	0
LG3	scaffold510-27058	218.29	0.016
LG3	scaffold314-60525	219.91	0.0399
LG3	scaffold293-372883	220.67	0
LG3	scaffold16-670704	220.67	0.0703
LG3	scaffold16-1345509	221.45	0.0159
LG3	scaffold91-2033894	223.09	0.049
LG3	scaffold214-41787	224.67	0.0241
LG3	scaffold293-439594	224.67	0.0081
LG3	scaffold91-1916593	224.67	0.0319
LG3	scaffold5026-92	227.04	0.0079
LG3	scaffold16-1475481	227.04	0.0238
LG3	scaffold16-810214	227.82	0
LG3	scaffold16-1345554	229.43	0.0591
LG3	scaffold155-68200	231.08	0.0325
LG3	scaffold314-368182	231.08	0.0393
LG3	scaffold16-916382	231.88	0.0168
LG3	scaffold293-372892	232.6	0.0248
LG3	scaffold91-1140755	235.98	0.0167
LG3	scaffold91-1205834	236.74	0
LG3	scaffold16-792013	240.9	0.0512
LG3	scaffold155-291369	241.38	0.0406
LG3	scaffold16-1377781	246.6	0
LG3	scaffold16-1332917	247.38	0
LG3	scaffold148-668978	251.45	0.0328
LG3	scaffold91-1799804	251.45	0.0398
LG3	scaffold228-1165876	252.24	0.0572
LG3	scaffold214-468775	252.24	0.0572
LG3	scaffold276-404446	253.04	0.0336
LG3	scaffold276-290913	253.04	0.0158
LG3	scaffold417-210563	253.82	0.0556
LG3	scaffold276-743697	253.82	0.0079
LG3	scaffold276-890803	253.82	0.0656
LG3	scaffold276-608800	253.82	0.0078
LG3	scaffold417-128094	253.82	0
LG3	scaffold361-185864	253.82	0.0236
LG3	scaffold276-768262	253.82	0
LG3	scaffold276-594096	253.82	0.0574
LG3	scaffold276-678092	254.46	0.066
LG3	scaffold417-148638	254.47	0.0481
LG3	scaffold276-690610	254.49	0.0626
LG3	scaffold417-127853	254.81	0
LG3	scaffold228-1456695	254.81	0.0151
LG3	scaffold91-1764691	254.81	0
LG3	scaffold91-1488156	256.47	0
LG3	scaffold214-233367	256.47	0.0079
LG3	scaffold518-184986	256.47	0
LG3	scaffold91-1148128	256.47	0.064
LG3	scaffold214-528185	257.25	0
LG3	scaffold91-1799613	257.25	0.0157
LG3	scaffold91-1148286	257.25	0.0569
LG3	scaffold518-86863	257.25	0.0315
LG3	scaffold276-434491	257.25	0.031
LG3	scaffold518-58504	257.25	0.0574
LG3	scaffold228-1243727	258.18	0.0385
LG3	scaffold91-1409109	258.18	0.0395
LG3	scaffold95-1755882	260.05	0
LG3	scaffold104-142706	260.05	0.0323
LG3	scaffold91-870034	260.05	0.065
LG3	scaffold518-299956	261.68	0.0254
LG3	scaffold870-114537	263.44	0.0169
LG3	scaffold276-454911	265.62	0.0427
LG3	scaffold42-88312	267.59	0.0489
LG3	scaffold191-71067	267.59	0.0158
LG3	scaffold417-148634	268.62	0.0085
LG3	scaffold228-1400826	272.08	0.0154
LG3	scaffold214-27049	273.64	0.0012
LG3	scaffold228-1377733	275.09	0.0406
LG3	scaffold251-292018	277.51	0.0406
LG3	scaffold304-978219	277.51	0.048
LG3	scaffold75-1176537	277.51	0
LG3	scaffold245-1019979	278.29	0.0317
LG3	scaffold595-63325	278.29	0.0551
LG3	scaffold159-817673	278.29	0.0551
LG3	scaffold304-893042	278.29	0.0569
LG3	scaffold245-1043514	279.08	0.0661
LG3	scaffold245-1020084	279.08	0
LG3	scaffold251-314377	279.86	0.0161
LG3	scaffold1062-2539	280.66	0.016
LG3	scaffold245-954849	281.86	0.0119
LG3	scaffold228-1331625	282.5	0.0447
LG3	scaffold417-163668	287.14	0.0325
LG3	scaffold104-216515	287.14	0.0166
LG3	scaffold276-455130	287.14	0.0323
LG3	scaffold276-891065	287.92	0.0246
LG3	scaffold276-743717	288.72	0.0344
LG3	scaffold276-605862	289.36	0.0507
LG3	scaffold304-1167334	293.69	0.0078
LG3	scaffold251-189577	294.49	0.0252
LG3	scaffold304-1135617	295.26	0.0335
LG3	scaffold304-1298813	296.06	0.008
LG3	scaffold245-1057375	296.86	0.0161
LG3	scaffold595-242923	298.43	0.032
LG3	scaffold159-211815	298.43	0
LG3	scaffold595-293071	299.22	0.016
LG3	scaffold457-186289	300.27	0.0298
LG3	scaffold595-20307	301.05	0.0142
LG3	scaffold159-323276	302.91	0.0564
LG3	scaffold457-246601	302.91	0.0556
LG3	scaffold159-212105	302.91	0.0479
LG3	scaffold457-83547	303.71	0.024
LG3	scaffold91-1785383	304.49	0.0323
LG3	scaffold457-164119	304.49	0.0574
LG3	scaffold159-567396	304.49	0.0163
LG3	scaffold42-300085	305.28	0.0578
LG3	scaffold361-112414	306.07	0
LG3	scaffold91-1890166	306.07	0.0234
LG3	scaffold159-562869	307.64	0.0156
LG3	scaffold457-27706	307.64	0
LG3	scaffold159-340104	308.43	0.0081
LG3	scaffold91-1926627	310.03	0
LG3	scaffold457-167246	310.03	0.0583
LG3	scaffold91-1203485	310.03	0.0407
LG3	scaffold29-116145	310.03	0.0579
LG3	scaffold457-297851	310.81	0.0483
LG3	scaffold91-1883376	311.6	0
LG3	scaffold91-1079818	311.6	0.0081
LG3	scaffold159-588901	313.23	0.0495
LG3	scaffold251-307211	313.98	0.0326
LG3	scaffold551-324370	313.98	0.0082
LG3	scaffold395-183886	313.98	0.0404
LG3	scaffold518-267757	314.76	0.0078
LG3	scaffold848-32719	314.76	0.0156
LG3	scaffold518-334131	314.76	0.0391
LG3	scaffold214-374066	315.54	0.008
LG3	scaffold251-218695	315.54	0.0236
LG3	scaffold457-314436	315.54	0.0569
LG3	scaffold314-292020	315.54	0.0159
LG3	scaffold29-99351	315.54	0.0656
LG3	scaffold214-798872	316.32	0.0397
LG3	scaffold29-239350	316.32	0
LG3	scaffold314-108262	316.32	0.0079
LG3	scaffold29-235113	316.32	0.0246
LG3	scaffold518-138865	317.11	0.0157
LG3	scaffold395-267794	317.11	0.0081
LG3	scaffold159-621354	317.89	0.0159
LG3	scaffold395-316239	318.68	0
LG3	scaffold304-1210468	319.46	0.0313
LG3	scaffold91-1115316	319.46	0.008
LG3	scaffold29-215436	319.46	0.0157
LG3	scaffold91-1201486	319.46	0.0163
LG3	scaffold351-387274	319.46	0.0317
LG3	scaffold595-17213	319.46	0.0156
LG3	scaffold245-948501	320.24	0.0551
LG3	scaffold351-264149	320.24	0.0233
LG3	scaffold214-759190	320.24	0.0315
LG3	scaffold65-1378536	320.24	0.0902
LG3	scaffold104-158861	320.24	0.0164
LG3	scaffold159-256361	321.03	0.0079
LG3	scaffold95-1924717	323.35	0.04
LG3	scaffold159-185721	323.35	0.0498
LG3	scaffold457-356767	323.35	0.025
LG3	scaffold395-264695	324.83	0
LG3	scaffold91-1110776	326.4	0.0079
LG3	scaffold159-748041	326.4	0.0236
LG3	scaffold29-264502	326.4	0.0079
LG3	scaffold395-460324	326.4	0.0078
LG3	scaffold159-221996	327.18	0
LG3	scaffold159-472466	327.18	0.0315
LG3	scaffold457-346963	327.18	0.0476
LG3	scaffold159-124087	327.96	0.0399
LG3	scaffold395-517184	328.75	0
LG3	scaffold29-77328	328.75	0.0492
LG3	scaffold75-1200570	329.53	0.016
LG3	scaffold314-326091	329.53	0.0079
LG3	scaffold304-1123316	329.53	0
LG3	scaffold314-145945	329.53	0
LG3	scaffold457-385762	329.53	0
LG3	scaffold214-823932	329.53	0.0079
LG3	scaffold457-54298	329.53	0.0081
LG3	scaffold245-693724	329.53	0.0333
LG3	scaffold159-171160	329.53	0.0161
LG3	scaffold251-251345	329.53	0.0078
LG3	scaffold314-94516	329.53	0.0242
LG3	scaffold361-212467	329.53	0.1557
LG3	scaffold395-341485	329.53	0.0238
LG3	scaffold178-1042336	329.53	0.016
LG3	scaffold395-257086	329.53	0.0078
LG3	scaffold251-168732	329.53	0.0157
LG3	scaffold159-131281	330.31	0.0158
LG3	scaffold29-168153	330.31	0.016
LG3	scaffold304-1209990	331.1	0.0407
LG3	scaffold304-1029385	331.1	0.0078
LG3	scaffold178-1042503	331.89	0.0236
LG3	scaffold42-300095	331.89	0.0569
LG3	scaffold159-708194	331.89	0.0416
LG3	scaffold551-324368	332.68	0
LG3	scaffold478-114297	333.46	0
LG3	scaffold551-324620	336.73	0.0166
LG3	scaffold251-539619	337.51	0.0162
LG3	scaffold551-201024	338.3	0.0574
LG3	scaffold314-326351	338.3	0.0082
LG3	scaffold95-1929890	339.87	0.0391
LG3	scaffold65-541759	339.87	0.0078
LG3	scaffold65-1500157	339.87	0.0159
LG3	scaffold65-1259212	339.87	0.0163
LG3	scaffold245-606066	340.65	0.0645
LG3	scaffold65-902144	340.65	0.0159
LG3	scaffold351-472759	340.65	0.0323
LG3	scaffold712-123668	340.65	0.0238
LG3	scaffold551-195741	341.44	0.0242
LG3	scaffold178-1042507	341.44	0.072
LG3	scaffold314-307337	341.44	0
LG3	scaffold314-194368	342.22	0.0236
LG3	scaffold351-395615	342.22	0.0236
LG3	scaffold65-1331839	342.22	0.0469
LG3	scaffold314-337970	343.01	0.0166
LG3	scaffold351-443014	343.8	0.0078
LG3	scaffold65-1162106	344.6	0.0588
LG3	scaffold314-112441	345.38	0
LG3	scaffold314-306397	345.38	0.0252
LG3	scaffold65-1406782	346.14	0.0164
LG3	scaffold65-896761	350.27	0.0397
LG3	scaffold712-123659	350.27	0
LG3	scaffold65-1274591	351.61	0.0535
LG3	scaffold42-90870	357.71	0.0462
LG3	scaffold191-232267	358.26	0.0311
LG3	scaffold214-445970	361.65	0.0429
LG3	scaffold148-881965	365.5	0.0078
LG3	scaffold95-1924735	366.3	0
LG3	scaffold148-328132	367.07	0.0481
LG3	scaffold42-267964	368.76	0.0645
LG3	scaffold276-813338	369.52	0.0247
LG3	scaffold148-650550	370.32	0.0404
LG3	scaffold65-485079	371.14	0.0155
LG3	scaffold65-566658	371.14	0.0239
LG3	scaffold644-132655	371.14	0.0158
LG3	scaffold269-708171	372.72	0.0078
LG3	scaffold65-425954	372.72	0.0388
LG3	scaffold228-1471960	373.51	0
LG3	scaffold65-228093	373.51	0.024
LG3	scaffold644-132660	373.51	0.0078
LG3	scaffold269-558551	374.29	0
LG3	scaffold457-107262	374.29	0.0407
LG3	scaffold644-132789	374.29	0.063
LG3	scaffold159-99542	374.29	0.0233
LG3	scaffold482-407895	375.07	0.0484
LG3	scaffold65-96651	375.07	0.024
LG3	scaffold276-755957	375.86	0.0157
LG3	scaffold518-319871	375.86	0.0719
LG3	scaffold417-131092	375.86	0.0319
LG3	scaffold65-650834	378.33	0.0611
LG3	scaffold269-654830	379.05	0.0417
LG3	scaffold457-308994	379.85	0.0487
LG3	scaffold457-342127	379.85	0.0638
LG3	scaffold457-308997	380.61	0.008
LG3	scaffold65-566937	381.4	0
LG3	scaffold65-228149	381.4	0.0496
LG3	scaffold65-417118	382.19	0.0578
LG3	scaffold65-649008	382.98	0
LG3	scaffold65-541870	382.98	0.0714
LG3	scaffold65-102334	383.76	0.0156
LG3	scaffold214-512366	383.76	0.0394
LG3	scaffold457-309191	384.59	0.0315
LG3	scaffold95-1841138	384.59	0.0313
LG3	scaffold457-308964	385.4	0.0568
LG3	scaffold159-124032	385.4	0.0336
LG3	scaffold269-465345	386.95	0.0672
LG3	scaffold510-359778	390.49	0.0424
LG3	scaffold551-153424	392	0.0512
LG3	scaffold76-1263777	392.76	0.0421
LG3	scaffold76-1228948	393.56	0.0093
LG3	scaffold870-83121	394.29	0.0474
LG3	scaffold76-1399753	394.29	0.0149
LG3	scaffold870-26748	395.13	0
LG3	scaffold276-892304	395.13	0.0313
LG3	scaffold482-308099	395.13	0.0672
LG3	scaffold482-174465	396.72	0.0499
LG3	scaffold482-307871	398.32	0.008
LG3	scaffold482-362303	398.32	0.0079
LG3	scaffold482-382925	399.91	0.032
LG3	scaffold510-392801	401.56	0.0317
LG3	scaffold510-75902	402.33	0.0413
LG3	scaffold510-244410	403.12	0.0413
LG3	scaffold510-239695	403.12	0.0156
LG3	scaffold510-364036	403.12	0.0472
LG3	scaffold510-123017	403.91	0.0409
LG3	scaffold314-108234	404.71	0
LG3	scaffold870-79960	407.15	0.0431
LG3	scaffold510-275106	412.46	0
LG4	scaffold395-171795	0	0
LG4	scaffold518-86882	1.64	0
LG4	scaffold214-602008	9.38	0.0259
LG4	scaffold214-690724	9.38	0.0104
LG4	scaffold242-83959	10.89	0.035
LG4	scaffold91-571190	12.51	0.0323
LG4	scaffold750-132580	12.51	0.0159
LG4	scaffold148-668663	12.51	0
LG4	scaffold228-1477541	12.51	0.0159
LG4	scaffold148-350095	13.26	0.0084
LG4	scaffold228-1324689	13.26	0.0164
LG4	scaffold214-543388	14.91	0.0153
LG4	scaffold351-179016	14.91	0.0638
LG4	scaffold351-223711	17.26	0
LG4	scaffold478-96335	17.26	0.008
LG4	scaffold95-1929929	19.74	0.0323
LG4	scaffold228-1189180	20.51	0.0159
LG4	scaffold214-431117	20.51	0.0163
LG4	scaffold457-314449	22.08	0.042
LG4	scaffold75-1157115	24.11	0.0207
LG4	scaffold351-506580	24.11	0.0126
LG4	scaffold65-1050098	25.35	0.0465
LG4	scaffold228-1276021	25.35	0.0149
LG4	scaffold228-1377974	26.24	0
LG4	scaffold228-1471662	26.24	0
LG4	scaffold148-764244	26.24	0
LG4	scaffold532-191036	26.24	0.0155
LG4	scaffold65-968105	26.24	0.0164
LG4	scaffold214-682323	26.24	0.0391
LG4	scaffold320-236947	27.02	0.0157
LG4	scaffold595-278317	27.81	0.0236
LG4	scaffold214-805562	27.81	0.016
LG4	scaffold95-1795454	27.81	0.0579
LG4	scaffold178-1063886	27.81	0.0569
LG4	scaffold351-147011	27.81	0.0391
LG4	scaffold750-130542	27.81	0
LG4	scaffold457-305752	28.59	0.0156
LG4	scaffold627-250301	28.59	0.0155
LG4	scaffold65-1329037	28.59	0
LG4	scaffold95-1613398	28.59	0
LG4	scaffold65-384022	28.59	0
LG4	scaffold245-814072	28.59	0
LG4	scaffold148-785441	29.38	0.0327
LG4	scaffold750-93538	30.17	0.0403
LG4	scaffold65-1465035	30.17	0.0315
LG4	scaffold75-984501	30.17	0.0403
LG4	scaffold95-1827441	30.17	0
LG4	scaffold228-1291619	30.96	0.0079
LG4	scaffold395-316227	31.74	0.0313
LG4	scaffold712-80009	31.74	0.0159
LG4	scaffold351-506576	32.54	0.0077
LG4	scaffold159-800476	32.54	0
LG4	scaffold65-1240087	34.13	0
LG4	scaffold750-117935	34.91	0
LG4	scaffold91-376156	37.08	0.058
LG4	scaffold159-81192	37.08	0.027
LG4	scaffold794-40852	37.08	0.0261
LG4	scaffold4225-72	37.67	0.0245
LG4	scaffold245-744942	38.46	0.0079
LG4	scaffold65-1259191	38.46	0.0079
LG4	scaffold214-410117	38.46	0
LG4	scaffold659-11929	38.46	0
LG4	scaffold65-485034	38.46	0
LG4	scaffold251-563659	38.46	0.0167
LG4	scaffold245-1109956	39.24	0.0233
LG4	scaffold91-314281	39.24	0.0081
LG4	scaffold457-400847	39.24	0
LG4	scaffold228-1174648	39.24	0
LG4	scaffold395-310010	39.24	0
LG4	scaffold245-562689	39.24	0
LG4	scaffold457-412605	39.24	0
LG4	scaffold245-1088471	39.24	0
LG4	scaffold242-150516	40.01	0.0083
LG4	scaffold214-392939	40.79	0.0079
LG4	scaffold148-709810	40.79	0
LG4	scaffold214-710433	42.42	0.0249
LG4	scaffold351-522442	43.2	0.032
LG4	scaffold351-178510	43.2	0.024
LG4	scaffold214-627891	43.2	0.008
LG4	scaffold228-1165952	43.98	0.0081
LG4	scaffold245-562930	44.78	0.0161
LG4	scaffold77-1319539	44.78	0.0079
LG4	scaffold75-1028592	45.57	0.032
LG4	scaffold627-202484	45.57	0.024
LG4	scaffold525-356610	45.57	0.0238
LG4	scaffold178-1080541	45.57	0.0496
LG4	scaffold159-724697	46.32	0.0495
LG4	scaffold65-293090	47.94	0.0237
LG4	scaffold65-872667	47.94	0.0239
LG4	scaffold65-590580	47.94	0.0081
LG4	scaffold214-207684	50.36	0.0159
LG4	scaffold228-1377681	51.94	0.0239
LG4	scaffold245-843207	51.94	0.0159
LG4	scaffold395-309811	52.74	0.041
LG4	scaffold478-29482	53.86	0.0473
LG4	scaffold243-700047	54.66	0.0048
LG4	scaffold214-535871	55.76	0.0328
LG4	scaffold91-208559	55.76	0
LG4	scaffold65-167434	56.55	0.0247
LG4	scaffold712-56375	57.32	0.0416
LG4	scaffold351-252524	58.95	0.008
LG4	scaffold525-379598	58.95	0
LG4	scaffold518-299695	58.95	0.0081
LG4	scaffold214-644517	60.54	0.0163
LG4	scaffold91-102420	61.32	0
LG4	scaffold243-768871	61.32	0.0391
LG4	scaffold159-880371	62.1	0.0397
LG4	scaffold65-284989	62.1	0
LG4	scaffold214-144666	62.89	0.017
LG4	scaffold245-1043520	63.68	0.05
LG4	scaffold457-198880	63.68	0.0404
LG4	scaffold148-301894	63.68	0.0488
LG4	scaffold351-347361	63.68	0.0167
LG4	scaffold95-1857021	63.68	0.0397
LG4	scaffold148-702456	63.68	0.0488
LG4	scaffold29-258072	63.68	0.0312
LG4	scaffold243-692593	63.68	0.016
LG4	scaffold228-1476392	64.46	0.0488
LG4	scaffold228-1243209	64.46	0.0492
LG4	scaffold228-1617441	64.46	0.016
LG4	scaffold65-1050067	64.46	0.0159
LG4	scaffold95-1728734	65.27	0.0244
LG4	scaffold228-1617397	66.06	0.0415
LG4	scaffold457-263260	66.06	0.0327
LG4	scaffold478-88091	66.84	0.0411
LG4	scaffold148-938848	66.84	0.0159
LG4	scaffold228-1220967	68.46	0.0165
LG4	scaffold245-612111	69.85	0.0344
LG4	scaffold159-266100	69.85	0.0187
LG4	scaffold457-223154	70.64	0.0426
LG4	scaffold228-1248509	71.22	0
LG4	scaffold518-245788	71.22	0.0083
LG4	scaffold518-299667	71.22	0.0078
LG4	scaffold148-362578	72	0.04
LG4	scaffold518-116378	72	0
LG4	scaffold29-358488	72	0
LG4	scaffold178-1090291	72	0.0079
LG4	scaffold148-366184	72.78	0.0079
LG4	scaffold242-231029	72.78	0.0078
LG4	scaffold75-1176751	72.78	0.0078
LG4	scaffold159-265904	72.78	0.0078
LG4	scaffold65-1240029	72.78	0.031
LG4	scaffold65-682843	72.78	0.0246
LG4	scaffold91-547670	72.78	0.0079
LG4	scaffold395-68421	72.78	0
LG4	scaffold245-999089	72.78	0.0238
LG4	scaffold95-1753281	72.78	0.0391
LG4	scaffold159-800448	72.78	0.0323
LG4	scaffold251-641415	74.36	0
LG4	scaffold457-107274	74.36	0
LG4	scaffold159-805141	75.14	0
LG4	scaffold228-1248521	75.14	0.0157
LG4	scaffold580-12506	75.14	0
LG4	scaffold75-1143484	75.14	0.0159
LG4	scaffold245-814069	75.14	0.0317
LG4	scaffold65-994939	75.92	0.048
LG4	scaffold159-338117	75.92	0
LG4	scaffold75-1043589	75.92	0.0783
LG4	scaffold29-193588	75.92	0.0246
LG4	scaffold228-1383240	75.92	0.048
LG4	scaffold518-170652	75.92	0.0082
LG4	scaffold65-898048	75.92	0.0078
LG4	scaffold242-180897	75.92	0.041
LG4	scaffold214-138682	76.71	0.0081
LG4	scaffold245-794883	77.5	0.0417
LG4	scaffold148-318233	77.5	0.0238
LG4	scaffold351-275848	77.5	0.0242
LG4	scaffold95-1924690	78.29	0.0163
LG4	scaffold243-705600	78.29	0.0565
LG4	scaffold395-103289	79.23	0
LG4	scaffold214-646591	80.17	0
LG4	scaffold75-1134432	80.17	0.0325
LG4	scaffold29-99319	81.11	0.008
LG4	scaffold659-192373	82.06	0
LG4	scaffold395-481468	83	0
LG4	scaffold580-64021	83.78	0.0081
LG4	scaffold159-616539	83.78	0
LG4	scaffold178-994867	85.37	0.0319
LG4	scaffold65-200011	85.37	0.0235
LG4	scaffold525-357157	85.37	0.0077
LG4	scaffold595-252910	86.16	0.0328
LG4	scaffold65-417300	86.16	0.0238
LG4	scaffold794-75900	87.74	0.0248
LG4	scaffold214-386865	87.74	0.0315
LG4	scaffold159-896199	88.52	0
LG4	scaffold65-1171645	88.52	0.0413
LG4	scaffold395-378945	89.3	0
LG4	scaffold65-904766	89.3	0.0579
LG4	scaffold65-244958	89.3	0.04
LG4	scaffold395-247830	90.09	0.0325
LG4	scaffold65-274954	90.89	0.0163
LG4	scaffold214-837698	91.67	0.0165
LG4	scaffold395-280508	91.67	0
LG4	scaffold532-223011	91.67	0.041
LG4	scaffold65-1050344	92.46	0.065
LG4	scaffold251-530417	92.46	0.0328
LG4	scaffold75-1149402	92.46	0.0315
LG4	scaffold148-271673	92.46	0
LG4	scaffold395-301161	92.46	0.0323
LG4	scaffold351-147304	94.84	0.0157
LG4	scaffold214-99813	94.84	0
LG4	scaffold95-1898651	94.84	0.031
LG4	scaffold214-662837	94.84	0.0081
LG4	scaffold457-340217	94.84	0.0078
LG4	scaffold351-267311	94.84	0
LG4	scaffold148-688662	94.84	0.0236
LG4	scaffold228-1243231	94.84	0.0079
LG4	scaffold245-928796	94.84	0.0488
LG4	scaffold214-231586	95.62	0
LG4	scaffold245-1060919	95.62	0.0238
LG4	scaffold65-305702	96.4	0.0079
LG4	scaffold214-543119	96.4	0
LG4	scaffold242-124317	97.18	0.0246
LG4	scaffold29-118246	98.63	0.0594
LG4	scaffold148-271492	98.63	0.0177
LG4	scaffold75-1077661	98.63	0.0434
LG4	scaffold712-119604	100.06	0.0242
LG4	scaffold65-1316635	100.06	0.0164
LG4	scaffold478-124597	100.06	0.0242
LG4	scaffold148-942418	100.06	0.0161
LG4	scaffold214-795037	100.83	0.0167
LG4	scaffold580-98852	102.44	0.0241
LG4	scaffold228-1174428	102.44	0.0672
LG4	scaffold159-555404	103.22	0
LG4	scaffold95-1728911	103.22	0.0397
LG4	scaffold395-103281	103.22	0.0157
LG4	scaffold65-526734	104	0.0155
LG4	scaffold75-1109560	104	0.008
LG4	scaffold148-311282	104	0.0323
LG4	scaffold95-1872096	104	0.0078
LG4	scaffold65-650886	104	0.0394
LG4	scaffold159-519183	104	0.0079
LG4	scaffold750-67530	104	0
LG4	scaffold228-1542104	104.78	0
LG4	scaffold214-138816	104.78	0
LG4	scaffold245-1060947	104.78	0.0156
LG4	scaffold525-539664	104.78	0.008
LG4	scaffold91-573970	104.78	0
LG4	scaffold712-87365	104.78	0
LG4	scaffold148-688438	104.78	0.0079
LG4	scaffold228-1617228	104.78	0.0565
LG4	scaffold245-792440	104.78	0
LG4	scaffold29-121377	105.57	0
LG4	scaffold395-309699	105.57	0.0234
LG4	scaffold77-1084290	105.57	0.0079
LG4	scaffold159-333839	106.35	0.0233
LG4	scaffold214-27089	106.35	0.0242
LG4	scaffold395-302403	106.35	0.0387
LG4	scaffold29-295708	107.93	0.0158
LG4	scaffold84-1238698	107.93	0.016
LG4	scaffold95-1546493	108.71	0
LG4	scaffold228-1299037	108.71	0.0556
LG4	scaffold214-179975	108.71	0.0156
LG4	scaffold518-379572	109.41	0.0418
LG4	scaffold65-1346125	112.75	0
LG4	scaffold65-359240	112.75	0.0161
LG4	scaffold75-1109614	115.2	0.0242
LG4	scaffold29-344143	116.84	0.0341
LG4	scaffold351-389700	117.61	0
LG4	scaffold214-420807	118.4	0.0079
LG4	scaffold243-737626	120.82	0.032
LG4	scaffold95-1584545	120.82	0.0578
LG4	scaffold228-1361944	120.82	0.0082
LG4	scaffold214-450752	122.4	0.0492
LG4	scaffold75-1065458	122.4	0.041
LG4	scaffold214-673549	122.4	0.0325
LG4	scaffold6-26332	122.4	0.0496
LG4	scaffold75-1028698	122.4	0.0496
LG4	scaffold65-190755	123.22	0.0237
LG4	scaffold395-68127	123.22	0.0809
LG4	scaffold395-10497	123.22	0.0248
LG4	scaffold228-1165968	123.22	0.0641
LG4	scaffold65-384021	127.31	0.0237
LG4	scaffold214-805719	127.31	0.0248
LG4	scaffold148-937805	128.09	0
LG4	scaffold75-1043367	131.3	0.0082
LG4	scaffold214-805686	131.3	0
LG4	scaffold320-199983	132.87	0.032
LG4	scaffold242-256259	132.87	0.0244
LG4	scaffold159-555313	133.65	0.0244
LG4	scaffold214-589209	133.65	0.0238
LG4	scaffold65-896654	133.65	0
LG4	scaffold228-1243233	134.44	0.0159
LG4	scaffold395-302591	134.44	0.0476
LG4	scaffold245-852840	134.44	0.0155
LG4	scaffold159-851061	134.44	0.0078
LG4	scaffold148-702504	134.44	0.0684
LG4	scaffold251-559536	134.44	0.0551
LG4	scaffold395-264716	134.44	0
LG4	scaffold159-480540	134.44	0.032
LG4	scaffold245-938440	134.44	0.0238
LG4	scaffold457-252626	134.44	0
LG4	scaffold457-215994	134.44	0.0159
LG4	scaffold159-694555	135.23	0
LG4	scaffold351-417788	135.23	0.0154
LG4	scaffold457-50883	136.02	0.008
LG4	scaffold65-1478335	138.45	0.0079
LG4	scaffold627-242734	138.45	0
LG4	scaffold457-364231	139.23	0.0159
LG4	scaffold95-1735515	139.23	0.0328
LG4	scaffold65-1019712	140.91	0.0475
LG4	scaffold178-1126074	140.91	0.0226
LG4	scaffold457-206696	141.91	0.0733
LG4	scaffold159-869763	141.91	0.0153
LG4	scaffold75-1200511	142.81	0.0325
LG4	scaffold518-106380	142.81	0.0938
LG4	scaffold75-1028841	142.81	0.0625
LG4	scaffold159-774466	144.33	0.0403
LG4	scaffold351-525665	144.33	0.0248
LG4	scaffold65-590315	144.33	0.0086
LG4	scaffold148-906780	145.05	0.0158
LG4	scaffold214-382952	145.05	0.0317
LG4	scaffold395-41895	145.05	0.0472
LG4	scaffold251-598938	147.53	0.0415
LG4	scaffold214-649675	148.22	0.0323
LG4	scaffold242-98652	148.22	0.0326
LG4	scaffold245-842978	149	0.0495
LG4	scaffold29-118480	149	0.041
LG4	scaffold395-481440	149.76	0.0583
LG4	scaffold65-992643	149.76	0.0081
LG4	scaffold214-756627	149.76	0.008
LG4	scaffold65-425618	149.76	0.0157
LG4	scaffold532-177332	149.76	0.0488
LG4	scaffold395-248054	149.76	0.0244
LG4	scaffold214-667890	150.54	0.0407
LG4	scaffold518-278630	150.54	0.032
LG4	scaffold242-285063	150.54	0.0078
LG4	scaffold29-99588	150.54	0.0081
LG4	scaffold395-108589	150.54	0.0574
LG4	scaffold245-1038750	150.54	0.072
LG4	scaffold395-248061	150.54	0.0236
LG4	scaffold228-1542000	151.32	0.0159
LG4	scaffold351-113106	151.32	0.0156
LG4	scaffold65-1324449	151.32	0.0159
LG4	scaffold251-598947	151.32	0.0159
LG4	scaffold29-371386	151.32	0.0397
LG4	scaffold148-292779	151.32	0
LG4	scaffold29-80186	151.32	0
LG4	scaffold351-389910	151.32	0
LG4	scaffold457-385598	151.32	0.0323
LG4	scaffold65-228018	152.89	0.0469
LG4	scaffold243-679378	152.89	0
LG4	scaffold159-327441	152.89	0.0732
LG4	scaffold320-250478	153.69	0.0721
LG4	scaffold65-1019661	153.69	0.0079
LG4	scaffold627-206365	153.69	0.0319
LG4	scaffold351-530085	154.48	0.0315
LG4	scaffold395-47105	154.48	0
LG4	scaffold457-301662	156.07	0.0393
LG4	scaffold148-417441	156.07	0.016
LG4	scaffold214-451053	156.07	0.0078
LG4	scaffold29-347724	156.85	0.0388
LG4	scaffold228-1365710	156.85	0.0469
LG4	scaffold159-715603	156.85	0
LG4	scaffold65-1013200	158.43	0
LG4	scaffold65-1073965	160	0.0079
LG4	scaffold29-80173	160	0.0156
LG4	scaffold214-387244	160.79	0.0078
LG4	scaffold518-278863	161.5	0.0422
LG4	scaffold351-442825	164.83	0
LG4	scaffold351-249491	164.83	0.0476
LG4	scaffold351-147441	168.04	0
LG4	scaffold395-126372	170.48	0.0323
LG4	scaffold65-1390794	171.24	0.0162
LG4	scaffold243-661180	172.02	0.025
LG4	scaffold159-519226	173.62	0.0079
LG4	scaffold395-28658	174.41	0.0787
LG4	scaffold29-395689	174.41	0.0243
LG4	scaffold245-1038939	175.2	0.041
LG4	scaffold65-1013248	175.98	0.0664
LG4	scaffold29-395928	175.98	0.0082
LG4	scaffold75-984523	178.33	0.0249
LG4	scaffold518-278716	179.08	0.0712
LG4	scaffold712-127456	179.95	0
LG4	scaffold222-19474	179.95	0.0165
LG4	scaffold251-506473	179.95	0.0325
LG4	scaffold395-153238	179.95	0.0472
LG4	scaffold251-598921	180.74	0.0317
LG4	scaffold65-167170	181.55	0.0386
LG4	scaffold214-88836	181.55	0.0484
LG4	scaffold214-259084	181.55	0.0661
LG4	scaffold251-599236	182.3	0.0259
LG4	scaffold245-508833	185.61	0
LG4	scaffold245-692209	186.4	0.0083
LG4	scaffold65-366545	194.08	0
LG4	scaffold65-822618	194.87	0.0079
LG4	scaffold351-183638	198.22	0.0567
LG4	scaffold351-525484	198.22	0.0226
LG4	scaffold75-1157424	205.85	0.042
LG4	scaffold750-64772	205.85	0
LG4	scaffold251-644259	206.54	0.0329
LG4	scaffold95-1988942	211.63	0.0081
LG4	scaffold95-1988916	211.63	0
LG4	scaffold242-65524	214.08	0.0333
LG4	scaffold178-1042234	216.57	0.0079
LG4	scaffold65-262142	217.37	0.0574
LG4	scaffold750-63422	218.16	0
LG5	scaffold26-2248352	0	0
LG5	scaffold474-351318	0	0.0079
LG5	scaffold75-359417	1.64	0.0157
LG5	scaffold60-1257510	4.08	0.0472
LG5	scaffold220-116734	4.08	0.04
LG5	scaffold154-274583	4.08	0
LG5	scaffold108-1725713	5.68	0.008
LG5	scaffold108-1423080	7.29	0.025
LG5	scaffold102-66209	7.34	0.0474
LG5	scaffold51-2734624	7.34	0.0714
LG5	scaffold154-300698	7.34	0.0238
LG5	scaffold490-228219	8.18	0.016
LG5	scaffold108-1672772	8.18	0.0317
LG5	scaffold108-1529410	8.18	0.0325
LG5	scaffold154-193732	8.18	0.0234
LG5	scaffold175-69296	8.96	0.0233
LG5	scaffold205-679469	8.96	0.0157
LG5	scaffold670-267416	8.96	0.0233
LG5	scaffold75-302624	8.96	0
LG5	scaffold154-111718	8.96	0.0236
LG5	scaffold60-1257499	10.54	0
LG5	scaffold108-1831081	11.32	0.0242
LG5	scaffold60-1524113	11.32	0.0078
LG5	scaffold108-1414851	12.11	0.032
LG5	scaffold47-1403155	12.11	0.0569
LG5	scaffold108-1511606	12.11	0.024
LG5	scaffold108-1713557	12.11	0.0403
LG5	scaffold108-1123874	12.89	0.0574
LG5	scaffold60-1337408	12.89	0
LG5	scaffold26-2787850	13.69	0.0243
LG5	scaffold108-1594595	14.26	0.0656
LG5	scaffold539-320101	14.26	0.0348
LG5	scaffold48-708350	14.26	0.0506
LG5	scaffold411-613674	20.2	0.0205
LG5	scaffold411-576742	20.2	0.0288
LG5	scaffold411-252806	23.02	0.0165
LG5	scaffold411-87401	23.81	0.0593
LG5	scaffold469-382572	24.59	0.0161
LG5	scaffold411-252733	24.59	0.032
LG5	scaffold411-472446	25.38	0.0156
LG5	scaffold411-382653	25.38	0.0159
LG5	scaffold572-186608	25.38	0.032
LG5	scaffold779-16789	25.38	0.0236
LG5	scaffold411-301837	26.97	0.0081
LG5	scaffold60-1547015	27.76	0.0156
LG5	scaffold60-1175990	27.76	0.0313
LG5	scaffold60-1524039	27.76	0.0469
LG5	scaffold60-1257242	28.54	0.032
LG5	scaffold60-1175819	28.54	0.0078
LG5	scaffold60-1176013	29.33	0.0241
LG5	scaffold60-1030405	30.12	0
LG5	scaffold411-455549	30.9	0.0239
LG5	scaffold411-384357	30.9	0.0239
LG5	scaffold411-401280	31.69	0.0078
LG5	scaffold572-81955	31.69	0.0156
LG5	scaffold411-360544	31.69	0.0394
LG5	scaffold411-474229	32.47	0
LG5	scaffold504-247130	32.47	0.0317
LG5	scaffold411-716489	34.05	0.0315
LG5	scaffold572-85659	34.05	0.0079
LG5	scaffold469-393067	34.05	0.0233
LG5	scaffold411-731160	34.05	0.0078
LG5	scaffold411-188886	34.91	0.0313
LG5	scaffold469-393394	34.91	0.0477
LG5	scaffold102-116965	35.78	0.0153
LG5	scaffold101-254599	35.78	0.0578
LG5	scaffold302-345079	35.78	0.0323
LG5	scaffold60-1533314	38.2	0.032
LG5	scaffold60-1513320	38.2	0.0238
LG5	scaffold60-1069689	38.2	0.008
LG5	scaffold572-233475	38.2	0.0159
LG5	scaffold108-1215931	38.98	0.0732
LG5	scaffold60-1531851	38.98	0.0078
LG5	scaffold60-1178880	38.98	0.0163
LG5	scaffold572-112060	39.77	0.0247
LG5	scaffold60-1288226	40.57	0.0327
LG5	scaffold60-1213525	41.35	0.0164
LG5	scaffold60-1189073	42.98	0.0078
LG5	scaffold411-106684	44.58	0.0315
LG5	scaffold411-301631	44.58	0.0236
LG5	scaffold572-116258	44.58	0.0078
LG5	scaffold782-96741	46	0.0585
LG5	scaffold469-68744	46	0.0248
LG5	scaffold411-751662	46	0.0333
LG5	scaffold469-431902	47.51	0.0415
LG5	scaffold302-473608	48.28	0.033
LG5	scaffold101-251486	49.01	0
LG5	scaffold514-147111	49.8	0.0078
LG5	scaffold514-147404	49.8	0.0078
LG5	scaffold101-763075	49.8	0.0078
LG5	scaffold302-408452	49.8	0.0407
LG5	scaffold148-196944	50.55	0.0162
LG5	scaffold946-104374	50.55	0.016
LG5	scaffold302-458547	50.55	0.0082
LG5	scaffold514-290845	51.31	0.0322
LG5	scaffold469-99930	52.07	0.0081
LG5	scaffold699-111551	52.07	0.0159
LG5	scaffold514-381835	52.86	0.0162
LG5	scaffold101-763011	53.62	0.0079
LG5	scaffold690-343438	53.62	0.0323
LG5	scaffold411-438497	53.62	0.0236
LG5	scaffold632-184449	54.41	0.0157
LG5	scaffold302-338514	55.2	0.0238
LG5	scaffold699-178366	55.2	0.0157
LG5	scaffold632-20619	55.2	0
LG5	scaffold699-73124	55.2	0.0234
LG5	scaffold319-375610	57.58	0.0079
LG5	scaffold319-410349	57.58	0.0233
LG5	scaffold245-290441	57.58	0.0394
LG5	scaffold319-573263	57.58	0.0078
LG5	scaffold691-232657	58.36	0.024
LG5	scaffold245-164280	58.36	0.0081
LG5	scaffold319-659487	58.36	0.0079
LG5	scaffold319-659629	58.36	0.008
LG5	scaffold699-178688	58.36	0.0397
LG5	scaffold72-1149916	58.36	0.0078
LG5	scaffold319-262412	58.36	0
LG5	scaffold539-186983	58.36	0.0078
LG5	scaffold127-1216551	58.36	0
LG5	scaffold632-263480	58.36	0.0233
LG5	scaffold316-518371	59.14	0.0236
LG5	scaffold514-392067	59.14	0.0079
LG5	scaffold127-995927	59.14	0.0079
LG5	scaffold367-639489	59.93	0.008
LG5	scaffold302-42269	60.72	0.032
LG5	scaffold622-74406	60.72	0.0079
LG5	scaffold127-1051505	60.72	0.016
LG5	scaffold946-104432	60.72	0.0081
LG5	scaffold691-229619	60.72	0.0155
LG5	scaffold699-113831	60.72	0
LG5	scaffold446-125767	61.51	0.0387
LG5	scaffold446-403010	61.51	0.0078
LG5	scaffold47-1403156	68.15	0.0163
LG5	scaffold26-1711038	68.15	0.0159
LG5	scaffold46-925043	69.74	0
LG5	scaffold819-88777	71.31	0
LG5	scaffold670-100479	71.31	0
LG5	scaffold490-197774	72.1	0.0252
LG5	scaffold312-764726	74.64	0
LG5	scaffold75-65625	85.61	0.0271
LG5	scaffold101-37706	86.17	0.0108
LG5	scaffold49-386346	89.49	0.0436
LG5	scaffold102-263942	94.9	0
LG5	scaffold319-430198	94.9	0.008
LG5	scaffold102-107228	97.65	0.0317
LG5	scaffold26-2912952	102.62	0.0078
LG5	scaffold48-784389	103.41	0
LG5	scaffold101-712015	104.19	0
LG5	scaffold26-2047523	104.19	0.0079
LG5	scaffold552-225283	104.19	0.032
LG5	scaffold26-1586661	104.19	0.0234
LG5	scaffold514-417944	104.19	0.0388
LG5	scaffold474-338870	104.97	0
LG5	scaffold101-142131	105.76	0.0165
LG5	scaffold483-115230	105.76	0.0079
LG5	scaffold51-1875196	105.76	0
LG5	scaffold469-111075	105.76	0.064
LG5	scaffold60-1216050	106.54	0.0081
LG5	scaffold220-185298	106.54	0.0472
LG5	scaffold60-1216065	106.54	0.0248
LG5	scaffold48-470971	107.33	0.0079
LG5	scaffold51-2436239	109.19	0.0081
LG5	scaffold75-124851	109.19	0
LG5	scaffold201-868173	113.07	0.0247
LG5	scaffold367-348018	113.8	0
LG5	scaffold26-2087248	114.58	0.0159
LG5	scaffold514-337790	114.58	0.016
LG5	scaffold632-153058	114.58	0
LG5	scaffold148-123382	115.36	0.0156
LG5	scaffold51-2286366	115.36	0
LG5	scaffold48-288845	115.36	0.0236
LG5	scaffold334-481579	115.36	0.0079
LG5	scaffold54-1151066	115.36	0.0775
LG5	scaffold514-448445	116.15	0.0083
LG5	scaffold400-86472	116.95	0.0083
LG5	scaffold26-2366048	118.41	0.0092
LG5	scaffold60-1171058	118.41	0.0341
LG5	scaffold26-1871085	118.41	0.0582
LG5	scaffold101-866278	119.11	0.0152
LG5	scaffold49-78435	119.11	0.0555
LG5	scaffold354-285344	119.95	0.0079
LG5	scaffold108-2090134	120.73	0.0234
LG5	scaffold51-2296632	120.73	0.024
LG5	scaffold101-265109	120.73	0.0565
LG5	scaffold108-2081536	120.73	0.0234
LG5	scaffold60-1327932	120.73	0
LG5	scaffold101-260849	121.52	0.0159
LG5	scaffold60-1522132	122.31	0.0315
LG5	scaffold108-2024285	122.31	0.0078
LG5	scaffold75-158229	122.31	0.0081
LG5	scaffold483-132393	123.09	0.0492
LG5	scaffold46-939403	123.09	0.0242
LG5	scaffold75-423574	123.09	0.0235
LG5	scaffold411-606056	123.09	0.0235
LG5	scaffold490-387646	123.88	0.0159
LG5	scaffold108-1388655	125.49	0
LG5	scaffold154-480245	127.07	0.0547
LG5	scaffold514-191147	127.07	0
LG5	scaffold46-1005887	127.07	0.0157
LG5	scaffold154-190165	127.86	0.0158
LG5	scaffold493-230190	128.64	0.0081
LG5	scaffold51-1766098	128.64	0.016
LG5	scaffold101-830654	129.42	0.0234
LG5	scaffold205-314274	129.42	0.0158
LG5	scaffold108-1367826	130.22	0.0726
LG5	scaffold539-310662	130.22	0.0077
LG5	scaffold101-348920	130.22	0.0397
LG5	scaffold411-605728	130.22	0.041
LG5	scaffold411-764620	131.81	0.0161
LG5	scaffold51-1928954	131.81	0.0403
LG5	scaffold49-147602	131.81	0
LG5	scaffold47-1363891	132.6	0.032
LG5	scaffold75-203360	132.6	0.0246
LG5	scaffold205-494839	134.2	0.0077
LG5	scaffold46-1064849	135.6	0.0431
LG5	scaffold49-1586902	135.6	0.034
LG5	scaffold49-78463	136.4	0.0184
LG5	scaffold411-776677	136.97	0.0164
LG5	scaffold119-719685	138.58	0.0244
LG5	scaffold26-2351060	138.58	0.0645
LG5	scaffold51-1664908	138.58	0
LG5	scaffold101-639508	139.36	0.0246
LG5	scaffold504-74657	139.36	0.0164
LG5	scaffold411-776908	139.36	0.0159
LG5	scaffold47-1438668	140.15	0
LG5	scaffold670-41754	140.15	0.0159
LG5	scaffold647-123094	140.15	0.0397
LG5	scaffold51-2619118	140.93	0
LG5	scaffold75-126679	141.72	0.0244
LG5	scaffold1475-3359	141.72	0.0079
LG5	scaffold26-2662040	141.72	0.025
LG5	scaffold400-215996	142.5	0.0322
LG5	scaffold469-242228	143.29	0.0078
LG5	scaffold26-2517786	143.29	0
LG5	scaffold493-78311	143.29	0
LG5	scaffold504-220338	144.07	0.0078
LG5	scaffold101-527993	144.07	0.0078
LG5	scaffold101-763049	144.07	0.0078
LG5	scaffold220-177591	144.07	0.0163
LG5	scaffold690-287070	144.07	0
LG5	scaffold375-60712	144.07	0
LG5	scaffold302-396216	144.07	0
LG5	scaffold483-132574	144.07	0
LG5	scaffold469-175948	144.07	0.0323
LG5	scaffold101-682375	144.07	0.0079
LG5	scaffold539-345256	144.07	0.0315
LG5	scaffold51-1929216	144.85	0
LG5	scaffold26-1849159	144.85	0.0157
LG5	scaffold46-970233	144.85	0.0476
LG5	scaffold102-45032	145.64	0.0397
LG5	scaffold75-302552	145.64	0.0159
LG5	scaffold75-66759	145.64	0.0079
LG5	scaffold842-12496	145.64	0
LG5	scaffold51-2312437	145.64	0
LG5	scaffold952-75227	146.42	0.0079
LG5	scaffold201-872007	147.21	0
LG5	scaffold26-2591081	147.21	0.0079
LG5	scaffold722-163949	149.59	0.0078
LG5	scaffold205-556856	149.59	0.0236
LG5	scaffold51-2273498	149.59	0.0079
LG5	scaffold483-119759	149.59	0
LG5	scaffold26-2473047	149.59	0
LG5	scaffold469-206070	150.37	0
LG5	scaffold670-88428	151.16	0.0242
LG5	scaffold148-12680	151.16	0.0397
LG5	scaffold47-1464905	151.16	0.0504
LG5	scaffold101-291748	151.94	0.0317
LG5	scaffold474-397085	151.94	0.0403
LG5	scaffold670-41955	151.94	0.0242
LG5	scaffold220-191393	151.94	0.0236
[truncated: 8,152 more rows]

## Sheet: Table S3
Table S3. Detailed information about the distribution of genes involved in immunity. BLAST analysis showed that 1,274 immunity-related genes were identified.
Chromosome	Gene_ID	Start	End	Align_ratio	Strand	Description
chr1	Lcro_GLEAN_10008053	314370	335472	0.499658	+	IPR003961; Fibronectin, type III	GO:0005515; protein binding; Molecular Function	K05064 IL12RB2; interleukin 12 receptor beta-2 K05064 Environmental Information Processing; Signal Transduction; Jak-STAT signaling pathway [PATH:ko04630] Environmental Information Processing; Signaling Molecules and Interaction; Cytokine-cytokine receptor interaction [PATH:ko04060]	Interleukin-12 receptor subunit beta-2	Class I helical cytokine receptor number 25
chr1	Lcro_GLEAN_10015241	1703952	1705871	0.99976	+	IPR001190; Speract/scavenger receptor IPR011705; BTB/Kelch-associated IPR017448; Speract/scavenger receptor-related	GO:0005044; scavenger receptor activity; Molecular Function GO:0016020; membrane; Cellular Component	NA	Galectin-3-binding protein B	Uncharacterized protein (Fragment)
chr1	Lcro_GLEAN_10015258	2141211	2150718	0.872229	-	IPR003961; Fibronectin, type III IPR007110; Immunoglobulin-like IPR010457; Immunoglobulin C2-set-like, ligand-binding IPR015152; Growth hormone/erythropoietin receptor, ligand binding	GO:0005515; protein binding; Molecular Function	NA	Cytokine receptor-like factor 1	Cytokine receptor-like factor 1.a
chr1	Lcro_GLEAN_10015272	2484694	2486526	0.999843	+	IPR000372; Leucine-rich repeat-containing N-terminal IPR001611; Leucine-rich repeat IPR003591; Leucine-rich repeat, typical subtype IPR003598; Immunoglobulin subtype 2 IPR003599; Immunoglobulin subtype IPR007110; Immunoglobulin-like IPR013098; Immunoglobulin I-set	GO:0005515; protein binding; Molecular Function	NA	Leucine-rich repeat and immunoglobulin-like domain-containing nogo receptor-interacting protein 3	Chromosome undetermined SCAF10544, whole genome shotgun sequence
chr1	Lcro_GLEAN_10015273	2495550	2496299	0.99963	-	IPR004827; Basic-leucine zipper (bZIP) transcription factor IPR011700; Basic leucine zipper	GO:0003700; sequence-specific DNA binding transcription factor activity; Molecular Function GO:0006355; regulation of transcription, DNA-dependent; Biological Process GO:0043565; sequence-specific DNA binding; Molecular Function GO:0046983; protein dimerization activity; Molecular Function	NA	Nuclear factor interleukin-3-regulated protein	E4 binding protein 4-4
chr1	Lcro_GLEAN_10015274	2502911	2504005	1	-	IPR004827; Basic-leucine zipper (bZIP) transcription factor IPR011700; Basic leucine zipper	GO:0003700; sequence-specific DNA binding transcription factor activity; Molecular Function GO:0006355; regulation of transcription, DNA-dependent; Biological Process GO:0043565; sequence-specific DNA binding; Molecular Function GO:0046983; protein dimerization activity; Molecular Function	NA	Nuclear factor interleukin-3-regulated protein	Si:dkey-172o19.2
chr1	Lcro_GLEAN_10000279	4238074	4241076	0.999999	-	IPR000038; Cell division/GTP binding protein IPR006571; TLDc	GO:0005525; GTP binding; Molecular Function GO:0007049; cell cycle; Biological Process	NA	Interferon-induced protein 44-like	Uncharacterized protein (Fragment)
chr1	Lcro_GLEAN_10013218	4608003	4615542	0.277789	-	IPR001611; Leucine-rich repeat IPR001870; B302/SPRY domain IPR003877; SPla/RYanodine receptor SPRY IPR003879; Butyrophylin-like IPR004020; Pyrin IPR006574; SPRY-associated IPR007111; NACHT nucleoside triphosphatase IPR018355; SPla/RYanodine receptor subgroup	GO:0005515; protein binding; Molecular Function	NA	Protein NLRC3	Si:ch211-209n20.3
chr1	Lcro_GLEAN_10013223	4738030	4744187	0.905693	-	IPR001611; Leucine-rich repeat IPR003590; Leucine-rich repeat, ribonuclease inhibitor subtype IPR003879; Butyrophylin-like IPR006553; Leucine-rich repeat, cysteine-containing subtype IPR006574; SPRY-associated	GO:0005515; protein binding; Molecular Function	NA	NACHT, LRR and PYD domains-containing protein 12	Si:ch211-171l17.4 (Fragment)
chr1	Lcro_GLEAN_10013225	4755288	4762190	0.99894	-	IPR001611; Leucine-rich repeat IPR001870; B302/SPRY domain IPR003590; Leucine-rich repeat, ribonuclease inhibitor subtype IPR003877; SPla/RYanodine receptor SPRY IPR003879; Butyrophylin-like IPR006553; Leucine-rich repeat, cysteine-containing subtype IPR006574; SPRY-associated IPR007111; NACHT nucleoside triphosphatase IPR018355; SPla/RYanodine receptor subgroup	GO:0005515; protein binding; Molecular Function	NA	NACHT, LRR and PYD domains-containing protein 3	Si:dkey-41c6.3
chr1	Lcro_GLEAN_10013228	4843712	4857533	1	-	IPR000233; Cadherin, cytoplasmic domain IPR002126; Cadherin IPR009122; Desmosomal cadherin	GO:0005509; calcium ion binding; Molecular Function GO:0007156; homophilic cell adhesion; Biological Process GO:0016020; membrane; Cellular Component	K07597 DSG2; desmoglein 2 K07597 Human Diseases; Cardiovascular Diseases; Arrhythmogenic right ventricular cardiomyopathy (ARVC) [PATH:ko05412]	Desmoglein-2	Desmocollin a
chr1	Lcro_GLEAN_10013232	5098109	5181050	0.445173	+	IPR000233; Cadherin, cytoplasmic domain IPR002126; Cadherin IPR014868; Cadherin prodomain-like	GO:0005509; calcium ion binding; Molecular Function GO:0007155; cell adhesion; Biological Process GO:0007156; homophilic cell adhesion; Biological Process GO:0016020; membrane; Cellular Component GO:0016021; integral to membrane; Cellular Component	NA	Cadherin-2	Uncharacterized protein (Fragment)
chr1	Lcro_GLEAN_10014537	5650126	5651307	1	-	IPR001766; Transcription factor, fork head	GO:0003700; sequence-specific DNA binding transcription factor activity; Molecular Function GO:0006355; regulation of transcription, DNA-dependent; Biological Process GO:0043565; sequence-specific DNA binding; Molecular Function	K09397	Forkhead box protein D3-A	Forkhead box D3
chr1	Lcro_GLEAN_10014539	5786775	5828502	0.998351	+	IPR010703; Dedicator of cytokinesis IPR021816; Protein of unknown function DUF3398	GO:0005085; guanyl-nucleotide exchange factor activity; Molecular Function GO:0005525; GTP binding; Molecular Function GO:0051020; GTPase binding; Molecular Function	NA	Dedicator of cytokinesis protein 7	Uncharacterized protein
chr1	Lcro_GLEAN_10021835	6488749	6492401	0.995665	+	IPR003928; Claudin-18 IPR004031; PMP-22/EMP/MP20/Claudin IPR006187; Claudin	GO:0005198; structural molecule activity; Molecular Function GO:0005923; tight junction; Cellular Component GO:0016020; membrane; Cellular Component	K06087 CLDN; claudin K06087 Environmental Information Processing; Signaling Molecules and Interaction; Cell adhesion molecules (CAMs) [PATH:ko04514] Cellular Processes; Cell Communication; Tight junction [PATH:ko04530] Organismal Systems; Immune System; Leukocyte transendothelial migration [PATH:ko04670] Human Diseases; Infectious Diseases; Hepatitis C [PATH:ko05160]	Claudin-18	Uncharacterized protein
chr1	Lcro_GLEAN_10021867	7464557	7511919	0.746675	+	IPR000233; Cadherin, cytoplasmic domain IPR002126; Cadherin	GO:0005509; calcium ion binding; Molecular Function GO:0007156; homophilic cell adhesion; Biological Process GO:0016020; membrane; Cellular Component	K06798	Cadherin-6	Uncharacterized protein
chr1	Lcro_GLEAN_10021873	7612531	7639535	0.405006	+	IPR000884; Thrombospondin, type 1 repeat IPR002861; Reeler domain IPR010294; ADAM-TS Spacer 1 IPR013273; Peptidase M12B, ADAM-TS	GO:0004222; metalloendopeptidase activity; Molecular Function GO:0005578; proteinaceous extracellular matrix; Cellular Component GO:0008237; metallopeptidase activity; Molecular Function GO:0008270; zinc ion binding; Molecular Function GO:0031012; extracellular matrix; Cellular Component	NA	ADAMTS-like protein 2	Uncharacterized protein (Fragment)
chr1	Lcro_GLEAN_10025205	9759256	9760583	0.618151	-	IPR001134; Netrin domain IPR015526; Frizzled-related IPR020067; Frizzled domain	GO:0005515; protein binding; Molecular Function	NA	Secreted frizzled-related protein 5	Uncharacterized protein (Fragment)
chr1	Lcro_GLEAN_10025213	9901722	9910021	0.444074	-	IPR003590; Leucine-rich repeat, ribonuclease inhibitor subtype IPR007111; NACHT nucleoside triphosphatase	NA	NA	NACHT, LRR and PYD domains-containing protein 12	Uncharacterized protein
chr1	Lcro_GLEAN_10025215	9950132	9951907	0.957842	+	NA	NA	NA	Tumor protein p53-inducible nuclear protein 1	Tumor protein p53-inducible nuclear protein 2
chr1	Lcro_GLEAN_10025239	10895989	10940938	0.305889	-	IPR001370; Baculoviral inhibition of apoptosis protein repeat IPR001841; Zinc finger, RING-type	GO:0005515; protein binding; Molecular Function GO:0005622; intracellular; Cellular Component GO:0008270; zinc ion binding; Molecular Function	NA	Baculoviral IAP repeat-containing protein 7-A	Chromosome undetermined SCAF8908, whole genome shotgun sequence. (Fragment)
chr1	Lcro_GLEAN_10015616	11937604	11939802	1	+	IPR004031; PMP-22/EMP/MP20/Claudin IPR006187; Claudin	GO:0005198; structural molecule activity; Molecular Function GO:0005923; tight junction; Cellular Component GO:0016020; membrane; Cellular Component	NA	Claudin-19	Uncharacterized protein
chr1	Lcro_GLEAN_10015622	12032116	12037657	1	-	IPR001876; Zinc finger, RanBP2-type IPR003892; Ubiquitin system component Cue	GO:0005515; protein binding; Molecular Function GO:0005622; intracellular; Cellular Component GO:0008270; zinc ion binding; Molecular Function	K12793 MAP3K7IP3, TAB3; TAK1-binding protein 3 K12793 Organismal Systems; Immune System; NOD-like receptor signaling pathway [PATH:ko04621]	TGF-beta-activated kinase 1 and MAP3K7-binding protein 3	Chromosome 1 SCAF14995, whole genome shotgun sequence
chr1	Lcro_GLEAN_10002569	12347926	12370311	0.999495	-	IPR003439; ABC transporter-like IPR003593; ATPase, AAA+ type, core	GO:0000166; nucleotide binding; Molecular Function GO:0005524; ATP binding; Molecular Function GO:0016887; ATPase activity; Molecular Function GO:0017111; nucleoside-triphosphatase activity; Molecular Function	NA	ATP-binding cassette sub-family A member 1	Uncharacterized protein
chr1	Lcro_GLEAN_10012848	12514164	12569640	0.933556	+	IPR001356; Homeobox IPR005542; PBX	GO:0003700; sequence-specific DNA binding transcription factor activity; Molecular Function GO:0005634; nucleus; Cellular Component GO:0006355; regulation of transcription, DNA-dependent; Biological Process GO:0043565; sequence-specific DNA binding; Molecular Function	NA	Pre-B-cell leukemia transcription factor 1	Uncharacterized protein
chr1	Lcro_GLEAN_10012876	13245497	13253587	1	+	IPR000073; Alpha/beta hydrolase fold-1	NA	K13699	1-acylglycerol-3-phosphate O-acyltransferase ABHD5	Uncharacterized protein
chr1	Lcro_GLEAN_10017197	14062104	14071343	0.752178	-	IPR000719; Protein kinase, catalytic domain IPR002290; Serine/threonine-protein kinase domain IPR017442; Serine/threonine-protein kinase-like domain IPR020635; Tyrosine-protein kinase, catalytic domain	GO:0004672; protein kinase activity; Molecular Function GO:0004674; protein serine/threonine kinase activity; Molecular Function GO:0005524; ATP binding; Molecular Function GO:0006468; protein phosphorylation; Biological Process	NA	MAP kinase-interacting serine/threonine-protein kinase 1	Uncharacterized protein
chr1	Lcro_GLEAN_10017204	14261061	14298868	0.636611	-	IPR001060; Fps/Fes/Fer/CIP4 homology IPR018808; SAFF domain	NA	NA	FCH domain only protein 1	Uncharacterized protein (Fragment)
chr1	Lcro_GLEAN_10007209	15132962	15147101	0.465697	-	IPR000233; Cadherin, cytoplasmic domain IPR002126; Cadherin IPR009122; Desmosomal cadherin	GO:0005509; calcium ion binding; Molecular Function GO:0007156; homophilic cell adhesion; Biological Process GO:0016020; membrane; Cellular Component	NA	Desmoglein-2	Uncharacterized protein (Fragment)
chr1	Lcro_GLEAN_10007210	15166492	15179170	0.595738	-	IPR000233; Cadherin, cytoplasmic domain IPR002126; Cadherin IPR009122; Desmosomal cadherin	GO:0005509; calcium ion binding; Molecular Function GO:0007156; homophilic cell adhesion; Biological Process GO:0016020; membrane; Cellular Component	NA	Desmoglein-4	Si:ch73-74h11.1 (Fragment)
chr1	Lcro_GLEAN_10007211	15193987	15236506	0.195167	-	IPR000233; Cadherin, cytoplasmic domain IPR002126; Cadherin IPR009122; Desmosomal cadherin	GO:0005509; calcium ion binding; Molecular Function GO:0007156; homophilic cell adhesion; Biological Process GO:0016020; membrane; Cellular Component	NA	Desmoglein-2	Uncharacterized protein (Fragment)
chr1	Lcro_GLEAN_10006777	16693277	16733606	0.651031	+	IPR000233; Cadherin, cytoplasmic domain IPR002126; Cadherin IPR014868; Cadherin prodomain-like	GO:0005509; calcium ion binding; Molecular Function GO:0007155; cell adhesion; Biological Process GO:0007156; homophilic cell adhesion; Biological Process GO:0016020; membrane; Cellular Component GO:0016021; integral to membrane; Cellular Component	NA	Cadherin-2	Uncharacterized protein (Fragment)
chr1	Lcro_GLEAN_10006778	16852703	16866654	0.627779	+	IPR000425; Major intrinsic protein	GO:0005215; transporter activity; Molecular Function GO:0006810; transport; Biological Process GO:0016020; membrane; Cellular Component	NA	Aquaporin-4	Aquaporin 4
chr1	Lcro_GLEAN_10010449	17211024	17219950	0.999644	+	IPR000719; Protein kinase, catalytic domain IPR002290; Serine/threonine-protein kinase domain IPR017442; Serine/threonine-protein kinase-like domain IPR020635; Tyrosine-protein kinase, catalytic domain	GO:0004672; protein kinase activity; Molecular Function GO:0004674; protein serine/threonine kinase activity; Molecular Function GO:0005524; ATP binding; Molecular Function GO:0006468; protein phosphorylation; Biological Process	K04372 MKNK, MNK; MAP kinase interacting serine/threonine kinase [EC:2.7.11.1] [EC:2.7.11.1] Environmental Information Processing; Signal Transduction; Two-component system [BR:ko02022] Environmental Information Processing; Signal Transduction; MAPK signaling pathway [PATH:ko04010] Organismal Systems; Endocrine System; Insulin signaling pathway [PATH:ko04910]	MAP kinase-interacting serine/threonine-protein kinase 2	Uncharacterized protein
chr1	Lcro_GLEAN_10010472	17802874	17825794	0.934542	+	IPR006020; Phosphotyrosine interaction domain IPR022164; Kinesin-like	GO:0005515; protein binding; Molecular Function	NA	Rab GTPase-activating protein 1-like	Uncharacterized protein
chr1	Lcro_GLEAN_10010474	17856860	17899744	0.880574	+	IPR000195; Rab-GAP/TBC domain	GO:0005097; Rab GTPase activator activity; Molecular Function GO:0005622; intracellular; Cellular Component GO:0032313; regulation of Rab GTPase activity; Biological Process	NA	Rab GTPase-activating protein 1-like	Uncharacterized protein
chr1	Lcro_GLEAN_10010475	17904420	17918349	0.99977	+	NA	NA	NA	Rab GTPase-activating protein 1	Uncharacterized protein
chr1	Lcro_GLEAN_10010476	17918451	17922442	0.770013	-	IPR006571; TLDc	NA	NA	Interferon-induced protein 44	Uncharacterized protein (Fragment)
chr1	Lcro_GLEAN_10010477	17926675	17929779	0.999241	-	IPR006571; TLDc	NA	NA	Interferon-induced protein 44	Uncharacterized protein (Fragment)
chr1	Lcro_GLEAN_10010478	17930984	17931508	1	-	IPR006571; TLDc	NA	NA	Interferon-induced protein 44	Uncharacterized protein (Fragment)
chr1	Lcro_GLEAN_10010479	17933305	17935472	1	-	NA	NA	NA	Interferon-induced protein 44-like	Uncharacterized protein
chr1	Lcro_GLEAN_10010968	18035554	18041166	0.999261	+	IPR000276; GPCR, rhodopsin-like, 7TM IPR000482; 5-Hydroxytryptamine 2B receptor IPR002231; 5-Hydroxytryptamine receptor IPR017452; GPCR, rhodopsin-like superfamily	GO:0007186; G-protein coupled receptor protein signaling pathway; Biological Process GO:0016021; integral to membrane; Cellular Component	K04157 HTR2; 5-hydroxytryptamine receptor 2 K04157 Environmental Information Processing; Signal Transduction; Calcium signaling pathway [PATH:ko04020] Environmental Information Processing; Signaling Molecules and Interaction; G protein-coupled receptors [BR:ko04030] Environmental Information Processing; Signaling Molecules and Interaction; Enzyme-linked receptors [BR:ko01020] Environmental Inform…	5-hydroxytryptamine receptor 2B	Uncharacterized protein
chr1	Lcro_GLEAN_10010227	18914497	18915714	0.673114	+	IPR001766; Transcription factor, fork head	GO:0003700; sequence-specific DNA binding transcription factor activity; Molecular Function GO:0006355; regulation of transcription, DNA-dependent; Biological Process GO:0043565; sequence-specific DNA binding; Molecular Function	K09398	Forkhead box protein E4	Forkhead box E3
chr1	Lcro_GLEAN_10010228	18921700	18922785	0.998487	+	IPR001766; Transcription factor, fork head	GO:0003700; sequence-specific DNA binding transcription factor activity; Molecular Function GO:0006355; regulation of transcription, DNA-dependent; Biological Process GO:0043565; sequence-specific DNA binding; Molecular Function	K09397	Forkhead box protein D2	Uncharacterized protein
chr1	Lcro_GLEAN_10010235	19126645	19135993	1	+	IPR000436; Sushi/SCR/CCP IPR000742; Epidermal growth factor-like, type 3 IPR001304; C-type lectin IPR002396; Selectin superfamily IPR006209; EGF IPR006210; Epidermal growth factor-like	GO:0005488; binding; Molecular Function GO:0005515; protein binding; Molecular Function GO:0007155; cell adhesion; Biological Process GO:0016020; membrane; Cellular Component	K06496 SELP; selectin, platele K06496 Environmental Information Processing; Signaling Molecules and Interaction; Cell adhesion molecules (CAMs) [PATH:ko04514] Human Diseases; Infectious Diseases; Staphylococcus aureus infection [PATH:ko05150] Human Diseases; Infectious Diseases; Malaria [PATH:ko05144]	P-selectin	Selectin P (Fragment)
chr1	Lcro_GLEAN_10010241	19234849	19243947	0.99886	-	IPR000276; GPCR, rhodopsin-like, 7TM IPR000355; Chemokine receptor IPR002861; Reeler domain IPR017452; GPCR, rhodopsin-like superfamily	GO:0004950; chemokine receptor activity; Molecular Function GO:0007186; G-protein coupled receptor protein signaling pathway; Biological Process GO:0016021; integral to membrane; Cellular Component	K04193 XCR1; XC chemokine receptor 1 K04193 Environmental Information Processing; Signaling Molecules and Interaction; Cytokine-cytokine receptor interaction [PATH:ko04060] Organismal Systems; Immune System; Chemokine signaling pathway [PATH:ko04062]	Chemokine XC receptor 1	Uncharacterized protein (Fragment)
chr1	Lcro_GLEAN_10010249	19369070	19377553	0.99963	-	IPR000719; Protein kinase, catalytic domain IPR002290; Serine/threonine-protein kinase domain IPR005301; Mob1/phocein IPR017442; Serine/threonine-protein kinase-like domain IPR020635; Tyrosine-protein kinase, catalytic domain	GO:0004672; protein kinase activity; Molecular Function GO:0004674; protein serine/threonine kinase activity; Molecular Function GO:0005524; ATP binding; Molecular Function GO:0006468; protein phosphorylation; Biological Process	K04372 MKNK, MNK; MAP kinase interacting serine/threonine kinase [EC:2.7.11.1] [EC:2.7.11.1] Environmental Information Processing; Signal Transduction; Two-component system [BR:ko02022] Environmental Information Processing; Signal Transduction; MAPK signaling pathway [PATH:ko04010] Organismal Systems; Endocrine System; Insulin signaling pathway [PATH:ko04910]	MAP kinase-interacting serine/threonine-protein kinase 1	Uncharacterized protein
chr1	Lcro_GLEAN_10012749	19690474	19692348	0.999739	-	IPR001811; Chemokine interleukin-8-like domain	GO:0005576; extracellular region; Cellular Component GO:0006955; immune response; Biological Process GO:0008009; chemokine activity; Molecular Function	K13072 CCL25; C-C motif chemokine 25 K13072 Environmental Information Processing; Signaling Molecules and Interaction; Cytokine-cytokine receptor interaction [PATH:ko04060] Organismal Systems; Immune System; Intestinal immune network for IgA production [PATH:ko04672] Organismal Systems; Immune System; Chemokine signaling pathway [PATH:ko04062]	C-C motif chemokine 25	CC chemokine
chr1	Lcro_GLEAN_10012760	20153437	20207196	0.999419	-	IPR001012; UBX IPR006577; UAS IPR019955; Ubiquitin supergroup	GO:0005515; protein binding; Molecular Function	NA	FAS-associated factor 1	Uncharacterized protein (Fragment)
chr1	Lcro_GLEAN_10012764	20307719	20311411	0.99963	-	IPR001580; Calreticulin/calnexin	GO:0005509; calcium ion binding; Molecular Function	K08057 CALR; calreticulin K08057 Genetic Information Processing; Folding, Sorting and Degradation; Protein processing in endoplasmic reticulum [PATH:ko04141] Cellular Processes; Transport and Catabolism; Phagosome [PATH:ko04145] Organismal Systems; Immune System; Antigen processing and presentation [PATH:ko04612] Human Diseases; Infectious Diseases; HTLV-I infection [PATH:ko05166] Human Diseases;…	Calreticulin	Calreticulin,-like 2
chr1	Lcro_GLEAN_10009679	20916673	20918284	1	-	IPR007087; Zinc finger, C2H2-type IPR015880; Zinc finger, C2H2-like	GO:0005622; intracellular; Cellular Component GO:0008270; zinc ion binding; Molecular Function	K09204	Krueppel-like factor 2	Uncharacterized protein
chr1	Lcro_GLEAN_10009685	21107635	21111397	0.999562	+	IPR000010; Proteinase inhibitor I25, cystatin	GO:0004869; cysteine-type endopeptidase inhibitor activity; Molecular Function	NA	Alpha-2-HS-glycoprotein	Uncharacterized protein
chr1	Lcro_GLEAN_10009695	21216447	21220923	1	-	IPR001580; Calreticulin/calnexin	GO:0005509; calcium ion binding; Molecular Function	K08057 CALR; calreticulin K08057 Genetic Information Processing; Folding, Sorting and Degradation; Protein processing in endoplasmic reticulum [PATH:ko04141] Cellular Processes; Transport and Catabolism; Phagosome [PATH:ko04145] Organismal Systems; Immune System; Antigen processing and presentation [PATH:ko04612] Human Diseases; Infectious Diseases; HTLV-I infection [PATH:ko05166] Human Diseases;…	Calreticulin	Uncharacterized protein
chr2	Lcro_GLEAN_10007460	145645	147015	0.999015	-	IPR006052; Tumour necrosis factor IPR008064; Fas ligand	GO:0005164; tumor necrosis factor receptor binding; Molecular Function GO:0005576; extracellular region; Cellular Component GO:0006915; apoptosis; Biological Process GO:0006955; immune response; Biological Process GO:0007165; signal transduction; Biological Process GO:0016020; membrane; Cellular Component	K04389 TNFSF6, FASL; tumor necrosis factor ligand superfamily member 6 K04389 Environmental Information Processing; Signal Transduction; Two-component system [BR:ko02022] Environmental Information Processing; Signal Transduction; MAPK signaling pathway [PATH:ko04010] Environmental Information Processing; Signaling Molecules and Interaction; Cytokine-cytokine receptor interaction [PATH:ko04060] Ce…	Tumor necrosis factor ligand superfamily member 6	Uncharacterized protein
chr2	Lcro_GLEAN_10007464	240759	246798	1	-	IPR000866; Alkyl hydroperoxide reductase subunit C/ Thiol specific antioxidant IPR017936; Thioredoxin-like IPR019479; Peroxiredoxin, C-terminal	GO:0016209; antioxidant activity; Molecular Function GO:0016491; oxidoreductase activity; Molecular Function GO:0045454; cell redox homeostasis; Biological Process GO:0051920; peroxiredoxin activity; Molecular Function	K11188 PRDX6; peroxiredoxin 6, 1-Cys peroxiredoxin [EC:1.11.1.7 1.11.1.15 3.1.1.-] [EC:1.11.1.7 1.11.1.15 3.1.1.-] Metabolism; Energy Metabolism; Methane metabolism [PATH:ko00680] Metabolism; Amino Acid Metabolism; Phenylalanine metabolism [PATH:ko00360] Metabolism; Biosynthesis of Other Secondary Metabolites; Phenylpropanoid biosynthesis [PATH:ko00940]	Peroxiredoxin-6	Peroxiredoxin 6
chr2	Lcro_GLEAN_10007467	272984	281399	0.999943	-	IPR004087; K Homology IPR004088; K Homology, type 1 IPR018111; K Homology, type 1, subgroup	GO:0003723; RNA binding; Molecular Function	NA	Vigilin	Uncharacterized protein
chr2	Lcro_GLEAN_10011468	940420	960823	0.999891	-	IPR022158; Inositol phosphatase	NA	NA	Tumor protein p63-regulated gene 1-like protein	Uncharacterized protein
chr2	Lcro_GLEAN_10011471	1154228	1159527	1	+	IPR000210; BTB/POZ-like IPR007087; Zinc finger, C2H2-type IPR013069; BTB/POZ IPR015880; Zinc finger, C2H2-like	GO:0005515; protein binding; Molecular Function GO:0005622; intracellular; Cellular Component GO:0008270; zinc ion binding; Molecular Function	K15618 BCL6; B-cell lymphoma 6 protein K15618 Human Diseases; Cancers; Transcriptional misregulation in cancers [PATH:ko05202]	B-cell lymphoma 6 protein homolog	Uncharacterized protein
chr2	Lcro_GLEAN_10011476	1234054	1239055	0.999051	-	IPR009114; Angiomotin	NA	NA	Angiomotin-like protein 2	Uncharacterized protein
chr2	Lcro_GLEAN_10016596	2011309	2014952	0.727348	-	IPR001073; Complement C1q protein IPR008160; Collagen triple helix repeat	NA	NA	Complement C1q tumor necrosis factor-related protein 7	Uncharacterized protein (Fragment)
chr2	Lcro_GLEAN_10016604	2221401	2236971	0.727307	+	IPR000233; Cadherin, cytoplasmic domain IPR002126; Cadherin	GO:0005509; calcium ion binding; Molecular Function GO:0007156; homophilic cell adhesion; Biological Process GO:0016020; membrane; Cellular Component	NA	Cadherin-24	Uncharacterized protein (Fragment)
chr2	Lcro_GLEAN_10016608	2297574	2308057	0.9988	+	IPR001315; Caspase Recruitment IPR001478; PDZ/DHR/GF	GO:0005515; protein binding; Molecular Function GO:0005622; intracellular; Cellular Component GO:0042981; regulation of apoptosis; Biological Process	NA	Caspase recruitment domain-containing protein 10	Uncharacterized protein (Fragment)
chr2	Lcro_GLEAN_10012156	3652948	3654843	1	+	NA	NA	NA	Death-associated protein-like 1-A	Death-associated protein-like 1-A
chr2	Lcro_GLEAN_10019716	4581483	4595407	0.725683	+	IPR001452; Src homology-3 domain IPR002014; VHS IPR003903; Ubiquitin interacting motif IPR018205; VHS subgroup	GO:0005515; protein binding; Molecular Function GO:0006886; intracellular protein transport; Biological Process	K04705 STAM; signal transducing adaptor molecule K04705 Environmental Information Processing; Signal Transduction; Jak-STAT signaling pathway [PATH:ko04630] Cellular Processes; Transport and Catabolism; Endocytosis [PATH:ko04144]	Signal transducing adapter molecule 2	Uncharacterized protein
chr2	Lcro_GLEAN_10019724	4921779	4927231	0.889564	+	IPR003599; Immunoglobulin subtype IPR004074; Interleukin-1 receptor, type I/II IPR007110; Immunoglobulin-like IPR015621; Interleukin-1 receptor	GO:0004908; interleukin-1 receptor activity; Molecular Function GO:0005515; protein binding; Molecular Function	K04387 IL1R2; interleukin 1 receptor type II K04387 Environmental Information Processing; Signal Transduction; Two-component system [BR:ko02022] Environmental Information Processing; Signal Transduction; MAPK signaling pathway [PATH:ko04010] Environmental Information Processing; Signaling Molecules and Interaction; Cytokine-cytokine receptor interaction [PATH:ko04060] Organismal Systems; Immune S…	Interleukin-1 receptor type 2	Type II IL-1 receptor
chr2	Lcro_GLEAN_10019726	4940597	4953923	0.771273	+	IPR001611; Leucine-rich repeat IPR001841; Zinc finger, RING-type IPR003590; Leucine-rich repeat, ribonuclease inhibitor subtype IPR003597; Immunoglobulin C1-set IPR007110; Immunoglobulin-like	GO:0005515; protein binding; Molecular Function GO:0008270; zinc ion binding; Molecular Function	NA	NACHT, LRR and PYD domains-containing protein 12	Uncharacterized protein
chr2	Lcro_GLEAN_10019736	5170761	5171501	1	+	IPR004031; PMP-22/EMP/MP20/Claudin IPR006187; Claudin	GO:0005198; structural molecule activity; Molecular Function GO:0005923; tight junction; Cellular Component GO:0016020; membrane; Cellular Component	NA	Claudin-1	Claudin 14b
chr2	Lcro_GLEAN_10019737	5176436	5177095	1	-	IPR004031; PMP-22/EMP/MP20/Claudin IPR006187; Claudin	GO:0005198; structural molecule activity; Molecular Function GO:0005923; tight junction; Cellular Component GO:0016020; membrane; Cellular Component	NA	Claudin-22	Claudin 33b
chr2	Lcro_GLEAN_10006595	5910638	5913322	0.535418	-	IPR001101; Plectin repeat	GO:0005856; cytoskeleton; Cellular Component	NA	Plectin	Uncharacterized protein (Fragment)
chr2	Lcro_GLEAN_10006596	5913496	5939062	0.163015	-	IPR001101; Plectin repeat IPR018159; Spectrin/alpha-actinin	GO:0005856; cytoskeleton; Cellular Component	NA	Desmoplakin	Chromosome undetermined SCAF14724, whole genome shotgun sequence. (Fragment)
chr2	Lcro_GLEAN_10006601	5994715	6000854	0.99963	+	IPR001346; Interferon regulatory factor IPR019471; Interferon regulatory factor-3	GO:0003700; sequence-specific DNA binding transcription factor activity; Molecular Function GO:0005634; nucleus; Cellular Component GO:0006355; regulation of transcription, DNA-dependent; Biological Process	K09445	Interferon regulatory factor 4	Uncharacterized protein (Fragment)
chr2	Lcro_GLEAN_10006700	6658985	6660403	0.999015	-	IPR001766; Transcription factor, fork head	GO:0003700; sequence-specific DNA binding transcription factor activity; Molecular Function GO:0006355; regulation of transcription, DNA-dependent; Biological Process GO:0043565; sequence-specific DNA binding; Molecular Function	K09396	Forkhead box protein C1	Forkhead box C1a
chr2	Lcro_GLEAN_10006701	6672109	6674986	0.999015	-	IPR001766; Transcription factor, fork head	GO:0003700; sequence-specific DNA binding transcription factor activity; Molecular Function GO:0006355; regulation of transcription, DNA-dependent; Biological Process GO:0043565; sequence-specific DNA binding; Molecular Function	K09399	Forkhead box protein F2	Uncharacterized protein
chr2	Lcro_GLEAN_10006702	6680564	6681391	0.494972	-	IPR001766; Transcription factor, fork head	GO:0003700; sequence-specific DNA binding transcription factor activity; Molecular Function GO:0006355; regulation of transcription, DNA-dependent; Biological Process GO:0043565; sequence-specific DNA binding; Molecular Function	K09410	Forkhead box protein Q1	Uncharacterized protein
chr2	Lcro_GLEAN_10006705	6800910	6807042	1	-	IPR001346; Interferon regulatory factor IPR019471; Interferon regulatory factor-3	GO:0003700; sequence-specific DNA binding transcription factor activity; Molecular Function GO:0005634; nucleus; Cellular Component GO:0006355; regulation of transcription, DNA-dependent; Biological Process	K09445	Interferon regulatory factor 4	Uncharacterized protein (Fragment)
chr2	Lcro_GLEAN_10011872	6889762	6908765	1	-	IPR000375; Dynamin central domain IPR001401; Dynamin, GTPase domain IPR001849; Pleckstrin homology domain IPR003130; Dynamin GTPase effector IPR020850; GTPase effector domain, GED IPR022812; Dynamin	GO:0003924; GTPase activity; Molecular Function GO:0005515; protein binding; Molecular Function GO:0005525; GTP binding; Molecular Function	NA	Dynamin-3	Uncharacterized protein
chr2	Lcro_GLEAN_10011874	6910143	6916304	0.999178	-	IPR013216; Methyltransferase type 11	GO:0008152; metabolic process; Biological Process GO:0008168; methyltransferase activity; Molecular Function	NA	Methyltransferase-like protein 13	Uncharacterized protein
chr2	Lcro_GLEAN_10011877	6931298	6933965	1	-	NA	NA	NA	Methyltransferase-like protein 13	Uncharacterized protein
chr2	Lcro_GLEAN_10011891	7157051	7169420	0.751376	-	IPR010591; ATP11	GO:0005739; mitochondrion; Cellular Component GO:0006461; protein complex assembly; Biological Process	K07555	ATP synthase mitochondrial F1 complex assembly factor 1	Uncharacterized protein
chr2	Lcro_GLEAN_10011900	7646121	7662006	0.496521	-	IPR001368; TNFR/CD27/30/40/95 cysteine-rich region IPR008063; Fas receptor	GO:0004872; receptor activity; Molecular Function GO:0004888; transmembrane receptor activity; Molecular Function GO:0006915; apoptosis; Biological Process GO:0006955; immune response; Biological Process GO:0007165; signal transduction; Biological Process GO:0016020; membrane; Cellular Component	NA	Tumor necrosis factor receptor superfamily member 14	Uncharacterized protein
chr2	Lcro_GLEAN_10013928	8165646	8178023	0.495612	-	IPR001791; Laminin G domain IPR002049; EGF-like, laminin IPR009254; Laminin I IPR010307; Laminin II IPR012680; Laminin G, subdomain 2	GO:0005102; receptor binding; Molecular Function GO:0005604; basement membrane; Cellular Component GO:0005606; laminin-1 complex; Cellular Component GO:0007155; cell adhesion; Biological Process GO:0030155; regulation of cell adhesion; Biological Process GO:0030334; regulation of cell migration; Biological Process GO:0045995; regulation of embryonic development; Biological Process	NA	Laminin subunit alpha-3	Uncharacterized protein (Fragment)
chr2	Lcro_GLEAN_10013929	8180466	8183584	0.993888	-	IPR000668; Peptidase C1A, papain C-terminal IPR013128; Peptidase C1A, papain IPR013201; Proteinase inhibitor I29, cathepsin propeptide	GO:0006508; proteolysis; Biological Process GO:0008234; cysteine-type peptidase activity; Molecular Function	NA	Cathepsin L	Uncharacterized protein (Fragment)
chr2	Lcro_GLEAN_10004829	8729753	8744830	0.964847	-	IPR001060; Fps/Fes/Fer/CIP4 homology IPR001452; Src homology-3 domain	GO:0005515; protein binding; Molecular Function	NA	Formin-binding protein 1-like	Uncharacterized protein
chr2	Lcro_GLEAN_10004835	8816554	8817020	0.922846	-	IPR000436; Sushi/SCR/CCP IPR015104; Beta-2-glycoprotein-1 fifth domain	NA	NA	Complement factor H-related protein 1	Complement regulatory plasma protein
chr2	Lcro_GLEAN_10004836	8821884	8825914	0.922846	-	IPR000436; Sushi/SCR/CCP	NA	NA	Complement factor H	Uncharacterized protein
chr2	Lcro_GLEAN_10004837	8827693	8842814	0.622928	-	IPR000436; Sushi/SCR/CCP	NA	K04004 HF1; complement factor H K04004 Organismal Systems; Immune System; Complement and coagulation cascades [PATH:ko04610] Human Diseases; Infectious Diseases; Staphylococcus aureus infection [PATH:ko05150]	Complement factor H	Complement regulatory plasma protein
chr2	Lcro_GLEAN_10004838	8845745	8848748	0.999999	-	IPR000436; Sushi/SCR/CCP	NA	NA	Complement factor H-related protein 3	SBCFR-1 protein (Fragment)
chr2	Lcro_GLEAN_10004839	8851318	8858261	0.626444	-	IPR000436; Sushi/SCR/CCP	NA	NA	Complement factor H	SBCFR-1 protein (Fragment)
chr2	Lcro_GLEAN_10006510	9168074	9173894	1	+	IPR000010; Proteinase inhibitor I25, cystatin	GO:0004869; cysteine-type endopeptidase inhibitor activity; Molecular Function	NA	Alpha-2-HS-glycoprotein (Fragment)	Uncharacterized protein
chr2	Lcro_GLEAN_10013059	9906729	9907991	1	-	IPR013026; Tetratricopeptide repeat-containing	GO:0005515; protein binding; Molecular Function	NA	Interferon-induced protein with tetratricopeptide repeats 5	Uncharacterized protein (Fragment)
chr2	Lcro_GLEAN_10013070	10133903	10134127	0.999982	+	IPR007918; Mitochondrial distribution/morphology family 35/apoptosis	NA	NA	TP53-regulated inhibitor of apoptosis 1-B	Uncharacterized protein
chr2	Lcro_GLEAN_10013106	10572958	10573961	0.5	-	IPR004031; PMP-22/EMP/MP20/Claudin IPR006187; Claudin	GO:0005198; structural molecule activity; Molecular Function GO:0005923; tight junction; Cellular Component GO:0016020; membrane; Cellular Component	K06087 CLDN; claudin K06087 Environmental Information Processing; Signaling Molecules and Interaction; Cell adhesion molecules (CAMs) [PATH:ko04514] Cellular Processes; Cell Communication; Tight junction [PATH:ko04530] Organismal Systems; Immune System; Leukocyte transendothelial migration [PATH:ko04670] Human Diseases; Infectious Diseases; Hepatitis C [PATH:ko05160]	Claudin-19	Uncharacterized protein (Fragment)
chr2	Lcro_GLEAN_10013111	10634415	10640119	0.989322	+	IPR000157; Toll-Interleukin receptor IPR003599; Immunoglobulin subtype IPR007110; Immunoglobulin-like IPR015621; Interleukin-1 receptor	GO:0004888; transmembrane receptor activity; Molecular Function GO:0005515; protein binding; Molecular Function GO:0007165; signal transduction; Biological Process GO:0031224; intrinsic to membrane; Cellular Component GO:0045087; innate immune response; Biological Process	K04723 IL1RAP; interleukin 1 receptor accessory protein K04723 Environmental Information Processing; Signaling Molecules and Interaction; Cytokine-cytokine receptor interaction [PATH:ko04060] Cellular Processes; Cell Growth and Death; Apoptosis [PATH:ko04210]	Interleukin-1 receptor accessory protein	Uncharacterized protein (Fragment)
chr2	Lcro_GLEAN_10013112	10646773	10647540	0.670393	+	IPR000157; Toll-Interleukin receptor IPR015621; Interleukin-1 receptor	GO:0004888; transmembrane receptor activity; Molecular Function GO:0007165; signal transduction; Biological Process GO:0031224; intrinsic to membrane; Cellular Component GO:0045087; innate immune response; Biological Process	NA	Interleukin-1 receptor accessory protein	Uncharacterized protein (Fragment)
chr3	Lcro_GLEAN_10024419	5382	6047	1	-	IPR004031; PMP-22/EMP/MP20/Claudin IPR006187; Claudin	GO:0005198; structural molecule activity; Molecular Function GO:0005923; tight junction; Cellular Component GO:0016020; membrane; Cellular Component	NA	Claudin-3	Uncharacterized protein
chr3	Lcro_GLEAN_10024420	6967	7602	0.994931	-	IPR004031; PMP-22/EMP/MP20/Claudin IPR006187; Claudin	GO:0005198; structural molecule activity; Molecular Function GO:0005923; tight junction; Cellular Component GO:0016020; membrane; Cellular Component	K06087 CLDN; claudin K06087 Environmental Information Processing; Signaling Molecules and Interaction; Cell adhesion molecules (CAMs) [PATH:ko04514] Cellular Processes; Cell Communication; Tight junction [PATH:ko04530] Organismal Systems; Immune System; Leukocyte transendothelial migration [PATH:ko04670] Human Diseases; Infectious Diseases; Hepatitis C [PATH:ko05160]	Claudin-4	Claudin 6
chr3	Lcro_GLEAN_10024421	9158	9823	0.999242	-	IPR004031; PMP-22/EMP/MP20/Claudin IPR006187; Claudin	GO:0005198; structural molecule activity; Molecular Function GO:0005923; tight junction; Cellular Component GO:0016020; membrane; Cellular Component	NA	Claudin-4	Claudin 30b
chr3	Lcro_GLEAN_10024422	11803	12474	1	-	IPR004031; PMP-22/EMP/MP20/Claudin IPR006187; Claudin	GO:0005198; structural molecule activity; Molecular Function GO:0005923; tight junction; Cellular Component GO:0016020; membrane; Cellular Component	NA	Claudin-4	Uncharacterized protein
chr3	Lcro_GLEAN_10024423	13878	14501	1	-	IPR004031; PMP-22/EMP/MP20/Claudin IPR006187; Claudin	GO:0005198; structural molecule activity; Molecular Function GO:0005923; tight junction; Cellular Component GO:0016020; membrane; Cellular Component	NA	Claudin-4	Claudin 30
chr3	Lcro_GLEAN_10024424	15195	15809	1	-	IPR004031; PMP-22/EMP/MP20/Claudin IPR006187; Claudin	GO:0005198; structural molecule activity; Molecular Function GO:0005923; tight junction; Cellular Component GO:0016020; membrane; Cellular Component	NA	Claudin-4	Uncharacterized protein
chr3	Lcro_GLEAN_10024425	17836	18468	0.999242	-	IPR003556; Claudin-14 IPR004031; PMP-22/EMP/MP20/Claudin IPR006187; Claudin	GO:0005198; structural molecule activity; Molecular Function GO:0005923; tight junction; Cellular Component GO:0016020; membrane; Cellular Component	K06087 CLDN; claudin K06087 Environmental Information Processing; Signaling Molecules and Interaction; Cell adhesion molecules (CAMs) [PATH:ko04514] Cellular Processes; Cell Communication; Tight junction [PATH:ko04530] Organismal Systems; Immune System; Leukocyte transendothelial migration [PATH:ko04670] Human Diseases; Infectious Diseases; Hepatitis C [PATH:ko05160]	Claudin-4	Uncharacterized protein
chr3	Lcro_GLEAN_10024426	19619	20368	1	-	IPR004031; PMP-22/EMP/MP20/Claudin IPR006187; Claudin	GO:0005198; structural molecule activity; Molecular Function GO:0005923; tight junction; Cellular Component GO:0016020; membrane; Cellular Component	K06087 CLDN; claudin K06087 Environmental Information Processing; Signaling Molecules and Interaction; Cell adhesion molecules (CAMs) [PATH:ko04514] Cellular Processes; Cell Communication; Tight junction [PATH:ko04530] Organismal Systems; Immune System; Leukocyte transendothelial migration [PATH:ko04670] Human Diseases; Infectious Diseases; Hepatitis C [PATH:ko05160]	Claudin-4	Uncharacterized protein
chr3	Lcro_GLEAN_10024427	22383	23018	0.999242	-	IPR004031; PMP-22/EMP/MP20/Claudin IPR006187; Claudin	GO:0005198; structural molecule activity; Molecular Function GO:0005923; tight junction; Cellular Component GO:0016020; membrane; Cellular Component	NA	Claudin-4	Claudin 27a
chr3	Lcro_GLEAN_10024429	32730	33398	0.999429	+	IPR004031; PMP-22/EMP/MP20/Claudin IPR006187; Claudin	GO:0005198; structural molecule activity; Molecular Function GO:0005923; tight junction; Cellular Component GO:0016020; membrane; Cellular Component	NA	Claudin-4	Uncharacterized protein
chr3	Lcro_GLEAN_10024430	36209	36865	0.998672	+	IPR004031; PMP-22/EMP/MP20/Claudin IPR006187; Claudin	GO:0005198; structural molecule activity; Molecular Function GO:0005923; tight junction; Cellular Component GO:0016020; membrane; Cellular Component	NA	Claudin-4	Claudin 3b (Fragment)
chr3	Lcro_GLEAN_10024431	38466	39113	0.999411	+	IPR003549; Claudin-3 IPR004031; PMP-22/EMP/MP20/Claudin IPR006187; Claudin	GO:0005198; structural molecule activity; Molecular Function GO:0005923; tight junction; Cellular Component GO:0016020; membrane; Cellular Component	K06087 CLDN; claudin K06087 Environmental Information Processing; Signaling Molecules and Interaction; Cell adhesion molecules (CAMs) [PATH:ko04514] Cellular Processes; Cell Communication; Tight junction [PATH:ko04530] Organismal Systems; Immune System; Leukocyte transendothelial migration [PATH:ko04670] Human Diseases; Infectious Diseases; Hepatitis C [PATH:ko05160]	Claudin-3	Claudin 3A
chr3	Lcro_GLEAN_10024435	86931	94537	0.643486	-	IPR001111; Transforming growth factor-beta, N-terminal IPR001839; Transforming growth factor-beta, C-terminal IPR003939; Transforming growth factor, beta 1 IPR015615; Transforming growth factor-beta-related IPR016319; Transforming growth factor-beta	GO:0005160; transforming growth factor beta receptor binding; Molecular Function GO:0005615; extracellular space; Cellular Component GO:0008083; growth factor activity; Molecular Function GO:0016049; cell growth; Biological Process GO:0040007; growth; Biological Process	K13375 TGFB1; transforming growth factor beta-1 K13375 Environmental Information Processing; Signal Transduction; Two-component system [BR:ko02022] Environmental Information Processing; Signal Transduction; MAPK signaling pathway [PATH:ko04010] Environmental Information Processing; Signal Transduction; TGF-beta signaling pathway [PATH:ko04350] Environmental Information Processing; Signaling Molec…	Transforming growth factor beta-1	TGF beta-1
chr3	Lcro_GLEAN_10024440	149546	156251	1	-	IPR001079; Galectin, carbohydrate recognition domain	GO:0005529; sugar binding; Molecular Function	NA	Galectin-4	Uncharacterized protein
chr3	Lcro_GLEAN_10024459	752160	804315	0.997386	-	IPR003598; Immunoglobulin subtype 2 IPR003599; Immunoglobulin subtype IPR003961; Fibronectin, type III IPR007110; Immunoglobulin-like IPR013098; Immunoglobulin I-set	GO:0005515; protein binding; Molecular Function	K06763	Contactin-5	Uncharacterized protein (Fragment)
chr3	Lcro_GLEAN_10024469	1290943	1292025	0.996082	+	IPR000276; GPCR, rhodopsin-like, 7TM IPR000355; Chemokine receptor IPR001277; CXC chemokine receptor, type 4 IPR017452; GPCR, rhodopsin-like superfamily	GO:0004950; chemokine receptor activity; Molecular Function GO:0007186; G-protein coupled receptor protein signaling pathway; Biological Process GO:0016021; integral to membrane; Cellular Component GO:0016494; C-X-C chemokine receptor activity; Molecular Function	K04190 CXCR5, BLR1; C-X-C chemokine receptor type 5 K04190 Environmental Information Processing; Signaling Molecules and Interaction; Cytokine-cytokine receptor interaction [PATH:ko04060] Organismal Systems; Immune System; Chemokine signaling pathway [PATH:ko04062]	C-X-C chemokine receptor type 5	Uncharacterized protein (Fragment)
chr3	Lcro_GLEAN_10024470	1292774	1300729	0.999242	-	IPR015668; B Cell Lymphoma 9	NA	NA	B-cell CLL/lymphoma 9-like protein	Uncharacterized protein
chr3	Lcro_GLEAN_10024475	1511572	1522321	1	+	IPR000082; SEA IPR000859; CUB IPR001254; Peptidase S1/S6, chymotrypsin/Hap IPR002172; Low-density lipoprotein (LDL) receptor class A repeat	GO:0004252; serine-type endopeptidase activity; Molecular Function GO:0005515; protein binding; Molecular Function GO:0006508; proteolysis; Biological Process	K08670	Suppressor of tumorigenicity 14 protein	Uncharacterized protein
chr3	Lcro_GLEAN_10024482	1554492	1558939	0.999616	-	IPR000261; EPS15 homology (EH) IPR001401; Dynamin, GTPase domain IPR018249; EF-HAND 2	GO:0003924; GTPase activity; Molecular Function GO:0005515; protein binding; Molecular Function GO:0005525; GTP binding; Molecular Function	K12469 EHD2; EH domain-containing protein 2 K12469 Cellular Processes; Transport and Catabolism; Endocytosis [PATH:ko04144]	EH domain-containing protein 2	Uncharacterized protein
chr3	Lcro_GLEAN_10014156	2767954	2768619	1	-	IPR004031; PMP-22/EMP/MP20/Claudin IPR006187; Claudin	GO:0005198; structural molecule activity; Molecular Function GO:0005923; tight junction; Cellular Component GO:0016020; membrane; Cellular Component	NA	Claudin-3	Uncharacterized protein
chr3	Lcro_GLEAN_10014157	2769539	2770174	0.994931	-	IPR004031; PMP-22/EMP/MP20/Claudin IPR006187; Claudin	GO:0005198; structural molecule activity; Molecular Function GO:0005923; tight junction; Cellular Component GO:0016020; membrane; Cellular Component	K06087 CLDN; claudin K06087 Environmental Information Processing; Signaling Molecules and Interaction; Cell adhesion molecules (CAMs) [PATH:ko04514] Cellular Processes; Cell Communication; Tight junction [PATH:ko04530] Organismal Systems; Immune System; Leukocyte transendothelial migration [PATH:ko04670] Human Diseases; Infectious Diseases; Hepatitis C [PATH:ko05160]	Claudin-4	Claudin 6
chr3	Lcro_GLEAN_10014158	2771730	2772395	0.999242	-	IPR004031; PMP-22/EMP/MP20/Claudin IPR006187; Claudin	GO:0005198; structural molecule activity; Molecular Function GO:0005923; tight junction; Cellular Component GO:0016020; membrane; Cellular Component	NA	Claudin-4	Claudin 30b
chr3	Lcro_GLEAN_10014159	2774379	2775050	1	-	IPR004031; PMP-22/EMP/MP20/Claudin IPR006187; Claudin	GO:0005198; structural molecule activity; Molecular Function GO:0005923; tight junction; Cellular Component GO:0016020; membrane; Cellular Component	NA	Claudin-4	Uncharacterized protein
chr3	Lcro_GLEAN_10014160	2777316	2777939	1	-	IPR004031; PMP-22/EMP/MP20/Claudin IPR006187; Claudin	GO:0005198; structural molecule activity; Molecular Function GO:0005923; tight junction; Cellular Component GO:0016020; membrane; Cellular Component	NA	Claudin-4	Claudin 30
chr3	Lcro_GLEAN_10014161	2778633	2779247	1	-	IPR004031; PMP-22/EMP/MP20/Claudin IPR006187; Claudin	GO:0005198; structural molecule activity; Molecular Function GO:0005923; tight junction; Cellular Component GO:0016020; membrane; Cellular Component	NA	Claudin-4	Claudin 28a
chr3	Lcro_GLEAN_10014162	2781280	2781906	0.999242	-	IPR003556; Claudin-14 IPR004031; PMP-22/EMP/MP20/Claudin IPR006187; Claudin	GO:0005198; structural molecule activity; Molecular Function GO:0005923; tight junction; Cellular Component GO:0016020; membrane; Cellular Component	K06087 CLDN; claudin K06087 Environmental Information Processing; Signaling Molecules and Interaction; Cell adhesion molecules (CAMs) [PATH:ko04514] Cellular Processes; Cell Communication; Tight junction [PATH:ko04530] Organismal Systems; Immune System; Leukocyte transendothelial migration [PATH:ko04670] Human Diseases; Infectious Diseases; Hepatitis C [PATH:ko05160]	Claudin-4	Uncharacterized protein
chr3	Lcro_GLEAN_10014163	2783057	2783806	1	-	IPR004031; PMP-22/EMP/MP20/Claudin IPR006187; Claudin	GO:0005198; structural molecule activity; Molecular Function GO:0005923; tight junction; Cellular Component GO:0016020; membrane; Cellular Component	K06087 CLDN; claudin K06087 Environmental Information Processing; Signaling Molecules and Interaction; Cell adhesion molecules (CAMs) [PATH:ko04514] Cellular Processes; Cell Communication; Tight junction [PATH:ko04530] Organismal Systems; Immune System; Leukocyte transendothelial migration [PATH:ko04670] Human Diseases; Infectious Diseases; Hepatitis C [PATH:ko05160]	Claudin-4	Uncharacterized protein
chr3	Lcro_GLEAN_10014164	2785821	2786456	0.999242	-	IPR004031; PMP-22/EMP/MP20/Claudin IPR006187; Claudin	GO:0005198; structural molecule activity; Molecular Function GO:0005923; tight junction; Cellular Component GO:0016020; membrane; Cellular Component	NA	Claudin-4	Claudin 27a
chr3	Lcro_GLEAN_10014165	2789542	2790165	1	-	IPR003549; Claudin-3 IPR004031; PMP-22/EMP/MP20/Claudin IPR006187; Claudin	GO:0005198; structural molecule activity; Molecular Function GO:0005923; tight junction; Cellular Component GO:0016020; membrane; Cellular Component	K06087 CLDN; claudin K06087 Environmental Information Processing; Signaling Molecules and Interaction; Cell adhesion molecules (CAMs) [PATH:ko04514] Cellular Processes; Cell Communication; Tight junction [PATH:ko04530] Organismal Systems; Immune System; Leukocyte transendothelial migration [PATH:ko04670] Human Diseases; Infectious Diseases; Hepatitis C [PATH:ko05160]	Claudin-4	Claudin 30
chr3	Lcro_GLEAN_10014166	2796128	2796796	0.999429	+	IPR004031; PMP-22/EMP/MP20/Claudin IPR006187; Claudin	GO:0005198; structural molecule activity; Molecular Function GO:0005923; tight junction; Cellular Component GO:0016020; membrane; Cellular Component	NA	Claudin-4	Uncharacterized protein
chr3	Lcro_GLEAN_10014167	2799607	2800263	0.998672	+	IPR004031; PMP-22/EMP/MP20/Claudin IPR006187; Claudin	GO:0005198; structural molecule activity; Molecular Function GO:0005923; tight junction; Cellular Component GO:0016020; membrane; Cellular Component	NA	Claudin-4	Claudin 3b (Fragment)
chr3	Lcro_GLEAN_10014168	2801864	2802511	0.999411	+	IPR003549; Claudin-3 IPR004031; PMP-22/EMP/MP20/Claudin IPR006187; Claudin	GO:0005198; structural molecule activity; Molecular Function GO:0005923; tight junction; Cellular Component GO:0016020; membrane; Cellular Component	K06087 CLDN; claudin K06087 Environmental Information Processing; Signaling Molecules and Interaction; Cell adhesion molecules (CAMs) [PATH:ko04514] Cellular Processes; Cell Communication; Tight junction [PATH:ko04530] Organismal Systems; Immune System; Leukocyte transendothelial migration [PATH:ko04670] Human Diseases; Infectious Diseases; Hepatitis C [PATH:ko05160]	Claudin-3	Claudin 3A
chr3	Lcro_GLEAN_10014172	2849800	2857406	0.643486	-	IPR001111; Transforming growth factor-beta, N-terminal IPR001839; Transforming growth factor-beta, C-terminal IPR003939; Transforming growth factor, beta 1 IPR015615; Transforming growth factor-beta-related IPR016319; Transforming growth factor-beta	GO:0005160; transforming growth factor beta receptor binding; Molecular Function GO:0005615; extracellular space; Cellular Component GO:0008083; growth factor activity; Molecular Function GO:0016049; cell growth; Biological Process GO:0040007; growth; Biological Process	K13375 TGFB1; transforming growth factor beta-1 K13375 Environmental Information Processing; Signal Transduction; Two-component system [BR:ko02022] Environmental Information Processing; Signal Transduction; MAPK signaling pathway [PATH:ko04010] Environmental Information Processing; Signal Transduction; TGF-beta signaling pathway [PATH:ko04350] Environmental Information Processing; Signaling Molec…	Transforming growth factor beta-1	TGF beta-1
chr3	Lcro_GLEAN_10009596	3694306	3724208	0.395711	+	IPR000719; Protein kinase, catalytic domain IPR001180; Citron-like IPR002290; Serine/threonine-protein kinase domain IPR017442; Serine/threonine-protein kinase-like domain IPR020635; Tyrosine-protein kinase, catalytic domain	GO:0004672; protein kinase activity; Molecular Function GO:0004674; protein serine/threonine kinase activity; Molecular Function GO:0005083; small GTPase regulator activity; Molecular Function GO:0005524; ATP binding; Molecular Function GO:0006468; protein phosphorylation; Biological Process	NA	Mitogen-activated protein kinase kinase kinase kinase 5	Uncharacterized protein (Fragment)
chr3	Lcro_GLEAN_10009597	3725427	3726171	0.997943	+	NA	NA	NA	Mitogen-activated protein kinase kinase kinase kinase 3	Uncharacterized protein
chr3	Lcro_GLEAN_10009611	3952288	3981777	0.908873	-	IPR000719; Protein kinase, catalytic domain IPR001772; Kinase-associated KA1 IPR002290; Serine/threonine-protein kinase domain IPR017442; Serine/threonine-protein kinase-like domain IPR020635; Tyrosine-protein kinase, catalytic domain	GO:0004672; protein kinase activity; Molecular Function GO:0004674; protein serine/threonine kinase activity; Molecular Function GO:0005524; ATP binding; Molecular Function GO:0006468; protein phosphorylation; Biological Process	K08884	MAP/microtubule affinity-regulating kinase 4	MAP/microtubule affinity-regulating kinase 4a
chr3	Lcro_GLEAN_10019933	4668599	4672331	1	+	IPR001461; Peptidase A1 IPR012848; Propeptide, peptidase A1	GO:0004190; aspartic-type endopeptidase activity; Molecular Function GO:0006508; proteolysis; Biological Process	K01379 CTSD; cathepsin D [EC:3.4.23.5] [EC:3.4.23.5] Cellular Processes; Transport and Catabolism; Lysosome [PATH:ko04142] Human Diseases; Infectious Diseases; Tuberculosis [PATH:ko05152]	Cathepsin D	Uncharacterized protein
chr3	Lcro_GLEAN_10019939	4703596	4722112	0.746369	+	NA	NA	K05069 IL2RB; interleukin 2 receptor beta K05069 Environmental Information Processing; Signal Transduction; Jak-STAT signaling pathway [PATH:ko04630] Environmental Information Processing; Signaling Molecules and Interaction; Cytokine-cytokine receptor interaction [PATH:ko04060] Cellular Processes; Transport and Catabolism; Endocytosis [PATH:ko04144] Human Diseases; Cancers; Transcriptional misreg…	Interleukin-2 receptor subunit beta	Uncharacterized protein (Fragment)
chr3	Lcro_GLEAN_10019940	4733220	4734530	1	+	IPR001073; Complement C1q protein IPR008160; Collagen triple helix repeat	NA	NA	Complement C1q tumor necrosis factor-related protein 6	Uncharacterized protein
chr3	Lcro_GLEAN_10019943	4752960	4768708	0.998814	-	IPR001315; Caspase Recruitment IPR001478; PDZ/DHR/GF IPR008144; Guanylate kinase	GO:0005515; protein binding; Molecular Function GO:0005622; intracellular; Cellular Component GO:0042981; regulation of apoptosis; Biological Process	K07367 CARD11; caspase recruitment domain-containing protein 11 K07367 Organismal Systems; Immune System; T cell receptor signaling pathway [PATH:ko04660] Organismal Systems; Immune System; B cell receptor signaling pathway [PATH:ko04662]	Caspase recruitment domain-containing protein 11	Uncharacterized protein (Fragment)
chr3	Lcro_GLEAN_10019966	5115468	5123109	1	-	IPR007084; BRICHOS	NA	NA	Leukocyte cell-derived chemotaxin 1	Chondromodulin-I
chr3	Lcro_GLEAN_10019970	5183438	5186122	1	-	IPR003961; Fibronectin, type III	GO:0005515; protein binding; Molecular Function	NA	Interleukin-5 receptor subunit alpha	Uncharacterized protein
chr3	Lcro_GLEAN_10019971	5190974	5193467	0.999989	+	IPR001309; Peptidase C14, ICE, catalytic subunit p20 IPR001315; Caspase Recruitment IPR002138; Peptidase C14, caspase non-catalytic subunit p10 IPR002398; Peptidase C14, caspase precursor p45 IPR011600; Peptidase C14, caspase catalytic IPR015917; Peptidase C14, caspase precursor p45, core	GO:0004197; cysteine-type endopeptidase activity; Molecular Function GO:0005515; protein binding; Molecular Function GO:0005622; intracellular; Cellular Component GO:0006508; proteolysis; Biological Process GO:0006915; apoptosis; Biological Process GO:0008234; cysteine-type peptidase activity; Molecular Function GO:0042981; regulation of apoptosis; Biological Process	NA	Caspase-10	Uncharacterized protein (Fragment)
chr3	Lcro_GLEAN_10019973	5198896	5202475	0.987988	+	IPR001309; Peptidase C14, ICE, catalytic subunit p20 IPR001875; Death effector IPR002138; Peptidase C14, caspase non-catalytic subunit p10 IPR002398; Peptidase C14, caspase precursor p45 IPR011600; Peptidase C14, caspase catalytic IPR015917; Peptidase C14, caspase precursor p45, core	GO:0004197; cysteine-type endopeptidase activity; Molecular Function GO:0005515; protein binding; Molecular Function GO:0006508; proteolysis; Biological Process GO:0006915; apoptosis; Biological Process GO:0008234; cysteine-type peptidase activity; Molecular Function GO:0042981; regulation of apoptosis; Biological Process	K04398 CASP8; caspase 8 [EC:3.4.22.61] [EC:3.4.22.61] Cellular Processes; Cell Growth and Death; Apoptosis [PATH:ko04210] Cellular Processes; Cell Growth and Death; p53 signaling pathway [PATH:ko04115] Organismal Systems; Immune System; Toll-like receptor signaling pathway [PATH:ko04620] Organismal Systems; Immune System; NOD-like receptor signaling pathway [PATH:ko04621] Organismal Systems; Immu…	Caspase-8	Caspase-8
chr3	Lcro_GLEAN_10019977	5229628	5231041	0.991562	-	IPR000276; GPCR, rhodopsin-like, 7TM IPR001277; CXC chemokine receptor, type 4 IPR017452; GPCR, rhodopsin-like superfamily	GO:0007186; G-protein coupled receptor protein signaling pathway; Biological Process GO:0016021; integral to membrane; Cellular Component GO:0016494; C-X-C chemokine receptor activity; Molecular Function	NA	C-X-C chemokine receptor type 4	Uncharacterized protein
chr3	Lcro_GLEAN_10020013	5615574	5619607	0.999999	+	IPR000315; Zinc finger, B-box IPR001841; Zinc finger, RING-type IPR001870; B302/SPRY domain IPR003877; SPla/RYanodine receptor SPRY IPR003879; Butyrophylin-like IPR006574; SPRY-associated IPR018957; Zinc finger, C3HC4 RING-type	GO:0005515; protein binding; Molecular Function GO:0005622; intracellular; Cellular Component GO:0008270; zinc ion binding; Molecular Function	NA	E3 ubiquitin/ISG15 ligase TRIM25	Uncharacterized protein
chr3	Lcro_GLEAN_10020017	5650195	5654566	0.999311	-	IPR000315; Zinc finger, B-box IPR001841; Zinc finger, RING-type IPR001870; B302/SPRY domain IPR003877; SPla/RYanodine receptor SPRY IPR003879; Butyrophylin-like IPR006574; SPRY-associated IPR018355; SPla/RYanodine receptor subgroup IPR018957; Zinc finger, C3HC4 RING-type	GO:0005515; protein binding; Molecular Function GO:0005622; intracellular; Cellular Component GO:0008270; zinc ion binding; Molecular Function	NA	Tripartite motif-containing protein 39	Uncharacterized protein (Fragment)
chr3	Lcro_GLEAN_10020021	5695773	5709726	0.990212	-	IPR003034; DNA-binding SAP	GO:0003676; nucleic acid binding; Molecular Function	K12875 ACIN1, ACINUS; apoptotic chromatin condensation inducer in the nucleus K12875 Genetic Information Processing; Transcription; Transcription factors [BR:ko03000] Genetic Information Processing; Transcription; Transcription machinery [BR:ko03021] Genetic Information Processing; Transcription; Spliceosome [PATH:ko03040] Genetic Information Processing; Translation; RNA transport [PATH:ko03013] …	Apoptotic chromatin condensation inducer in the nucleus	Uncharacterized protein (Fragment)
chr3	Lcro_GLEAN_10020034	5860013	5862285	0.905652	+	NA	NA	NA	Cadherin-24	Chromosome 15 SCAF14542, whole genome shotgun sequence
chr3	Lcro_GLEAN_10020036	5930202	6074237	0.535547	+	IPR000233; Cadherin, cytoplasmic domain IPR002126; Cadherin	GO:0005509; calcium ion binding; Molecular Function GO:0007156; homophilic cell adhesion; Biological Process GO:0016020; membrane; Cellular Component	NA	Cadherin-24	Si:dkey-16l23.1
chr3	Lcro_GLEAN_10001480	6162155	6166573	1	-	IPR001309; Peptidase C14, ICE, catalytic subunit p20 IPR001315; Caspase Recruitment IPR002138; Peptidase C14, caspase non-catalytic subunit p10 IPR002398; Peptidase C14, caspase precursor p45 IPR011600; Peptidase C14, caspase catalytic IPR015917; Peptidase C14, caspase precursor p45, core	GO:0004197; cysteine-type endopeptidase activity; Molecular Function GO:0005515; protein binding; Molecular Function GO:0005622; intracellular; Cellular Component GO:0006508; proteolysis; Biological Process GO:0006915; apoptosis; Biological Process GO:0008234; cysteine-type peptidase activity; Molecular Function GO:0042981; regulation of apoptosis; Biological Process	K01370 CASP1; caspase 1 [EC:3.4.22.36] [EC:3.4.22.36] Organismal Systems; Immune System; NOD-like receptor signaling pathway [PATH:ko04621] Organismal Systems; Immune System; Cytosolic DNA-sensing pathway [PATH:ko04623] Human Diseases; Neurodegenerative Diseases; Amyotrophic lateral sclerosis (ALS) [PATH:ko05014] Human Diseases; Infectious Diseases; Salmonella infection [PATH:ko05132] Human Disea…	Caspase-1	Caspase
chr3	Lcro_GLEAN_10001482	6177260	6179329	1	+	IPR003599; Immunoglobulin subtype IPR007110; Immunoglobulin-like	GO:0005515; protein binding; Molecular Function	NA	Fc receptor-like protein 5	Uncharacterized protein
chr3	Lcro_GLEAN_10015749	6789030	6791759	0.497338	-	NA	NA	NA	Protein NLRC3	Si:ch211-255g12.8
chr3	Lcro_GLEAN_10015757	6945111	6950168	0.5	-	IPR001680; WD40 repeat IPR013535; PUL IPR015155; PLAA family ubiquitin binding, PFU IPR017986; WD40-repeat-containing domain IPR019781; WD40 repeat, subgroup IPR019782; WD40 repeat 2	GO:0005515; protein binding; Molecular Function	K14018 PLAA, DOA1, UFD3; phospholipase A-2-activating protein K14018 Genetic Information Processing; Folding, Sorting and Degradation; Protein processing in endoplasmic reticulum [PATH:ko04141]	Phospholipase A-2-activating protein	Uncharacterized protein (Fragment)
chr3	Lcro_GLEAN_10015760	7067056	7084488	0.759421	-	IPR017893; DBB domain	NA	NA	B-cell scaffold protein with ankyrin repeats	Uncharacterized protein (Fragment)
chr3	Lcro_GLEAN_10015762	7156882	7166280	0.804356	+	IPR012918; RTP801, C-terminal	GO:0005737; cytoplasm; Cellular Component GO:0009968; negative regulation of signal transduction; Biological Process	NA	DNA damage-inducible transcript 4-like protein	Uncharacterized protein
chr3	Lcro_GLEAN_10015773	7296085	7329379	0.981291	+	IPR001680; WD40 repeat IPR017986; WD40-repeat-containing domain IPR019781; WD40 repeat, subgroup IPR019782; WD40 repeat 2	GO:0005515; protein binding; Molecular Function	NA	Intraflagellar transport protein 80 homolog	Uncharacterized protein
chr3	Lcro_GLEAN_10015775	7343642	7354749	0.999638	+	IPR000488; Death	GO:0005515; protein binding; Molecular Function GO:0007165; signal transduction; Biological Process	NA	NACHT, LRR and PYD domains-containing protein 1	Uncharacterized protein
chr3	Lcro_GLEAN_10004493	7470611	7522385	0.458338	-	IPR000219; Dbl homology (DH) domain IPR001478; PDZ/DHR/GF IPR001849; Pleckstrin homology domain IPR015212; Regulator of G protein signalling-like fold IPR015721; Rho GTP exchange factor	GO:0005089; Rho guanyl-nucleotide exchange factor activity; Molecular Function GO:0005515; protein binding; Molecular Function GO:0005622; intracellular; Cellular Component GO:0005737; cytoplasm; Cellular Component GO:0035023; regulation of Rho protein signal transduction; Biological Process	K07532 ARHGEF12, LARG; Rho guanine nucleotide exchange factor 12 K07532 Cellular Processes; Cell Motility; Regulation of actin cytoskeleton [PATH:ko04810] Organismal Systems; Circulatory System; Vascular smooth muscle contraction [PATH:ko04270] Organismal Systems; Development; Axon guidance [PATH:ko04360] Human Diseases; Infectious Diseases; Tuberculosis [PATH:ko05152]	Rho guanine nucleotide exchange factor 12	Chromosome 16 SCAF14537, whole genome shotgun sequence. (Fragment)
chr3	Lcro_GLEAN_10015640	8110915	8112111	1	-	NA	NA	NA	Apolipoprotein A-IV	Uncharacterized protein
chr3	Lcro_GLEAN_10015642	8146424	8146869	1	-	IPR007593; Interferon-induced transmembrane protein	GO:0009607; response to biotic stimulus; Biological Process GO:0016021; integral to membrane; Cellular Component	NA	Interferon-induced transmembrane protein 1	Chromosome 16 SCAF14537, whole genome shotgun sequence
chr3	Lcro_GLEAN_10024031	9225488	9225856	0.970616	+	IPR003596; Immunoglobulin V-set, subgroup IPR003599; Immunoglobulin subtype IPR007110; Immunoglobulin-like IPR013106; Immunoglobulin V-set	GO:0005515; protein binding; Molecular Function	K06553	Ig kappa chain V-IV region (Fragment)	Uncharacterized protein (Fragment)
chr3	Lcro_GLEAN_10024032	9230352	9230720	0.983041	+	IPR003596; Immunoglobulin V-set, subgroup IPR003599; Immunoglobulin subtype IPR007110; Immunoglobulin-like IPR013106; Immunoglobulin V-set	GO:0005515; protein binding; Molecular Function	NA	Ig kappa chain V region 3315	Uncharacterized protein (Fragment)
chr3	Lcro_GLEAN_10024061	10410422	10428097	0.648046	+	IPR001073; Complement C1q protein IPR008160; Collagen triple helix repeat	NA	NA	Complement C1q-like protein 2	Putative kinesin K39
chr3	Lcro_GLEAN_10024062	10433479	10442599	1	-	IPR001190; Speract/scavenger receptor IPR008160; Collagen triple helix repeat IPR017448; Speract/scavenger receptor-related	GO:0005044; scavenger receptor activity; Molecular Function GO:0016020; membrane; Cellular Component	K13884 MARCO; macrophage receptor with collagenous structure K13884 Cellular Processes; Transport and Catabolism; Phagosome [PATH:ko04145]	Macrophage receptor MARCO	Macrophage receptor
chr3	Lcro_GLEAN_10024084	10701539	10707968	0.999999	-	IPR015373; Interferon alpha/beta receptor, beta chain	NA	K05130 IFNAR1; interferon receptor 1 K05130 Environmental Information Processing; Signal Transduction; Jak-STAT signaling pathway [PATH:ko04630] Environmental Information Processing; Signaling Molecules and Interaction; Cytokine-cytokine receptor interaction [PATH:ko04060] Organismal Systems; Immune System; Toll-like receptor signaling pathway [PATH:ko04620] Organismal Systems; Immune System; Nat…	Interleukin-10 receptor subunit beta	Uncharacterized protein
chr3	Lcro_GLEAN_10024098	10934432	10946363	0.378472	+	IPR001611; Leucine-rich repeat IPR001841; Zinc finger, RING-type IPR003590; Leucine-rich repeat, ribonuclease inhibitor subtype IPR007111; NACHT nucleoside triphosphatase IPR018957; Zinc finger, C3HC4 RING-type	GO:0005515; protein binding; Molecular Function GO:0008270; zinc ion binding; Molecular Function	NA	Protein NLRC3	Uncharacterized protein
chr3	Lcro_GLEAN_10024101	10980690	11007040	0.999709	+	IPR000219; Dbl homology (DH) domain IPR001452; Src homology-3 domain IPR001715; Calponin homology domain IPR001849; Pleckstrin homology domain IPR011511; Variant SH3	GO:0005089; Rho guanyl-nucleotide exchange factor activity; Molecular Function GO:0005515; protein binding; Molecular Function GO:0005622; intracellular; Cellular Component GO:0035023; regulation of Rho protein signal transduction; Biological Process	K13710 ARHGEF7, PIXB; Rho guanine nucleotide exchange factor 7 K13710 Cellular Processes; Cell Motility; Regulation of actin cytoskeleton [PATH:ko04810]	Rho guanine nucleotide exchange factor 7	Uncharacterized protein (Fragment)
chr3	Lcro_GLEAN_10024113	11264261	11276593	0.983993	-	IPR000157; Toll-Interleukin receptor IPR004075; Interleukin-1 receptor, type I/Toll precursor IPR015621; Interleukin-1 receptor	GO:0004888; transmembrane receptor activity; Molecular Function GO:0007165; signal transduction; Biological Process GO:0031224; intrinsic to membrane; Cellular Component GO:0045087; innate immune response; Biological Process	NA	Interleukin-1 receptor accessory protein-like 1-B	Uncharacterized protein (Fragment)
chr3	Lcro_GLEAN_10005752	11295715	11310238	0.655271	-	IPR001368; TNFR/CD27/30/40/95 cysteine-rich region IPR022248; TNF receptor family, receptor expressed in lymphoid tissues RELT IPR022333; Tumour necrosis factor receptor 19-like	GO:0004872; receptor activity; Molecular Function	NA	Tumor necrosis factor receptor superfamily member 19L	Uncharacterized protein
chr3	Lcro_GLEAN_10005753	11329592	11390196	0.835968	-	IPR000219; Dbl homology (DH) domain	GO:0005089; Rho guanyl-nucleotide exchange factor activity; Molecular Function GO:0005622; intracellular; Cellular Component GO:0035023; regulation of Rho protein signal transduction; Biological Process	NA	Rho guanine nucleotide exchange factor 17	Uncharacterized protein (Fragment)
chr3	Lcro_GLEAN_10005097	11878799	11882830	0.665653	-	NA	NA	NA	Interferon-induced very large GTPase 1	Uncharacterized protein (Fragment)
chr3	Lcro_GLEAN_10005103	12022360	12025535	1	+	IPR003961; Fibronectin, type III IPR015373; Interferon alpha/beta receptor, beta chain	GO:0005515; protein binding; Molecular Function	NA	Interleukin-10 receptor subunit alpha	Uncharacterized protein (Fragment)
chr3	Lcro_GLEAN_10005109	12075366	12115773	0.513176	-	IPR001849; Pleckstrin homology domain IPR010703; Dedicator of cytokinesis IPR021816; Protein of unknown function DUF3398	GO:0005085; guanyl-nucleotide exchange factor activity; Molecular Function GO:0005515; protein binding; Molecular Function GO:0005525; GTP binding; Molecular Function GO:0051020; GTPase binding; Molecular Function	NA	Dedicator of cytokinesis protein 10	Uncharacterized protein (Fragment)
chr3	Lcro_GLEAN_10014972	12323751	12360961	0.99966	-	IPR000038; Cell division/GTP binding protein	GO:0005525; GTP binding; Molecular Function GO:0007049; cell cycle; Biological Process	NA	Septin-7	Uncharacterized protein (Fragment)
chr3	Lcro_GLEAN_10014973	12367076	12368321	1	-	IPR001811; Chemokine interleukin-8-like domain	GO:0005576; extracellular region; Cellular Component GO:0006955; immune response; Biological Process GO:0008009; chemokine activity; Molecular Function	K12964 CCL4; C-C motif chemokine 4 K12964 Environmental Information Processing; Signaling Molecules and Interaction; Cytokine-cytokine receptor interaction [PATH:ko04060] Organismal Systems; Immune System; Cytosolic DNA-sensing pathway [PATH:ko04623] Organismal Systems; Immune System; Chemokine signaling pathway [PATH:ko04062] Human Diseases; Infectious Diseases; Salmonella infection [PATH:ko0513…	C-C motif chemokine 4	CCL4 chemokine
chr3	Lcro_GLEAN_10014976	12443533	12447608	1	+	IPR003961; Fibronectin, type III IPR015321; Interleukin-6 receptor alpha chain, binding	GO:0005515; protein binding; Molecular Function	K05070 IL2RG; interleukin 2 receptor gamma K05070 Environmental Information Processing; Signal Transduction; Jak-STAT signaling pathway [PATH:ko04630] Environmental Information Processing; Signaling Molecules and Interaction; Cytokine-cytokine receptor interaction [PATH:ko04060] Cellular Processes; Transport and Catabolism; Endocytosis [PATH:ko04144] Human Diseases; Immune Diseases; Primary immun…	Cytokine receptor common subunit gamma	Uncharacterized protein (Fragment)
chr3	Lcro_GLEAN_10014982	12532775	12554164	0.997716	+	IPR000834; Peptidase M14, carboxypeptidase A IPR015567; Peptidase M14B, caboxypeptidase D	GO:0004181; metallocarboxypeptidase activity; Molecular Function GO:0004185; serine-type carboxypeptidase activity; Molecular Function GO:0006508; proteolysis; Biological Process GO:0008270; zinc ion binding; Molecular Function	K07752	Carboxypeptidase D	Uncharacterized protein (Fragment)
chr3	Lcro_GLEAN_10014984	12585817	12590758	0.417751	-	IPR007593; Interferon-induced transmembrane protein	GO:0009607; response to biotic stimulus; Biological Process GO:0016021; integral to membrane; Cellular Component	NA	Tumor suppressor candidate 5 homolog	Uncharacterized protein
chr3	Lcro_GLEAN_10014990	12803009	12805165	1	-	IPR008417; B-cell receptor-associated 31-like	GO:0005783; endoplasmic reticulum; Cellular Component GO:0006886; intracellular protein transport; Biological Process GO:0016021; integral to membrane; Cellular Component	NA	B-cell receptor-associated protein 29	Uncharacterized protein
chr3	Lcro_GLEAN_10012880	13355348	13378590	0.998935	-	IPR010286; S-adenosyl-L-methionine dependent methyltransferase, predicted	GO:0008168; methyltransferase activity; Molecular Function	K11393	Methyltransferase-like protein 16	Uncharacterized protein
chr3	Lcro_GLEAN_10012885	13475219	13487853	0.999992	+	IPR000103; Pyridine nucleotide-disulphide oxidoreductase, class-II IPR001327; Pyridine nucleotide-disulphide oxidoreductase, NAD-binding region IPR013027; FAD-dependent pyridine nucleotide-disulphide oxidoreductase IPR017941; Rieske [2Fe-2S] iron-sulphur domain	GO:0016491; oxidoreductase activity; Molecular Function GO:0050660; flavin adenine dinucleotide binding; Molecular Function GO:0051537; 2 iron, 2 sulfur cluster binding; Molecular Function GO:0055114; oxidation-reduction process; Biological Process	NA	Apoptosis-inducing factor 3	Uncharacterized protein
chr3	Lcro_GLEAN_10012889	13518782	13524534	0.997436	+	IPR000742; Epidermal growth factor-like, type 3 IPR002049; EGF-like, laminin IPR006210; Epidermal growth factor-like	GO:0005515; protein binding; Molecular Function	NA	Scavenger receptor class F member 1	Uncharacterized protein (Fragment)
chr3	Lcro_GLEAN_10012894	13560410	13583079	0.405839	+	IPR001766; Transcription factor, fork head IPR002059; Cold-shock protein, DNA-binding	GO:0003677; DNA binding; Molecular Function GO:0003700; sequence-specific DNA binding transcription factor activity; Molecular Function GO:0006355; regulation of transcription, DNA-dependent; Biological Process GO:0043565; sequence-specific DNA binding; Molecular Function	K09407	Forkhead box protein N1	Chromosome 17 SCAF14760, whole genome shotgun sequence
chr3	Lcro_GLEAN_10012905	13696387	13701085	1	-	IPR001464; Annexin IPR002388; Annexin, type I IPR018502; Annexin repeat	GO:0004859; phospholipase inhibitor activity; Molecular Function GO:0005509; calcium ion binding; Molecular Function GO:0005544; calcium-dependent phospholipid binding; Molecular Function	NA	Annexin A1	Annexin
chr3	Lcro_GLEAN_10006755	14341619	14406749	0.797237	+	IPR001680; WD40 repeat IPR010286; S-adenosyl-L-methionine dependent methyltransferase, predicted IPR017986; WD40-repeat-containing domain IPR019781; WD40 repeat, subgroup IPR019782; WD40 repeat 2 IPR020472; G-protein beta WD-40 repeat	GO:0005515; protein binding; Molecular Function GO:0008168; methyltransferase activity; Molecular Function	K11393	Methyltransferase-like protein 16	Uncharacterized protein
chr3	Lcro_GLEAN_10006763	14628508	14645865	0.999707	+	IPR006139; D-isomer specific 2-hydroxyacid dehydrogenase, catalytic domain IPR006140; D-isomer specific 2-hydroxyacid dehydrogenase, NAD-binding	GO:0008152; metabolic process; Biological Process GO:0016616; oxidoreductase activity, acting on the CH-OH group of donors, NAD or NADP as acceptor; Molecular Function GO:0048037; cofactor binding; Molecular Function GO:0051287; NAD or NADH binding; Molecular Function	NA	C-terminal-binding protein 2	C-terminal-binding protein 2
chr3	Lcro_GLEAN_10018396	14826877	14827440	0.999799	-	IPR000421; Coagulation factor 5/8 type, C-terminal IPR006585; Fucolectin tachylectin-4 pentraxin-1	GO:0007155; cell adhesion; Biological Process	NA	Fucolectin-5	Uncharacterized protein
chr3	Lcro_GLEAN_10018397	14828389	14830766	0.661828	-	IPR000421; Coagulation factor 5/8 type, C-terminal IPR006585; Fucolectin tachylectin-4 pentraxin-1	GO:0007155; cell adhesion; Biological Process	NA	Fucolectin	Uncharacterized protein
chr3	Lcro_GLEAN_10018398	14833481	14837302	1	-	IPR000421; Coagulation factor 5/8 type, C-terminal IPR006585; Fucolectin tachylectin-4 pentraxin-1	GO:0007155; cell adhesion; Biological Process	NA	Fucolectin-4	Uncharacterized protein (Fragment)
chr3	Lcro_GLEAN_10018399	14838120	14839780	1	-	IPR000421; Coagulation factor 5/8 type, C-terminal IPR006585; Fucolectin tachylectin-4 pentraxin-1	GO:0007155; cell adhesion; Biological Process	NA	Fucolectin-4	FBP32
chr3	Lcro_GLEAN_10018414	15309712	15310590	0.999703	+	IPR008653; Immediate early response	NA	NA	Immediate early response gene 5-like protein	Uncharacterized protein (Fragment)
chr3	Lcro_GLEAN_10018425	15684958	15783758	0.736871	-	IPR001356; Homeobox IPR005542; PBX	GO:0003700; sequence-specific DNA binding transcription factor activity; Molecular Function GO:0005634; nucleus; Cellular Component GO:0006355; regulation of transcription, DNA-dependent; Biological Process GO:0043565; sequence-specific DNA binding; Molecular Function	K15610 PBX3; pre-B-cell leukemia transcription factor 3 K15610 Human Diseases; Cancers; Transcriptional misregulation in cancers [PATH:ko05202]	Pre-B-cell leukemia transcription factor 3	Uncharacterized protein
chr3	Lcro_GLEAN_10018428	15890182	15901405	0.725152	+	IPR000219; Dbl homology (DH) domain	GO:0005089; Rho guanyl-nucleotide exchange factor activity; Molecular Function GO:0005622; intracellular; Cellular Component GO:0035023; regulation of Rho protein signal transduction; Biological Process	NA	Rho guanine nucleotide exchange factor 17	Uncharacterized protein (Fragment)
chr3	Lcro_GLEAN_10018429	15911725	15935410	0.850028	+	IPR001368; TNFR/CD27/30/40/95 cysteine-rich region IPR022248; TNF receptor family, receptor expressed in lymphoid tissues RELT IPR022333; Tumour necrosis factor receptor 19-like	GO:0004872; receptor activity; Molecular Function	K05156 TNFRSF19L, RELT; tumor necrosis factor receptor superfamily member 19-like K05156 Environmental Information Processing; Signaling Molecules and Interaction; Cytokine-cytokine receptor interaction [PATH:ko04060]	Tumor necrosis factor receptor superfamily member 19L	Uncharacterized protein
chr3	Lcro_GLEAN_10018431	15944418	16002087	0.999419	+	IPR001060; Fps/Fes/Fer/CIP4 homology IPR001452; Src homology-3 domain IPR011511; Variant SH3	GO:0005515; protein binding; Molecular Function	NA	FCH and double SH3 domains protein 2	Uncharacterized protein (Fragment)
chr3	Lcro_GLEAN_10018438	16122142	16124494	0.999992	-	NA	NA	NA	Biogenesis of lysosome-related organelles complex 1 subunit 3	Uncharacterized protein (Fragment)
chr3	Lcro_GLEAN_10013183	16676617	16690417	0.999912	-	IPR004020; Pyrin	NA	NA	Protein NLRC3	Uncharacterized protein
chr3	Lcro_GLEAN_10013187	16717098	16719284	0.999242	+	IPR001134; Netrin domain IPR015526; Frizzled-related IPR020067; Frizzled domain	GO:0005515; protein binding; Molecular Function	NA	Secreted frizzled-related protein 2	Uncharacterized protein (Fragment)
chr3	Lcro_GLEAN_10013198	17068656	17207862	0.874201	+	IPR000157; Toll-Interleukin receptor IPR003598; Immunoglobulin subtype 2 IPR003599; Immunoglobulin subtype IPR004075; Interleukin-1 receptor, type I/Toll precursor IPR007110; Immunoglobulin-like IPR013098; Immunoglobulin I-set IPR015621; Interleukin-1 receptor	GO:0004888; transmembrane receptor activity; Molecular Function GO:0005515; protein binding; Molecular Function GO:0007165; signal transduction; Biological Process GO:0031224; intrinsic to membrane; Cellular Component GO:0045087; innate immune response; Biological Process	K05170	Interleukin-1 receptor accessory protein-like 1-B	Uncharacterized protein (Fragment)
chr3	Lcro_GLEAN_10012235	18314256	18323680	0.606697	+	NA	NA	NA	Intraflagellar transport protein 74 homolog	Uncharacterized protein (Fragment)
chr3	Lcro_GLEAN_10006860	18586242	18590371	0.999983	-	IPR006804; BCL7	NA	NA	B-cell CLL/lymphoma 7 protein family member B-B	Uncharacterized protein
chr3	Lcro_GLEAN_10006871	18866043	18879490	0.963221	-	IPR000233; Cadherin, cytoplasmic domain IPR002126; Cadherin	GO:0005509; calcium ion binding; Molecular Function GO:0007156; homophilic cell adhesion; Biological Process GO:0016020; membrane; Cellular Component	NA	Cadherin-6	Uncharacterized protein (Fragment)
chr3	Lcro_GLEAN_10006875	18982904	18983710	0.999989	-	IPR001111; Transforming growth factor-beta, N-terminal IPR001839; Transforming growth factor-beta, C-terminal IPR002405; Inhibin, alpha subunit IPR015615; Transforming growth factor-beta-related	GO:0005576; extracellular region; Cellular Component GO:0008083; growth factor activity; Molecular Function GO:0040007; growth; Biological Process	NA	Inhibin beta A chain	Activin beta A (Fragment)
chr3	Lcro_GLEAN_10006877	18990477	19001417	0.896219	-	IPR001318; Inhibin, beta C subunit IPR015615; Transforming growth factor-beta-related	GO:0005179; hormone activity; Molecular Function GO:0005576; extracellular region; Cellular Component	NA	Inhibin beta A chain	Uncharacterized protein (Fragment)
chr3	Lcro_GLEAN_10003971	19093060	19102094	0.934695	-	NA	NA	NA	Mucin-1	Polymorphic mucin truncated splice variant C4/2/100r2.2
chr4	Lcro_GLEAN_10010795	768	4153	0.999399	-	IPR001611; Leucine-rich repeat IPR003590; Leucine-rich repeat, ribonuclease inhibitor subtype	GO:0005515; protein binding; Molecular Function	NA	NACHT, LRR and PYD domains-containing protein 12	Si:ch211-258f1.3
chr4	Lcro_GLEAN_10010796	22754	118865	0.423033	-	IPR003590; Leucine-rich repeat, ribonuclease inhibitor subtype	NA	NA	Protein NLRC3	NOD-like receptor C
chr4	Lcro_GLEAN_10022511	2584783	2623501	0.995771	-	IPR000719; Protein kinase, catalytic domain IPR001245; Serine-threonine/tyrosine-protein kinase IPR001452; Src homology-3 domain IPR002290; Serine/threonine-protein kinase domain IPR011511; Variant SH3 IPR015785; Mitogen activated protein kinase kinase kinase 9/10/11-like IPR020635; Tyrosine-protein kinase, catalytic domain	GO:0004672; protein kinase activity; Molecular Function GO:0004674; protein serine/threonine kinase activity; Molecular Function GO:0004709; MAP kinase kinase kinase activity; Molecular Function GO:0005515; protein binding; Molecular Function GO:0005524; ATP binding; Molecular Function GO:0006468; protein phosphorylation; Biological Process	K04419 MAP3K11, MLK3; mitogen-activated protein kinase kinase kinase 11 [EC:2.7.11.25] [EC:2.7.11.25] Environmental Information Processing; Signal Transduction; Two-component system [BR:ko02022] Environmental Information Processing; Signal Transduction; MAPK signaling pathway [PATH:ko04010]	Mitogen-activated protein kinase kinase kinase 11	Uncharacterized protein
chr4	Lcro_GLEAN_10022537	3432542	3443164	0.798501	-	IPR003599; Immunoglobulin subtype IPR007110; Immunoglobulin-like IPR013162; CD80-like, immunoglobulin C2-set	GO:0005515; protein binding; Molecular Function	K06786 JAM4, JCAM; junction adhesion molecule 4 K06786 Cellular Processes; Cell Communication; Tight junction [PATH:ko04530] Human Diseases; Infectious Diseases; Epithelial cell signaling in Helicobacter pylori infection [PATH:ko05120]	Immunoglobulin superfamily member 5	Chromosome undetermined SCAF10538, whole genome shotgun sequence
chr4	Lcro_GLEAN_10022543	3521042	3538714	1	-	IPR001368; TNFR/CD27/30/40/95 cysteine-rich region IPR022342; Tumour necrosis factor receptor 19	GO:0004872; receptor activity; Molecular Function	K05155 TNFRSF19, TROY; tumor necrosis factor receptor superfamily member 19 K05155 Environmental Information Processing; Signaling Molecules and Interaction; Cytokine-cytokine receptor interaction [PATH:ko04060]	Tumor necrosis factor receptor superfamily member 19	Tumor necrosis factor receptor superfamily member 19
chr4	Lcro_GLEAN_10022553	3666017	3667237	0.999015	-	IPR001766; Transcription factor, fork head	GO:0003700; sequence-specific DNA binding transcription factor activity; Molecular Function GO:0006355; regulation of transcription, DNA-dependent; Biological Process GO:0043565; sequence-specific DNA binding; Molecular Function	NA	Forkhead box protein G1	Forkhead box G2
chr4	Lcro_GLEAN_10022556	3676779	3687350	0.986019	-	IPR001073; Complement C1q protein	NA	NA	Complement C1q and tumor necrosis factor-related protein 9	Complement-c1q tumor necrosis factor-like protein (Fragment)
chr4	Lcro_GLEAN_10014309	4647548	4666220	0.997532	-	IPR000198; Rho GTPase-activating protein domain IPR001202; WW/Rsp5/WWP IPR001452; Src homology-3 domain IPR001849; Pleckstrin homology domain IPR015767; Rho GTPase activating	GO:0005515; protein binding; Molecular Function GO:0005622; intracellular; Cellular Component GO:0007165; signal transduction; Biological Process	NA	Rho GTPase-activating protein 27	Uncharacterized protein (Fragment)
chr4	Lcro_GLEAN_10020672	5302455	5306152	0.726751	+	IPR005012; Daxx protein	NA	K02308 DAXX; death-associated protein 6 K02308 Environmental Information Processing; Signal Transduction; Two-component system [BR:ko02022] Environmental Information Processing; Signal Transduction; MAPK signaling pathway [PATH:ko04010] Human Diseases; Neurodegenerative Diseases; Amyotrophic lateral sclerosis (ALS) [PATH:ko05014] Human Diseases; Infectious Diseases; Herpes simplex infection [PATH…	Death domain-associated protein 6	Uncharacterized protein
chr4	Lcro_GLEAN_10020694	5999732	6009958	0.408635	+	IPR001304; C-type lectin IPR003990; Pancreatitis-associated protein IPR007513; Uncharacterised protein family SERF	GO:0005488; binding; Molecular Function	NA	Macrophage mannose receptor 1	Zinc finger protein 706
chr4	Lcro_GLEAN_10020695	6013429	6024419	0.804668	-	IPR001111; Transforming growth factor-beta, N-terminal IPR001839; Transforming growth factor-beta, C-terminal IPR015615; Transforming growth factor-beta-related	GO:0008083; growth factor activity; Molecular Function GO:0040007; growth; Biological Process	K16622	Bone morphogenetic protein 5	Uncharacterized protein (Fragment)
chr4	Lcro_GLEAN_10020703	6275253	6283784	0.756886	+	IPR001304; C-type lectin IPR002353; Type II antifreeze protein	GO:0005488; binding; Molecular Function GO:0005529; sugar binding; Molecular Function	NA	C-type lectin domain family 4 member E	C-type lectin domain family 4 member E
chr4	Lcro_GLEAN_10020704	6285657	6288222	0.97986	+	IPR001304; C-type lectin IPR002353; Type II antifreeze protein	GO:0005488; binding; Molecular Function GO:0005529; sugar binding; Molecular Function	K10064	C-type lectin domain family 17, member A	Immune-related lectin-like receptor 1
chr4	Lcro_GLEAN_10020717	6422194	6427376	0.679512	+	IPR001039; MHC class I, alpha chain, alpha1/alpha2 IPR003597; Immunoglobulin C1-set IPR007110; Immunoglobulin-like	GO:0005515; protein binding; Molecular Function GO:0006955; immune response; Biological Process GO:0016020; membrane; Cellular Component GO:0019882; antigen processing and presentation; Biological Process GO:0042612; MHC class I protein complex; Cellular Component	K06751 MHC1; major histocompatibility complex, class I K06751 Environmental Information Processing; Signaling Molecules and Interaction; Cell adhesion molecules (CAMs) [PATH:ko04514] Cellular Processes; Transport and Catabolism; Endocytosis [PATH:ko04144] Cellular Processes; Transport and Catabolism; Phagosome [PATH:ko04145] Organismal Systems; Immune System; Natural killer cell mediated cytotoxi…	Major histocompatibility complex class I-related gene protein	MHC class II antigen alpha chain
chr4	Lcro_GLEAN_10025943	7696776	7715203	1	+	IPR000301; Tetraspanin, subgroup IPR018499; Tetraspanin	GO:0016021; integral to membrane; Cellular Component	K06537	CD151 antigen	Uncharacterized protein
chr4	Lcro_GLEAN_10025949	7901083	7940691	0.658441	+	IPR001194; DENN IPR005112; dDENN IPR005113; uDENN	NA	NA	MAP kinase-activating death domain protein	Uncharacterized protein
chr4	Lcro_GLEAN_10025952	8020030	8027579	0.727291	+	NA	NA	NA	Mucin-15	Uncharacterized protein
chr4	Lcro_GLEAN_10025955	8351189	8353036	0.667981	+	IPR000372; Leucine-rich repeat-containing N-terminal IPR000483; Cysteine-rich flanking region, C-terminal domain IPR001611; Leucine-rich repeat IPR003591; Leucine-rich repeat, typical subtype IPR003598; Immunoglobulin subtype 2 IPR003599; Immunoglobulin subtype IPR007110; Immunoglobulin-like IPR013098; Immunoglobulin I-set	GO:0005515; protein binding; Molecular Function	NA	Leucine-rich repeat and immunoglobulin-like domain-containing nogo receptor-interacting protein 1-B	Uncharacterized protein (Fragment)
chr4	Lcro_GLEAN_10025959	8473972	8478276	0.999242	-	IPR001293; Zinc finger, TRAF-type IPR001841; Zinc finger, RING-type IPR002083; MATH IPR018957; Zinc finger, C3HC4 RING-type	GO:0005515; protein binding; Molecular Function GO:0008270; zinc ion binding; Molecular Function	K03175 TRAF6; TNF receptor-associated factor 6 K03175 Genetic Information Processing; Folding, Sorting and Degradation; SNAREs [BR:ko04131] Genetic Information Processing; Folding, Sorting and Degradation; Ubiquitin mediated proteolysis [PATH:ko04120] Environmental Information Processing; Signal Transduction; Two-component system [BR:ko02022] Environmental Information Processing; Signal Transduct…	TNF receptor-associated factor 6	TNF receptor-associated factor 6 (Fragment)
chr4	Lcro_GLEAN_10025991	9907627	9928792	0.705602	+	IPR001190; Speract/scavenger receptor IPR017448; Speract/scavenger receptor-related	GO:0005044; scavenger receptor activity; Molecular Function GO:0016020; membrane; Cellular Component	NA	Antigen WC1.1	Uncharacterized protein (Fragment)
chr4	Lcro_GLEAN_10025995	9976537	9977081	0.984058	-	IPR010345; Interleukin-17, metazoa IPR020440; Interleukin-17, chordata	GO:0005125; cytokine activity; Molecular Function GO:0005576; extracellular region; Cellular Component GO:0006954; inflammatory response; Biological Process	K05494	Interleukin-17F	Interleukin-17A/F-1
chr4	Lcro_GLEAN_10025996	9996681	9997864	0.999999	+	IPR010345; Interleukin-17, metazoa	GO:0005125; cytokine activity; Molecular Function GO:0005576; extracellular region; Cellular Component GO:0006954; inflammatory response; Biological Process	NA	Interleukin-17A	Interleukin-17A/F-2
chr4	Lcro_GLEAN_10026001	10052341	10053285	0.999945	+	IPR001766; Transcription factor, fork head	GO:0003700; sequence-specific DNA binding transcription factor activity; Molecular Function GO:0006355; regulation of transcription, DNA-dependent; Biological Process GO:0043565; sequence-specific DNA binding; Molecular Function	K09395	Forkhead box protein B1	Uncharacterized protein
chr4	Lcro_GLEAN_10026005	10106147	10116242	0.999964	-	IPR001464; Annexin IPR002389; Annexin, type II IPR018502; Annexin repeat	GO:0004859; phospholipase inhibitor activity; Molecular Function GO:0005509; calcium ion binding; Molecular Function GO:0005544; calcium-dependent phospholipid binding; Molecular Function GO:0008092; cytoskeletal protein binding; Molecular Function	NA	Annexin A2	Uncharacterized protein
chr4	Lcro_GLEAN_10007271	10178722	10179178	0.995435	-	NA	NA	K05403 TIRAP; toll-interleukin 1 receptor (TIR) domain-containing adaptor protein K05403 Organismal Systems; Immune System; Toll-like receptor signaling pathway [PATH:ko04620] Human Diseases; Infectious Diseases; Pertussis [PATH:ko05133] Human Diseases; Infectious Diseases; Tuberculosis [PATH:ko05152]	Toll/interleukin-1 receptor domain-containing adapter protein	Uncharacterized protein (Fragment)
chr4	Lcro_GLEAN_10024514	11097143	11102821	0.825449	-	NA	NA	K16473	Intraflagellar transport protein 20 homolog	Intraflagellar transport protein 20 homolog
chr4	Lcro_GLEAN_10024545	11853717	11874754	0.961565	-	IPR001766; Transcription factor, fork head	GO:0003700; sequence-specific DNA binding transcription factor activity; Molecular Function GO:0006355; regulation of transcription, DNA-dependent; Biological Process GO:0043565; sequence-specific DNA binding; Molecular Function	K07201 FOXO1; forkhead box protein O1 K07201 Organismal Systems; Endocrine System; Insulin signaling pathway [PATH:ko04910] Human Diseases; Cancers; Pathways in cancer [PATH:ko05200] Human Diseases; Cancers; Transcriptional misregulation in cancers [PATH:ko05202] Human Diseases; Cancers; Prostate cancer [PATH:ko05215]	Forkhead box protein O1	Uncharacterized protein (Fragment)
chr4	Lcro_GLEAN_10024551	12157329	12183696	0.874382	+	IPR003585; Neurexin/syndecan/glycophorin C IPR003598; Immunoglobulin subtype 2 IPR003599; Immunoglobulin subtype IPR007110; Immunoglobulin-like IPR013098; Immunoglobulin I-set IPR013162; CD80-like, immunoglobulin C2-set	GO:0005515; protein binding; Molecular Function	K06782	Cell adhesion molecule 2	Uncharacterized protein (Fragment)
chr4	Lcro_GLEAN_10024557	12259197	12260243	0.679157	-	IPR004031; PMP-22/EMP/MP20/Claudin IPR006187; Claudin	GO:0005198; structural molecule activity; Molecular Function GO:0005923; tight junction; Cellular Component GO:0016020; membrane; Cellular Component	NA	Claudin-8	Uncharacterized protein
chr4	Lcro_GLEAN_10024558	12262064	12262852	0.999242	-	IPR004031; PMP-22/EMP/MP20/Claudin IPR006187; Claudin	GO:0005198; structural molecule activity; Molecular Function GO:0005923; tight junction; Cellular Component GO:0016020; membrane; Cellular Component	K06087 CLDN; claudin K06087 Environmental Information Processing; Signaling Molecules and Interaction; Cell adhesion molecules (CAMs) [PATH:ko04514] Cellular Processes; Cell Communication; Tight junction [PATH:ko04530] Organismal Systems; Immune System; Leukocyte transendothelial migration [PATH:ko04670] Human Diseases; Infectious Diseases; Hepatitis C [PATH:ko05160]	Claudin-8	Uncharacterized protein
chr4	Lcro_GLEAN_10024559	12264377	12265252	0.99963	-	IPR004031; PMP-22/EMP/MP20/Claudin IPR006187; Claudin	GO:0005198; structural molecule activity; Molecular Function GO:0005923; tight junction; Cellular Component GO:0016020; membrane; Cellular Component	NA	Claudin-8	Uncharacterized protein (Fragment)
chr4	Lcro_GLEAN_10024560	12266686	12267375	0.999242	-	IPR003556; Claudin-14 IPR004031; PMP-22/EMP/MP20/Claudin IPR006187; Claudin	GO:0005198; structural molecule activity; Molecular Function GO:0005923; tight junction; Cellular Component GO:0016020; membrane; Cellular Component	NA	Claudin-17	Claudin 8a
chr4	Lcro_GLEAN_10024592	13097010	13099024	0.999015	-	IPR001368; TNFR/CD27/30/40/95 cysteine-rich region	GO:0004872; receptor activity; Molecular Function	K05143 TNFRSF6B, DCR3; tumor necrosis factor receptor superfamily member 6B K05143 Environmental Information Processing; Signaling Molecules and Interaction; Cytokine-cytokine receptor interaction [PATH:ko04060]	Tumor necrosis factor receptor superfamily member 6B	Uncharacterized protein
chr4	Lcro_GLEAN_10005672	13508038	13516079	0.993467	+	IPR021816; Protein of unknown function DUF3398	NA	NA	Dedicator of cytokinesis protein 6	Uncharacterized protein (Fragment)
chr4	Lcro_GLEAN_10005674	13517477	13530899	0.993466	+	IPR010703; Dedicator of cytokinesis	GO:0005085; guanyl-nucleotide exchange factor activity; Molecular Function GO:0005525; GTP binding; Molecular Function GO:0051020; GTPase binding; Molecular Function	NA	Dedicator of cytokinesis protein 7	Uncharacterized protein (Fragment)
chr4	Lcro_GLEAN_10010636	14187340	14219366	0.996083	-	IPR001293; Zinc finger, TRAF-type IPR001841; Zinc finger, RING-type IPR002083; MATH IPR018957; Zinc finger, C3HC4 RING-type	GO:0005515; protein binding; Molecular Function GO:0008270; zinc ion binding; Molecular Function	K09848 TRAF4; TNF receptor-associated factor 4 K09848 Human Diseases; Cancers; Pathways in cancer [PATH:ko05200] Human Diseases; Cancers; Small cell lung cancer [PATH:ko05222]	TNF receptor-associated factor 4	Uncharacterized protein
chr4	Lcro_GLEAN_10010646	14319990	14328224	0.121707	-	IPR001870; B302/SPRY domain IPR003877; SPla/RYanodine receptor SPRY IPR003879; Butyrophylin-like IPR006574; SPRY-associated IPR018355; SPla/RYanodine receptor subgroup	GO:0005515; protein binding; Molecular Function	NA	Tripartite motif-containing protein 16	Uncharacterized protein (Fragment)
chr4	Lcro_GLEAN_10002066	14534130	14545180	0.49919	-	IPR000488; Death	GO:0005515; protein binding; Molecular Function GO:0007165; signal transduction; Biological Process	NA	NACHT, LRR and PYD domains-containing protein 1	Uncharacterized protein
chr4	Lcro_GLEAN_10002068	14559416	14565348	1	-	NA	NA	NA	Intraflagellar transport protein 80 homolog	Uncharacterized protein
chr4	Lcro_GLEAN_10007900	14752492	14787667	0.99906	-	IPR000719; Protein kinase, catalytic domain IPR001245; Serine-threonine/tyrosine-protein kinase IPR001452; Src homology-3 domain IPR002290; Serine/threonine-protein kinase domain IPR015785; Mitogen activated protein kinase kinase kinase 9/10/11-like IPR020635; Tyrosine-protein kinase, catalytic domain	GO:0004672; protein kinase activity; Molecular Function GO:0004674; protein serine/threonine kinase activity; Molecular Function GO:0004709; MAP kinase kinase kinase activity; Molecular Function GO:0005515; protein binding; Molecular Function GO:0005524; ATP binding; Molecular Function GO:0006468; protein phosphorylation; Biological Process	K04418 MAP3K10, MLK2; mitogen-activated protein kinase kinase kinase 10 [EC:2.7.11.25] [EC:2.7.11.25] Environmental Information Processing; Signal Transduction; Two-component system [BR:ko02022] Environmental Information Processing; Signal Transduction; MAPK signaling pathway [PATH:ko04010]	Mitogen-activated protein kinase kinase kinase 10	Uncharacterized protein (Fragment)
chr4	Lcro_GLEAN_10007911	15021451	15023873	0.99924	-	IPR001111; Transforming growth factor-beta, N-terminal IPR001839; Transforming growth factor-beta, C-terminal IPR015615; Transforming growth factor-beta-related	GO:0008083; growth factor activity; Molecular Function GO:0040007; growth; Biological Process	NA	Bone morphogenetic protein 4	Chromosome 16 SCAF14537, whole genome shotgun sequence. (Fragment)
chr4	Lcro_GLEAN_10007918	15167624	15170639	0.520471	-	IPR015902; Alpha amylase	NA	NA	4F2 cell-surface antigen heavy chain	Uncharacterized protein
chr4	Lcro_GLEAN_10016221	15280168	15303325	0.900563	+	IPR000020; Anaphylatoxin/fibulin IPR001134; Netrin domain IPR001599; Alpha-2-macroglobulin IPR002890; Alpha-2-macroglobulin, N-terminal IPR009048; Alpha-macroglobulin, receptor-binding IPR011625; Alpha-2-macroglobulin, N-terminal 2 IPR011626; A-macroglobulin complement component IPR018933; Netrin module, non-TIMP type IPR019565; Alpha-2-macroglobulin, thiol-ester bond-forming	GO:0004866; endopeptidase inhibitor activity; Molecular Function GO:0005515; protein binding; Molecular Function GO:0005576; extracellular region; Cellular Component GO:0005615; extracellular space; Cellular Component	NA	Complement C3 (Fragment)	Uncharacterized protein (Fragment)
chr4	Lcro_GLEAN_10016222	15306434	15325399	0.99328	-	IPR003598; Immunoglobulin subtype 2 IPR003599; Immunoglobulin subtype IPR007110; Immunoglobulin-like IPR013106; Immunoglobulin V-set IPR013151; Immunoglobulin	GO:0005515; protein binding; Molecular Function	K06467 CD22, SIGLEC2; CD22 antigen K06467 Environmental Information Processing; Signaling Molecules and Interaction; Cell adhesion molecules (CAMs) [PATH:ko04514] Organismal Systems; Immune System; Hematopoietic cell lineage [PATH:ko04640] Organismal Systems; Immune System; B cell receptor signaling pathway [PATH:ko04662]	B-cell receptor CD22	Uncharacterized protein (Fragment)
chr4	Lcro_GLEAN_10016224	15335155	15345637	0.262059	+	IPR003598; Immunoglobulin subtype 2 IPR003599; Immunoglobulin subtype IPR007110; Immunoglobulin-like IPR013151; Immunoglobulin	GO:0005515; protein binding; Molecular Function	NA	B-cell receptor CD22	Uncharacterized protein (Fragment)
chr4	Lcro_GLEAN_10016225	15347936	15356315	1	-	IPR003598; Immunoglobulin subtype 2 IPR003599; Immunoglobulin subtype IPR007110; Immunoglobulin-like IPR013098; Immunoglobulin I-set IPR013106; Immunoglobulin V-set IPR013151; Immunoglobulin	GO:0005515; protein binding; Molecular Function	NA	B-cell receptor CD22	Uncharacterized protein (Fragment)
chr4	Lcro_GLEAN_10013875	16428570	16429462	0.691492	-	IPR001073; Complement C1q protein	NA	NA	Complement C1q-like protein 2	Uncharacterized protein
chr4	Lcro_GLEAN_10013877	16436999	16438089	0.999566	-	IPR001073; Complement C1q protein	NA	NA	Complement C1q-like protein 4	Uncharacterized protein
chr4	Lcro_GLEAN_10013878	16439423	16442798	0.998703	-	IPR000315; Zinc finger, B-box IPR001841; Zinc finger, RING-type IPR001870; B302/SPRY domain IPR003877; SPla/RYanodine receptor SPRY IPR003879; Butyrophylin-like IPR006574; SPRY-associated IPR018355; SPla/RYanodine receptor subgroup IPR018957; Zinc finger, C3HC4 RING-type	GO:0005515; protein binding; Molecular Function GO:0005622; intracellular; Cellular Component GO:0008270; zinc ion binding; Molecular Function	NA	Tripartite motif-containing protein 16	Uncharacterized protein
chr4	Lcro_GLEAN_10013881	16454160	16460813	0.998995	+	IPR000436; Sushi/SCR/CCP IPR001254; Peptidase S1/S6, chymotrypsin/Hap IPR001314; Peptidase S1A, chymotrypsin-type IPR002035; von Willebrand factor, type A	GO:0004252; serine-type endopeptidase activity; Molecular Function GO:0005515; protein binding; Molecular Function GO:0006508; proteolysis; Biological Process	K01332 C2; complement component 2 [EC:3.4.21.43] [EC:3.4.21.43] Organismal Systems; Immune System; Complement and coagulation cascades [PATH:ko04610] Human Diseases; Immune Diseases; Systemic lupus erythematosus [PATH:ko05322] Human Diseases; Infectious Diseases; Pertussis [PATH:ko05133] Human Diseases; Infectious Diseases; Staphylococcus aureus infection [PATH:ko05150]	Complement C2	Factor B/C2B (Fragment)
chr4	Lcro_GLEAN_10013902	17139760	17371421	0.993417	-	IPR002126; Cadherin	GO:0005509; calcium ion binding; Molecular Function GO:0007156; homophilic cell adhesion; Biological Process GO:0016020; membrane; Cellular Component	NA	Calsyntenin-2	Novel protein similar to vertebrate calsyntenin 2 (CLSTN2)
chr4	Lcro_GLEAN_10003540	17913161	17945274	0.999698	-	IPR001599; Alpha-2-macroglobulin IPR002890; Alpha-2-macroglobulin, N-terminal IPR009048; Alpha-macroglobulin, receptor-binding IPR011625; Alpha-2-macroglobulin, N-terminal 2 IPR011626; A-macroglobulin complement component IPR019565; Alpha-2-macroglobulin, thiol-ester bond-forming	GO:0004866; endopeptidase inhibitor activity; Molecular Function GO:0005576; extracellular region; Cellular Component GO:0005615; extracellular space; Cellular Component	K03910 A2M; alpha-2-macroglobulin K03910 Organismal Systems; Immune System; Complement and coagulation cascades [PATH:ko04610]	Alpha-2-macroglobulin	Uncharacterized protein
chr4	Lcro_GLEAN_10003542	17973302	18008230	0.823624	-	IPR002110; Ankyrin repeat IPR020683; Ankyrin repeat-containing domain	GO:0005515; protein binding; Molecular Function	NA	NF-kappa-B inhibitor zeta	Uncharacterized protein (Fragment)
chr4	Lcro_GLEAN_10022419	18053534	18059353	0.984148	-	IPR001073; Complement C1q protein	NA	NA	Complement C1q-like protein 3	Uncharacterized protein
chr4	Lcro_GLEAN_10022430	18312734	18411407	0.9988	+	IPR003598; Immunoglobulin subtype 2 IPR003599; Immunoglobulin subtype IPR007110; Immunoglobulin-like IPR013098; Immunoglobulin I-set IPR013106; Immunoglobulin V-set	GO:0005515; protein binding; Molecular Function	K06791	Immunoglobulin superfamily member 11	Uncharacterized protein (Fragment)
chr4	Lcro_GLEAN_10022441	18714485	18753556	0.931687	+	IPR010911; Rab-binding domain IPR017455; Zinc finger, FYVE-related	GO:0006886; intracellular protein transport; Biological Process GO:0017137; Rab GTPase binding; Molecular Function	NA	Regulating synaptic membrane exocytosis protein 2	Uncharacterized protein
chr4	Lcro_GLEAN_10022442	18757253	18812206	0.99646	+	IPR000008; C2 calcium-dependent membrane targeting IPR001478; PDZ/DHR/GF IPR018029; C2 membrane targeting protein	GO:0005515; protein binding; Molecular Function	K15297	Regulating synaptic membrane exocytosis protein 2	Uncharacterized protein (Fragment)
chr4	Lcro_GLEAN_10022444	18821789	18840351	0.593554	+	NA	NA	NA	Regulating synaptic membrane exocytosis protein 2	Regulating synaptic membrane exocytosis 2a
chr4	Lcro_GLEAN_10022445	18844737	18849210	0.996082	+	IPR000008; C2 calcium-dependent membrane targeting IPR018029; C2 membrane targeting protein	GO:0005515; protein binding; Molecular Function	NA	Regulating synaptic membrane exocytosis protein 2	Regulating synaptic membrane exocytosis 2a
chr4	Lcro_GLEAN_10022460	19320694	19326788	0.992033	-	IPR007087; Zinc finger, C2H2-type IPR015880; Zinc finger, C2H2-like	GO:0005622; intracellular; Cellular Component GO:0008270; zinc ion binding; Molecular Function	K09209	Krueppel-like factor 10	Uncharacterized protein (Fragment)
chr4	Lcro_GLEAN_10019074	20279896	20280816	1	+	IPR001766; Transcription factor, fork head	GO:0003700; sequence-specific DNA binding transcription factor activity; Molecular Function GO:0006355; regulation of transcription, DNA-dependent; Biological Process GO:0043565; sequence-specific DNA binding; Molecular Function	K09405	Forkhead box protein L2	Forkhead transcription factor L2
chr4	Lcro_GLEAN_10019084	20446897	20453457	0.999242	-	IPR003123; Vacuolar sorting protein 9 IPR013995; Vacuolar sorting protein 9, subgroup	NA	NA	Ras and Rab interactor 2	Uncharacterized protein (Fragment)
chr4	Lcro_GLEAN_10005998	21978571	21980552	0.999709	-	IPR000074; Apolipoprotein A1/A4/E	GO:0005576; extracellular region; Cellular Component GO:0006869; lipid transport; Biological Process GO:0008289; lipid binding; Molecular Function GO:0042157; lipoprotein metabolic process; Biological Process	NA	Apolipoprotein A-I	Apolipoprotein A-I
chr4	Lcro_GLEAN_10006003	22058465	22060447	0.60097	+	IPR015484; CD3 protein, gamma/delta subunit	NA	NA	T-cell surface glycoprotein CD3 gamma chain	CD3 gamma/delta protein
chr4	Lcro_GLEAN_10006004	22062192	22063389	0.607009	+	IPR015484; CD3 protein, gamma/delta subunit	NA	NA	T-cell surface glycoprotein CD3 gamma chain	CD3 gamma/delta protein
chr4	Lcro_GLEAN_10006005	22068124	22069060	1	-	IPR015477; CD3 epsilon chain	NA	NA	T-cell surface glycoprotein CD3 epsilon chain	T cell surface glycoprotein CD3 epsilon
chr4	Lcro_GLEAN_10002356	22460078	22463105	0.9992	-	IPR015902; Alpha amylase	NA	NA	4F2 cell-surface antigen heavy chain	Uncharacterized protein
chr4	Lcro_GLEAN_10009216	23355301	23379745	0.599737	+	IPR009048; Alpha-macroglobulin, receptor-binding IPR011625; Alpha-2-macroglobulin, N-terminal 2 IPR011626; A-macroglobulin complement component	GO:0005576; extracellular region; Cellular Component GO:0005615; extracellular space; Cellular Component	NA	Alpha-2-macroglobulin	Uncharacterized protein
chr4	Lcro_GLEAN_10009218	23397119	23412987	0.832529	+	IPR001599; Alpha-2-macroglobulin IPR002890; Alpha-2-macroglobulin, N-terminal IPR009048; Alpha-macroglobulin, receptor-binding IPR011625; Alpha-2-macroglobulin, N-terminal 2	GO:0004866; endopeptidase inhibitor activity; Molecular Function GO:0005576; extracellular region; Cellular Component	NA	Alpha-2-macroglobulin	Uncharacterized protein
chr4	Lcro_GLEAN_10009220	23443097	23479958	0.303602	+	IPR001599; Alpha-2-macroglobulin IPR002890; Alpha-2-macroglobulin, N-terminal IPR009048; Alpha-macroglobulin, receptor-binding IPR011625; Alpha-2-macroglobulin, N-terminal 2 IPR011626; A-macroglobulin complement component IPR019565; Alpha-2-macroglobulin, thiol-ester bond-forming	GO:0004866; endopeptidase inhibitor activity; Molecular Function GO:0005576; extracellular region; Cellular Component GO:0005615; extracellular space; Cellular Component	NA	Alpha-2-macroglobulin	Uncharacterized protein
chr5	Lcro_GLEAN_10003293	766846	771339	0.5	+	IPR001346; Interferon regulatory factor IPR019471; Interferon regulatory factor-3	GO:0003700; sequence-specific DNA binding transcription factor activity; Molecular Function GO:0005634; nucleus; Cellular Component GO:0006355; regulation of transcription, DNA-dependent; Biological Process	K04693 IRF9, ISGF3G, P48; interferon regulatory factor 9 K04693 Environmental Information Processing; Signal Transduction; Jak-STAT signaling pathway [PATH:ko04630] Organismal Systems; Development; Osteoclast differentiation [PATH:ko04380] Human Diseases; Infectious Diseases; Measles [PATH:ko05162] Human Diseases; Infectious Diseases; Influenza A [PATH:ko05164] Human Diseases; Infectious Diseases…	Interferon regulatory factor 8	Interferon regulatory factor 9
chr5	Lcro_GLEAN_10003296	809138	815633	1	+	IPR006052; Tumour necrosis factor	GO:0005164; tumor necrosis factor receptor binding; Molecular Function GO:0006955; immune response; Biological Process GO:0016020; membrane; Cellular Component	K04721 TNFSF10, TRAIL; tumor necrosis factor ligand superfamily member 10 K04721 Environmental Information Processing; Signaling Molecules and Interaction; Cytokine-cytokine receptor interaction [PATH:ko04060] Cellular Processes; Cell Growth and Death; Apoptosis [PATH:ko04210] Organismal Systems; Immune System; Natural killer cell mediated cytotoxicity [PATH:ko04650] Human Diseases; Infectious Di…	Tumor necrosis factor ligand superfamily member 10	TNF-related apoptosis inducing ligand
chr5	Lcro_GLEAN_10003304	882392	888446	0.491404	+	IPR003590; Leucine-rich repeat, ribonuclease inhibitor subtype IPR007111; NACHT nucleoside triphosphatase	NA	NA	Protein NLRC3	Uncharacterized protein
chr5	Lcro_GLEAN_10013623	1234217	1244601	0.548826	-	IPR007757; MT-A70	GO:0006139; nucleobase, nucleoside, nucleotide and nucleic acid metabolic process; Biological Process GO:0008168; methyltransferase activity; Molecular Function	NA	Methyltransferase-like protein 14	Uncharacterized protein
chr5	Lcro_GLEAN_10004240	2063963	2146153	0.995793	-	IPR001033; Alpha-catenin IPR006077; Vinculin/alpha-catenin	GO:0005198; structural molecule activity; Molecular Function GO:0007155; cell adhesion; Biological Process GO:0015629; actin cytoskeleton; Cellular Component GO:0045296; cadherin binding; Molecular Function	NA	Catenin alpha-2	Uncharacterized protein
chr5	Lcro_GLEAN_10019350	2376370	2416515	0.786923	-	IPR000998; MAM domain	GO:0016020; membrane; Cellular Component	NA	Zonadhesin	Uncharacterized protein (Fragment)
chr5	Lcro_GLEAN_10019357	2531909	2560695	0.0809141	+	IPR000082; SEA	NA	NA	S-antigen protein	MUC17 protein (Fragment)
chr5	Lcro_GLEAN_10019368	2835631	2918112	0.934983	+	IPR000608; Ubiquitin-conjugating enzyme, E2 IPR001370; Baculoviral inhibition of apoptosis protein repeat IPR022103; Protein of unknown function DUF3643	GO:0005622; intracellular; Cellular Component GO:0016881; acid-amino acid ligase activity; Molecular Function GO:0043687; post-translational protein modification; Biological Process	K10586 BIRC6, BRUCE; baculoviral IAP repeat-containing protein 6 (apollon) [EC:6.3.2.19] [EC:6.3.2.19] Genetic Information Processing; Folding, Sorting and Degradation; SNAREs [BR:ko04131] Genetic Information Processing; Folding, Sorting and Degradation; Ubiquitin mediated proteolysis [PATH:ko04120]	Baculoviral IAP repeat-containing protein 6	Uncharacterized protein (Fragment)
chr5	Lcro_GLEAN_10019373	3143086	3154112	1	-	IPR000233; Cadherin, cytoplasmic domain IPR002126; Cadherin IPR014868; Cadherin prodomain-like	GO:0005509; calcium ion binding; Molecular Function GO:0007155; cell adhesion; Biological Process GO:0007156; homophilic cell adhesion; Biological Process GO:0016020; membrane; Cellular Component GO:0016021; integral to membrane; Cellular Component	K05689 CDHE, CDH1; cadherin 1, type 1, E-cadherin K05689 Environmental Information Processing; Signaling Molecules and Interaction; Cell adhesion molecules (CAMs) [PATH:ko04514] Cellular Processes; Cell Communication; Adherens junction [PATH:ko04520] Human Diseases; Cancers; Pathways in cancer [PATH:ko05200] Human Diseases; Cancers; Thyroid cancer [PATH:ko05216] Human Diseases; Cancers; Melanoma …	Cadherin-1	Uncharacterized protein
chr5	Lcro_GLEAN_10019377	3293228	3358848	0.610256	-	IPR001033; Alpha-catenin IPR006077; Vinculin/alpha-catenin	GO:0005198; structural molecule activity; Molecular Function GO:0007155; cell adhesion; Biological Process GO:0015629; actin cytoskeleton; Cellular Component GO:0045296; cadherin binding; Molecular Function	NA	Catenin alpha-2	Uncharacterized protein
chr5	Lcro_GLEAN_10023098	4199584	4214536	0.46887	-	IPR003590; Leucine-rich repeat, ribonuclease inhibitor subtype IPR007111; NACHT nucleoside triphosphatase IPR008494; Protein of unknown function DUF776	NA	NA	Protein NLRC3	Uncharacterized protein
chr5	Lcro_GLEAN_10023116	4984112	4997893	1	-	IPR003891; Initiation factor eIF-4 gamma, MA3	NA	NA	Programmed cell death protein 4	Uncharacterized protein
chr5	Lcro_GLEAN_10023144	5624806	5646125	0.99289	-	IPR000910; High mobility group, HMG1/HMG2 IPR013558; CTNNB1 binding, N-teminal	GO:0003677; DNA binding; Molecular Function	K04492 LEF1; lymphoid enhancer-binding factor 1 K04492 Environmental Information Processing; Signal Transduction; Wnt signaling pathway [PATH:ko04310] Cellular Processes; Cell Communication; Adherens junction [PATH:ko04520] Organismal Systems; Endocrine System; Melanogenesis [PATH:ko04916] Human Diseases; Cancers; Pathways in cancer [PATH:ko05200] Human Diseases; Cancers; Colorectal cancer [PATH:…	Lymphoid enhancer-binding factor 1	Uncharacterized protein
chr5	Lcro_GLEAN_10023145	5656411	5668304	0.993447	-	IPR013558; CTNNB1 binding, N-teminal	NA	NA	Lymphoid enhancer-binding factor 1	Uncharacterized protein
chr5	Lcro_GLEAN_10023147	5730261	5733566	1	-	IPR001309; Peptidase C14, ICE, catalytic subunit p20 IPR002138; Peptidase C14, caspase non-catalytic subunit p10 IPR002398; Peptidase C14, caspase precursor p45 IPR011600; Peptidase C14, caspase catalytic IPR015469; Caspase-6 IPR015917; Peptidase C14, caspase precursor p45, core	GO:0004197; cysteine-type endopeptidase activity; Molecular Function GO:0005737; cytoplasm; Cellular Component GO:0006508; proteolysis; Biological Process GO:0006915; apoptosis; Biological Process GO:0008234; cysteine-type peptidase activity; Molecular Function	K04396 CASP6; caspase 6 [EC:3.4.22.59] [EC:3.4.22.59] Cellular Processes; Cell Growth and Death; Apoptosis [PATH:ko04210]	Caspase-6	Uncharacterized protein
chr5	Lcro_GLEAN_10023148	5735818	5738837	1	-	IPR001309; Peptidase C14, ICE, catalytic subunit p20 IPR002138; Peptidase C14, caspase non-catalytic subunit p10 IPR002398; Peptidase C14, caspase precursor p45 IPR011600; Peptidase C14, caspase catalytic IPR015469; Caspase-6 IPR015917; Peptidase C14, caspase precursor p45, core	GO:0004197; cysteine-type endopeptidase activity; Molecular Function GO:0005737; cytoplasm; Cellular Component GO:0006508; proteolysis; Biological Process GO:0006915; apoptosis; Biological Process GO:0008234; cysteine-type peptidase activity; Molecular Function	NA	Caspase-6	Uncharacterized protein
chr5	Lcro_GLEAN_10016862	6222507	6222832	1	-	NA	NA	NA	Lysozyme g	G-lysozyme
chr5	Lcro_GLEAN_10016863	6225989	6226800	1	-	IPR002152; Glycoside hydrolase, family 23 IPR008258; Lytic transglycosylase-like, catalytic	GO:0003796; lysozyme activity; Molecular Function GO:0009253; peptidoglycan catabolic process; Biological Process GO:0016998; cell wall macromolecule catabolic process; Biological Process	NA	Lysozyme g	G-type lysozyme B
chr5	Lcro_GLEAN_10016864	6227993	6230309	1	-	IPR002152; Glycoside hydrolase, family 23 IPR004020; Pyrin	GO:0003796; lysozyme activity; Molecular Function GO:0009253; peptidoglycan catabolic process; Biological Process GO:0016998; cell wall macromolecule catabolic process; Biological Process	NA	Lysozyme g	ASC
chr5	Lcro_GLEAN_10016874	6426271	6434465	0.999145	+	IPR008160; Collagen triple helix repeat	NA	NA	Scavenger receptor class A member 3	Uncharacterized protein (Fragment)
chr5	Lcro_GLEAN_10016883	6622235	6650754	0.618151	-	NA	NA	NA	Cell death regulator Aven	Uncharacterized protein
chr5	Lcro_GLEAN_10016898	7142533	7269172	0.248847	-	IPR000034; Laminin B type IV IPR001791; Laminin G domain IPR002049; EGF-like, laminin IPR006210; Epidermal growth factor-like IPR008211; Laminin, N-terminal IPR009254; Laminin I IPR010307; Laminin II IPR012679; Laminin G, subdomain 1 IPR012680; Laminin G, subdomain 2 IPR018031; Laminin B, subgroup	GO:0005102; receptor binding; Molecular Function GO:0005515; protein binding; Molecular Function GO:0005604; basement membrane; Cellular Component GO:0005606; laminin-1 complex; Cellular Component GO:0007155; cell adhesion; Biological Process GO:0030155; regulation of cell adhesion; Biological Process GO:0030334; regulation of cell migration; Biological Process GO:0031012; extracellular matrix; C…	K05637 LAMA1_2; laminin, alpha 1/2 K05637 Environmental Information Processing; Signaling Molecules and Interaction; Cytokines [BR:ko04052] Environmental Information Processing; Signaling Molecules and Interaction; ECM-receptor interaction [PATH:ko04512] Cellular Processes; Cell Communication; Focal adhesion [PATH:ko04510] Human Diseases; Cancers; Pathways in cancer [PATH:ko05200] Human Diseases;…	Laminin subunit alpha-2	Uncharacterized protein (Fragment)
chr5	Lcro_GLEAN_10001116	7399272	7401141	0.999709	+	IPR022750; Interferon regulatory factor 2-binding protein 1 &amp; 2	NA	NA	Interferon regulatory factor 2-binding protein 2-B	Interferon regulatory factor 2-binding protein 2-A
chr5	Lcro_GLEAN_10008872	7690783	7702261	0.999522	+	IPR001356; Homeobox IPR005542; PBX	GO:0003700; sequence-specific DNA binding transcription factor activity; Molecular Function GO:0005634; nucleus; Cellular Component GO:0006355; regulation of transcription, DNA-dependent; Biological Process GO:0043565; sequence-specific DNA binding; Molecular Function	NA	Pre-B-cell leukemia transcription factor 1	Uncharacterized protein
chr5	Lcro_GLEAN_10008880	7806570	7808222	0.763064	+	IPR000315; Zinc finger, B-box IPR001841; Zinc finger, RING-type IPR001870; B302/SPRY domain IPR003877; SPla/RYanodine receptor SPRY IPR003879; Butyrophylin-like IPR006574; SPRY-associated IPR018957; Zinc finger, C3HC4 RING-type	GO:0005515; protein binding; Molecular Function GO:0005622; intracellular; Cellular Component GO:0008270; zinc ion binding; Molecular Function	NA	Tripartite motif-containing protein 16	Uncharacterized protein (Fragment)
chr5	Lcro_GLEAN_10008887	7866354	7870258	0.679149	-	IPR001841; Zinc finger, RING-type IPR003590; Leucine-rich repeat, ribonuclease inhibitor subtype IPR007111; NACHT nucleoside triphosphatase	GO:0005515; protein binding; Molecular Function GO:0008270; zinc ion binding; Molecular Function	NA	Protein NLRC3	Si:ch211-15j1.3 (Fragment)
chr5	Lcro_GLEAN_10002373	8153297	8161727	0.999518	-	IPR003150; DNA-binding RFX IPR007668; RFX1 transcription activation region	GO:0003677; DNA binding; Molecular Function GO:0005634; nucleus; Cellular Component GO:0006355; regulation of transcription, DNA-dependent; Biological Process GO:0030528; transcription regulator activity; Molecular Function GO:0045449; regulation of transcription; Biological Process	K09175 RFXX; regulatory factor X, other K09175 Cellular Processes; Cell Growth and Death; Cell cycle - yeast [PATH:ko04111]	MHC class II regulatory factor RFX1	Uncharacterized protein (Fragment)
chr5	Lcro_GLEAN_10006447	8662788	8682057	0.985781	+	IPR000159; Ras-association IPR002110; Ankyrin repeat IPR020683; Ankyrin repeat-containing domain	GO:0005515; protein binding; Molecular Function GO:0007165; signal transduction; Biological Process	NA	Apoptosis-stimulating of p53 protein 2	Uncharacterized protein (Fragment)
chr5	Lcro_GLEAN_10014058	9166349	9194270	0.889936	+	IPR000504; RNA recognition motif domain IPR003891; Initiation factor eIF-4 gamma, MA3	GO:0003676; nucleic acid binding; Molecular Function	NA	Programmed cell death protein 4	Uncharacterized protein (Fragment)
chr5	Lcro_GLEAN_10014071	9419141	9504419	0.636313	-	IPR000219; Dbl homology (DH) domain IPR000306; Zinc finger, FYVE-type IPR000719; Protein kinase, catalytic domain IPR000961; AGC-kinase, C-terminal IPR001849; Pleckstrin homology domain IPR002219; Protein kinase C-like, phorbol ester/diacylglycerol binding IPR002290; Serine/threonine-protein kinase domain IPR017442; Serine/threonine-protein kinase-like domain IPR017455; Zinc finger, FYVE-related …	GO:0004672; protein kinase activity; Molecular Function GO:0004674; protein serine/threonine kinase activity; Molecular Function GO:0005089; Rho guanyl-nucleotide exchange factor activity; Molecular Function GO:0005515; protein binding; Molecular Function GO:0005524; ATP binding; Molecular Function GO:0005622; intracellular; Cellular Component GO:0006468; protein phosphorylation; Biological Proce…	K06068 NPKC; novel protein kinase C [EC:2.7.11.13] [EC:2.7.11.13] Cellular Processes; Cell Communication; Tight junction [PATH:ko04530] Organismal Systems; Circulatory System; Vascular smooth muscle contraction [PATH:ko04270]	Protein kinase C delta type	Uncharacterized protein (Fragment)
chr5	Lcro_GLEAN_10014094	9742011	9750410	0.572161	+	IPR000980; SH2 motif IPR001217; STAT transcription factor, core IPR013799; STAT transcription factor, protein interaction IPR013800; STAT transcription factor, all-alpha IPR013801; STAT transcription factor, DNA-binding	GO:0003700; sequence-specific DNA binding transcription factor activity; Molecular Function GO:0004871; signal transducer activity; Molecular Function GO:0005515; protein binding; Molecular Function GO:0005634; nucleus; Cellular Component GO:0006355; regulation of transcription, DNA-dependent; Biological Process GO:0007165; signal transduction; Biological Process	NA	Signal transducer and activator of transcription 1-alpha/beta	Uncharacterized protein
chr5	Lcro_GLEAN_10014103	9839707	9853587	0.966036	-	IPR001073; Complement C1q protein	NA	NA	Complement C1q-like protein 4	Chromosome 11 SCAF14979, whole genome shotgun sequence
chr5	Lcro_GLEAN_10001272	10011587	10025087	0.970395	-	IPR007111; NACHT nucleoside triphosphatase	NA	NA	Protein NLRC3	Uncharacterized protein
chr5	Lcro_GLEAN_10001274	10036228	10054058	0.999418	+	IPR007110; Immunoglobulin-like	GO:0005515; protein binding; Molecular Function	NA	CD48 antigen	Zgc:171897 protein
chr5	Lcro_GLEAN_10001273	10025170	10075754	0.640229	-	NA	NA	NA	C-type lectin domain family 6 member A	Uncharacterized protein
chr5	Lcro_GLEAN_10001284	10624031	10625601	0.675731	+	IPR001190; Speract/scavenger receptor IPR017448; Speract/scavenger receptor-related	GO:0005044; scavenger receptor activity; Molecular Function GO:0016020; membrane; Cellular Component	NA	Deleted in malignant brain tumors 1 protein	Uncharacterized protein
chr5	Lcro_GLEAN_10012250	10771460	10778734	0.44702	-	IPR003597; Immunoglobulin C1-set IPR007110; Immunoglobulin-like	GO:0005515; protein binding; Molecular Function	NA	T-cell receptor beta chain T17T-22	Uncharacterized protein (Fragment)
chr5	Lcro_GLEAN_10012256	10879226	10927844	0.991424	-	IPR001173; Glycosyl transferase, family 2 IPR001611; Leucine-rich repeat IPR001870; B302/SPRY domain IPR003590; Leucine-rich repeat, ribonuclease inhibitor subtype IPR003877; SPla/RYanodine receptor SPRY IPR003879; Butyrophylin-like IPR004020; Pyrin IPR006574; SPRY-associated IPR007111; NACHT nucleoside triphosphatase	GO:0005515; protein binding; Molecular Function	NA	NACHT, LRR and PYD domains-containing protein 12	Si:ch211-258f1.3
chr5	Lcro_GLEAN_10012260	10934980	10947591	0.993662	-	IPR001611; Leucine-rich repeat IPR001870; B302/SPRY domain IPR003590; Leucine-rich repeat, ribonuclease inhibitor subtype IPR003877; SPla/RYanodine receptor SPRY IPR003879; Butyrophylin-like IPR004020; Pyrin IPR006574; SPRY-associated IPR007111; NACHT nucleoside triphosphatase IPR018355; SPla/RYanodine receptor subgroup	GO:0005515; protein binding; Molecular Function	NA	NACHT, LRR and PYD domains-containing protein 12	Si:ch211-258f1.3
chr5	Lcro_GLEAN_10012286	11429416	11496731	0.221739	-	IPR001878; Zinc finger, CCHC-type IPR003599; Immunoglobulin subtype IPR007110; Immunoglobulin-like IPR013106; Immunoglobulin V-set	GO:0003676; nucleic acid binding; Molecular Function GO:0005515; protein binding; Molecular Function GO:0008270; zinc ion binding; Molecular Function	NA	CD48 antigen	Uncharacterized protein (Fragment)
chr5	Lcro_GLEAN_10009454	11940344	11945157	0.249984	+	IPR009886; HCaRG IPR017920; COMM domain	NA	NA	COMM domain-containing protein 7	Uncharacterized protein
chr5	Lcro_GLEAN_10009459	12108520	12109871	0.998793	-	IPR007110; Immunoglobulin-like IPR015631; Signalling lymphocyte activation molecule	GO:0005515; protein binding; Molecular Function	NA	CD48 antigen	Uncharacterized protein (Fragment)
chr5	Lcro_GLEAN_10009463	12228126	12235854	0.987132	+	IPR001304; C-type lectin IPR002353; Type II antifreeze protein	GO:0005488; binding; Molecular Function GO:0005529; sugar binding; Molecular Function	NA	C-type mannose receptor 2	Nattectin
chr5	Lcro_GLEAN_10009477	12511347	12524176	1	+	IPR007632; Anoctamin/TMEM 16	NA	NA	Anoctamin-6	Uncharacterized protein (Fragment)
chr5	Lcro_GLEAN_10018301	13263354	13263935	1	+	IPR001870; B302/SPRY domain IPR003877; SPla/RYanodine receptor SPRY IPR003879; Butyrophylin-like IPR006574; SPRY-associated IPR018355; SPla/RYanodine receptor subgroup	GO:0005515; protein binding; Molecular Function	NA	Tripartite motif-containing protein 16	Uncharacterized protein (Fragment)
chr5	Lcro_GLEAN_10018300	13177257	13390364	0.435944	-	IPR000157; Toll-Interleukin receptor IPR003598; Immunoglobulin subtype 2 IPR003599; Immunoglobulin subtype IPR004075; Interleukin-1 receptor, type I/Toll precursor IPR007110; Immunoglobulin-like IPR013098; Immunoglobulin I-set IPR015621; Interleukin-1 receptor	GO:0004888; transmembrane receptor activity; Molecular Function GO:0005515; protein binding; Molecular Function GO:0007165; signal transduction; Biological Process GO:0031224; intrinsic to membrane; Cellular Component GO:0045087; innate immune response; Biological Process	K05170	Interleukin-1 receptor accessory protein-like 1-B	Uncharacterized protein (Fragment)
chr5	Lcro_GLEAN_10018313	13684779	13701356	0.978595	-	IPR000483; Cysteine-rich flanking region, C-terminal domain IPR001611; Leucine-rich repeat IPR003591; Leucine-rich repeat, typical subtype IPR003598; Immunoglobulin subtype 2 IPR003599; Immunoglobulin subtype IPR007110; Immunoglobulin-like IPR013098; Immunoglobulin I-set	GO:0005515; protein binding; Molecular Function	NA	Immunoglobulin superfamily member 10	Uncharacterized protein (Fragment)
chr5	Lcro_GLEAN_10001592	14116814	14169781	0.398291	+	IPR000020; Anaphylatoxin/fibulin IPR001134; Netrin domain IPR001599; Alpha-2-macroglobulin IPR002890; Alpha-2-macroglobulin, N-terminal IPR009048; Alpha-macroglobulin, receptor-binding IPR011625; Alpha-2-macroglobulin, N-terminal 2 IPR011626; A-macroglobulin complement component IPR018933; Netrin module, non-TIMP type IPR019565; Alpha-2-macroglobulin, thiol-ester bond-forming	GO:0004866; endopeptidase inhibitor activity; Molecular Function GO:0005515; protein binding; Molecular Function GO:0005576; extracellular region; Cellular Component GO:0005615; extracellular space; Cellular Component	K03990 C3; complement component 3 K03990 Cellular Processes; Transport and Catabolism; Phagosome [PATH:ko04145] Organismal Systems; Immune System; Complement and coagulation cascades [PATH:ko04610] Human Diseases; Immune Diseases; Systemic lupus erythematosus [PATH:ko05322] Human Diseases; Infectious Diseases; Pertussis [PATH:ko05133] Human Diseases; Infectious Diseases; Legionellosis [PATH:ko051…	Complement C3 (Fragment)	Complement component c3
chr5	Lcro_GLEAN_10014233	14390856	14397179	0.999974	-	IPR000008; C2 calcium-dependent membrane targeting IPR018029; C2 membrane targeting protein	GO:0005515; protein binding; Molecular Function	NA	Regulating synaptic membrane exocytosis protein 1	Uncharacterized protein (Fragment)
chr5	Lcro_GLEAN_10014234	14397596	14441723	0.422085	-	IPR000008; C2 calcium-dependent membrane targeting IPR001478; PDZ/DHR/GF IPR017455; Zinc finger, FYVE-related IPR018029; C2 membrane targeting protein	GO:0005515; protein binding; Molecular Function	K15297	Regulating synaptic membrane exocytosis protein 1	Uncharacterized protein
chr5	Lcro_GLEAN_10014238	14510630	14511664	0.999594	-	IPR000276; GPCR, rhodopsin-like, 7TM IPR000355; Chemokine receptor IPR001277; CXC chemokine receptor, type 4 IPR017452; GPCR, rhodopsin-like superfamily	GO:0004950; chemokine receptor activity; Molecular Function GO:0007186; G-protein coupled receptor protein signaling pathway; Biological Process GO:0016021; integral to membrane; Cellular Component GO:0016494; C-X-C chemokine receptor activity; Molecular Function	K04182 CCR7; C-C chemokine receptor type 7 K04182 Environmental Information Processing; Signaling Molecules and Interaction; Cytokine-cytokine receptor interaction [PATH:ko04060] Organismal Systems; Immune System; Chemokine signaling pathway [PATH:ko04062] Human Diseases; Cancers; Transcriptional misregulation in cancers [PATH:ko05202]	C-C chemokine receptor type 7	Uncharacterized protein (Fragment)
chr5	Lcro_GLEAN_10020292	15549458	15563800	0.224737	-	IPR001846; von Willebrand factor, type D domain IPR006552; VWC out IPR014853; Conserved-cysteine-rich domain	NA	NA	Mucin-19	Uncharacterized protein
chr5	Lcro_GLEAN_10020295	15646831	15659547	1	+	IPR003439; ABC transporter-like IPR003593; ATPase, AAA+ type, core IPR010509; ABC transporter, N-terminal IPR017940; ABC transporter, integral membrane type 1	GO:0000166; nucleotide binding; Molecular Function GO:0005524; ATP binding; Molecular Function GO:0006810; transport; Biological Process GO:0016020; membrane; Cellular Component GO:0016887; ATPase activity; Molecular Function GO:0017111; nucleoside-triphosphatase activity; Molecular Function	K05676 ABCD2, ALDL1; ATP-binding cassette, subfamily D (ALD), member 2 K05676 Environmental Information Processing; Membrane Transport; Transporters [BR:ko02000] Environmental Information Processing; Membrane Transport; Solute carrier family [BR:ko02001] Environmental Information Processing; Membrane Transport; ABC transporters [PATH:ko02010] Cellular Processes; Transport and Catabolism; Peroxiso…	ATP-binding cassette sub-family D member 2	Uncharacterized protein
chr5	Lcro_GLEAN_10020312	16145687	16148721	1	+	IPR003556; Claudin-14 IPR004031; PMP-22/EMP/MP20/Claudin IPR006187; Claudin	GO:0005198; structural molecule activity; Molecular Function GO:0005923; tight junction; Cellular Component GO:0016020; membrane; Cellular Component	K06087 CLDN; claudin K06087 Environmental Information Processing; Signaling Molecules and Interaction; Cell adhesion molecules (CAMs) [PATH:ko04514] Cellular Processes; Cell Communication; Tight junction [PATH:ko04530] Organismal Systems; Immune System; Leukocyte transendothelial migration [PATH:ko04670] Human Diseases; Infectious Diseases; Hepatitis C [PATH:ko05160]	Claudin-7-A	Chromosome 7 SCAF14650, whole genome shotgun sequence. (Fragment)
chr5	Lcro_GLEAN_10020328	16726864	16736023	0.99963	+	IPR009066; Alpha-2-macroglobulin receptor-associated protein, domain 1 IPR010483; Alpha-2-macroglobulin RAP, C-terminal	GO:0005783; endoplasmic reticulum; Cellular Component GO:0008201; heparin binding; Molecular Function GO:0050750; low-density lipoprotein receptor binding; Molecular Function	NA	Alpha-2-macroglobulin receptor-associated protein	Uncharacterized protein
chr5	Lcro_GLEAN_10020338	16946101	16949307	1	-	IPR000866; Alkyl hydroperoxide reductase subunit C/ Thiol specific antioxidant IPR017936; Thioredoxin-like IPR019479; Peroxiredoxin, C-terminal	GO:0016209; antioxidant activity; Molecular Function GO:0016491; oxidoreductase activity; Molecular Function GO:0045454; cell redox homeostasis; Biological Process GO:0051920; peroxiredoxin activity; Molecular Function	K03386	Peroxiredoxin	Peroxiredoxin-1
chr5	Lcro_GLEAN_10020341	16990417	17003771	0.999265	+	IPR001159; Double-stranded RNA-binding IPR006561; DZF	GO:0003725; double-stranded RNA binding; Molecular Function GO:0005622; intracellular; Cellular Component	NA	Interleukin enhancer-binding factor 3 homolog	Uncharacterized protein (Fragment)
chr5	Lcro_GLEAN_10004550	17057438	17092011	0.990822	-	IPR000020; Anaphylatoxin/fibulin IPR001134; Netrin domain IPR001599; Alpha-2-macroglobulin IPR002890; Alpha-2-macroglobulin, N-terminal IPR009048; Alpha-macroglobulin, receptor-binding IPR011625; Alpha-2-macroglobulin, N-terminal 2 IPR011626; A-macroglobulin complement component IPR018933; Netrin module, non-TIMP type IPR019565; Alpha-2-macroglobulin, thiol-ester bond-forming	GO:0004866; endopeptidase inhibitor activity; Molecular Function GO:0005515; protein binding; Molecular Function GO:0005576; extracellular region; Cellular Component GO:0005615; extracellular space; Cellular Component	NA	Complement C3 (Fragment)	Complement component C3
chr5	Lcro_GLEAN_10004551	17101634	17121506	0.996619	-	IPR000020; Anaphylatoxin/fibulin IPR001134; Netrin domain IPR001599; Alpha-2-macroglobulin IPR002890; Alpha-2-macroglobulin, N-terminal IPR009048; Alpha-macroglobulin, receptor-binding IPR011625; Alpha-2-macroglobulin, N-terminal 2 IPR011626; A-macroglobulin complement component IPR018933; Netrin module, non-TIMP type IPR019565; Alpha-2-macroglobulin, thiol-ester bond-forming	GO:0004866; endopeptidase inhibitor activity; Molecular Function GO:0005515; protein binding; Molecular Function GO:0005576; extracellular region; Cellular Component GO:0005615; extracellular space; Cellular Component	NA	Complement C3 (Fragment)	Complement component c3
chr5	Lcro_GLEAN_10004557	17255914	17256582	0.999986	-	IPR004031; PMP-22/EMP/MP20/Claudin IPR006187; Claudin	GO:0005198; structural molecule activity; Molecular Function GO:0005923; tight junction; Cellular Component GO:0016020; membrane; Cellular Component	NA	Claudin-6	Uncharacterized protein
chr5	Lcro_GLEAN_10004567	17339305	17352367	0.497225	+	IPR003596; Immunoglobulin V-set, subgroup IPR003599; Immunoglobulin subtype IPR013106; Immunoglobulin V-set	NA	K13073 PIGR; polymeric immunoglobulin receptor K13073 Organismal Systems; Immune System; Intestinal immune network for IgA production [PATH:ko04672]	Polymeric immunoglobulin receptor	Uncharacterized protein
chr5	Lcro_GLEAN_10004568	17354924	17358641	0.498812	+	IPR003599; Immunoglobulin subtype IPR013106; Immunoglobulin V-set	NA	NA	Polymeric immunoglobulin receptor	Uncharacterized protein
chr5	Lcro_GLEAN_10004689	17462157	17488048	0.380804	-	IPR001683; Phox homologous domain IPR002108; Actin-binding, cofilin/tropomyosin type IPR015404; Vps5 C-terminal IPR017904; ADF/Cofilin/Destrin	GO:0003779; actin binding; Molecular Function GO:0005515; protein binding; Molecular Function GO:0005622; intracellular; Cellular Component GO:0007154; cell communication; Biological Process GO:0035091; phosphatidylinositol binding; Molecular Function	NA	Sorting nexin-6	Uncharacterized protein
chr5	Lcro_GLEAN_10004694	17543129	17550698	0.497747	+	IPR000742; Epidermal growth factor-like, type 3 IPR001304; C-type lectin IPR001881; EGF-like calcium-binding IPR013091; EGF calcium-binding	GO:0005488; binding; Molecular Function GO:0005509; calcium ion binding; Molecular Function GO:0005515; protein binding; Molecular Function	NA	Complement component C1q receptor	CD93
chr5	Lcro_GLEAN_10005143	18098749	18123820	0.332744	+	IPR001134; Netrin domain IPR001599; Alpha-2-macroglobulin IPR002890; Alpha-2-macroglobulin, N-terminal IPR009048; Alpha-macroglobulin, receptor-binding IPR011625; Alpha-2-macroglobulin, N-terminal 2 IPR011626; A-macroglobulin complement component IPR018933; Netrin module, non-TIMP type IPR019565; Alpha-2-macroglobulin, thiol-ester bond-forming	GO:0004866; endopeptidase inhibitor activity; Molecular Function GO:0005515; protein binding; Molecular Function GO:0005576; extracellular region; Cellular Component GO:0005615; extracellular space; Cellular Component	NA	Complement C3 (Fragment)	Complement component c3-2
chr5	Lcro_GLEAN_10015663	18868986	18875734	1	+	IPR013568; SEFIR	NA	K05164 IL17R; interleukin 17 receptor K05164 Environmental Information Processing; Signaling Molecules and Interaction; Cytokine-cytokine receptor interaction [PATH:ko04060]	Interleukin-17 receptor A	Interleukin-17 receptor (Precursor)
chr5	Lcro_GLEAN_10015671	19094731	19115082	0.934705	-	IPR001134; Netrin domain IPR015526; Frizzled-related IPR018933; Netrin module, non-TIMP type	GO:0005515; protein binding; Molecular Function	NA	Secreted frizzled-related protein 3	Uncharacterized protein
chr5	Lcro_GLEAN_10015686	19553065	19561392	0.999999	-	IPR000731; Sterol-sensing domain IPR002202; Hydroxymethylglutaryl-CoA reductase, class I/II	GO:0004420; hydroxymethylglutaryl-CoA reductase (NADPH) activity; Molecular Function GO:0015936; coenzyme A metabolic process; Biological Process GO:0016021; integral to membrane; Cellular Component GO:0050662; coenzyme binding; Molecular Function GO:0055114; oxidation-reduction process; Biological Process	K00021 E1.1.1.34; hydroxymethylglutaryl-CoA reductase (NADPH) [EC:1.1.1.34] [EC:1.1.1.34] Metabolism; Metabolism of Terpenoids and Polyketides; Prenyltransferases [BR:ko01006] Metabolism; Metabolism of Terpenoids and Polyketides; Terpenoid backbone biosynthesis [PATH:ko00900] Organismal Systems; Digestive System; Bile secretion [PATH:ko04976]	3-hydroxy-3-methylglutaryl-coenzyme A reductase	HMG-CoA reductase
chr5	Lcro_GLEAN_10019784	20073602	20169446	0.887109	-	IPR000225; Armadillo	GO:0005515; protein binding; Molecular Function	NA	Catenin delta-2	Uncharacterized protein (Fragment)
chr5	Lcro_GLEAN_10019802	20816961	20824004	0.999329	+	IPR001870; B302/SPRY domain IPR003590; Leucine-rich repeat, ribonuclease inhibitor subtype IPR003877; SPla/RYanodine receptor SPRY IPR003879; Butyrophylin-like IPR004020; Pyrin IPR006574; SPRY-associated IPR007111; NACHT nucleoside triphosphatase IPR018355; SPla/RYanodine receptor subgroup	GO:0005515; protein binding; Molecular Function	NA	Protein NLRC3	NOD-like receptor C
chr5	Lcro_GLEAN_10019804	20837810	20848045	0.724593	-	IPR000980; SH2 motif IPR001496; SOCS protein, C-terminal	GO:0005515; protein binding; Molecular Function GO:0035556; intracellular signal transduction; Biological Process	NA	Suppressor of cytokine signaling 7	Uncharacterized protein (Fragment)
chr5	Lcro_GLEAN_10019809	20883551	20886689	0.998486	-	IPR000315; Zinc finger, B-box IPR001841; Zinc finger, RING-type IPR001870; B302/SPRY domain IPR003877; SPla/RYanodine receptor SPRY IPR003879; Butyrophylin-like IPR006574; SPRY-associated IPR018355; SPla/RYanodine receptor subgroup IPR018957; Zinc finger, C3HC4 RING-type	GO:0005515; protein binding; Molecular Function GO:0005622; intracellular; Cellular Component GO:0008270; zinc ion binding; Molecular Function	NA	E3 ubiquitin/ISG15 ligase TRIM25	Uncharacterized protein (Fragment)
chr5	Lcro_GLEAN_10020216	22451476	22476988	0.978935	+	IPR000159; Ras-association IPR000980; SH2 motif IPR003123; Vacuolar sorting protein 9 IPR013995; Vacuolar sorting protein 9, subgroup	GO:0005515; protein binding; Molecular Function GO:0007165; signal transduction; Biological Process	NA	Ras and Rab interactor 2	Chromosome 18 SCAF14786, whole genome shotgun sequence. (Fragment)
chr5	Lcro_GLEAN_10020217	22481516	22505050	0.995938	+	IPR001611; Leucine-rich repeat IPR003590; Leucine-rich repeat, ribonuclease inhibitor subtype IPR006553; Leucine-rich repeat, cysteine-containing subtype IPR007111; NACHT nucleoside triphosphatase	GO:0005515; protein binding; Molecular Function	NA	NACHT, LRR and PYD domains-containing protein 14	Uncharacterized protein
chr5	Lcro_GLEAN_10016807	23474230	23539647	1	+	IPR006844; Magnesium transporter protein 1 IPR013766; Thioredoxin domain IPR021149; Oligosaccharyl transferase complex, subunit OST3/OST6	GO:0045454; cell redox homeostasis; Biological Process	K12669 OST3, OST6; oligosaccharyltransferase complex subunit gamma K12669 Metabolism; Glycan Biosynthesis and Metabolism; Glycosyltransferases [BR:ko01003] Metabolism; Glycan Biosynthesis and Metabolism; N-Glycan biosynthesis [PATH:ko00510] Metabolism; Glycan Biosynthesis and Metabolism; Various types of N-glycan biosynthesis [PATH:ko00513] Genetic Information Processing; Folding, Sorting and Deg…	Tumor suppressor candidate 3	Uncharacterized protein
chr5	Lcro_GLEAN_10016812	23645434	23648214	0.60726	+	IPR000315; Zinc finger, B-box IPR001841; Zinc finger, RING-type IPR001870; B302/SPRY domain IPR003877; SPla/RYanodine receptor SPRY IPR003879; Butyrophylin-like IPR006574; SPRY-associated IPR018355; SPla/RYanodine receptor subgroup	GO:0005515; protein binding; Molecular Function GO:0005622; intracellular; Cellular Component GO:0008270; zinc ion binding; Molecular Function	NA	Tripartite motif-containing protein 16	Uncharacterized protein
chr5	Lcro_GLEAN_10016824	23910367	23915769	0.999273	+	IPR001073; Complement C1q protein	NA	NA	Complement C1q-like protein 2	C1q-like adipose specific protein
chr5	Lcro_GLEAN_10016823	23889114	24014649	0.816108	-	IPR000008; C2 calcium-dependent membrane targeting IPR000719; Protein kinase, catalytic domain IPR000961; AGC-kinase, C-terminal IPR002219; Protein kinase C-like, phorbol ester/diacylglycerol binding IPR002290; Serine/threonine-protein kinase domain IPR017442; Serine/threonine-protein kinase-like domain IPR017892; Protein kinase, C-terminal IPR018029; C2 membrane targeting protein IPR020454; Diac…	GO:0004672; protein kinase activity; Molecular Function GO:0004674; protein serine/threonine kinase activity; Molecular Function GO:0005515; protein binding; Molecular Function GO:0005524; ATP binding; Molecular Function GO:0006468; protein phosphorylation; Biological Process GO:0035556; intracellular signal transduction; Biological Process	K02677 CPKC; classical protein kinase C [EC:2.7.11.13] [EC:2.7.11.13] Environmental Information Processing; Signal Transduction; Two-component system [BR:ko02022] Environmental Information Processing; Signal Transduction; MAPK signaling pathway [PATH:ko04010] Environmental Information Processing; Signal Transduction; MAPK signaling pathway - yeast [PATH:ko04011] Environmental Information Processi…	Protein kinase C alpha type	Uncharacterized protein
chr5	Lcro_GLEAN_10016835	24211099	24217393	0.633876	-	IPR001304; C-type lectin IPR002353; Type II antifreeze protein	GO:0005488; binding; Molecular Function GO:0005529; sugar binding; Molecular Function	K10060	C-type lectin domain family 4 member M	C-type lectin A
chr5	Lcro_GLEAN_10016836	24220454	24221063	0.750822	-	IPR001304; C-type lectin IPR002353; Type II antifreeze protein	GO:0005488; binding; Molecular Function GO:0005529; sugar binding; Molecular Function	NA	CD209 antigen-like protein A	CD209 (Fragment)
chr5	Lcro_GLEAN_10016837	24231996	24236267	1	-	IPR001304; C-type lectin IPR002353; Type II antifreeze protein	GO:0005488; binding; Molecular Function GO:0005529; sugar binding; Molecular Function	NA	CD209 antigen-like protein A	Uncharacterized protein (Fragment)
chr5	Lcro_GLEAN_10016853	24335512	24335967	0.998683	+	IPR008115; Septin 7	GO:0005525; GTP binding; Molecular Function GO:0007049; cell cycle; Biological Process	NA	Septin-7	Uncharacterized protein
chr5	Lcro_GLEAN_10002520	24377344	24378882	0.998463	+	IPR000315; Zinc finger, B-box IPR001841; Zinc finger, RING-type IPR001870; B302/SPRY domain IPR003877; SPla/RYanodine receptor SPRY IPR003879; Butyrophylin-like IPR006574; SPRY-associated IPR018355; SPla/RYanodine receptor subgroup IPR018957; Zinc finger, C3HC4 RING-type	GO:0005515; protein binding; Molecular Function GO:0005622; intracellular; Cellular Component GO:0008270; zinc ion binding; Molecular Function	NA	Tripartite motif-containing protein 39	Bloodthirsty
chr5	Lcro_GLEAN_10002521	24383622	24385109	0.80464	+	IPR000315; Zinc finger, B-box IPR001870; B302/SPRY domain IPR003877; SPla/RYanodine receptor SPRY IPR003879; Butyrophylin-like IPR006574; SPRY-associated IPR018355; SPla/RYanodine receptor subgroup	GO:0005515; protein binding; Molecular Function GO:0005622; intracellular; Cellular Component GO:0008270; zinc ion binding; Molecular Function	NA	Tripartite motif-containing protein 39	Bloodthirsty
chr5	Lcro_GLEAN_10002531	24497481	24579322	0.638021	-	IPR001680; WD40 repeat IPR013258; Striatin, N-terminal IPR017986; WD40-repeat-containing domain IPR019781; WD40 repeat, subgroup IPR019782; WD40 repeat 2 IPR020472; G-protein beta WD-40 repeat IPR020617; Thiolase, C-terminal	GO:0005515; protein binding; Molecular Function GO:0008152; metabolic process; Biological Process GO:0016747; transferase activity, transferring acyl groups other than amino-acyl groups; Molecular Function	NA	Striatin	Uncharacterized protein
chr6	Lcro_GLEAN_10004013	243944	249043	0.999999	+	IPR001464; Annexin IPR002392; Annexin, type V IPR015473; Annexin V IPR018502; Annexin repeat	GO:0005509; calcium ion binding; Molecular Function GO:0005544; calcium-dependent phospholipid binding; Molecular Function GO:0050819; negative regulation of coagulation; Biological Process	K16646	Annexin A5	Uncharacterized protein (Fragment)
chr6	Lcro_GLEAN_10020243	552118	553203	0.999261	+	IPR001766; Transcription factor, fork head	GO:0003700; sequence-specific DNA binding transcription factor activity; Molecular Function GO:0006355; regulation of transcription, DNA-dependent; Biological Process GO:0043565; sequence-specific DNA binding; Molecular Function	K09398	Forkhead box protein E1	Forkhead box E1
chr6	Lcro_GLEAN_10020280	1761037	1803261	0.724053	+	IPR000198; Rho GTPase-activating protein domain IPR001452; Src homology-3 domain IPR001849; Pleckstrin homology domain	GO:0005515; protein binding; Molecular Function GO:0005622; intracellular; Cellular Component GO:0007165; signal transduction; Biological Process	K13736 ARHGAP10; Rho GTPase-activating protein 10 K13736 Human Diseases; Infectious Diseases; Bacterial invasion of epithelial cells [PATH:ko05100]	Rho GTPase-activating protein 10	Uncharacterized protein
chr6	Lcro_GLEAN_10008283	2776996	2781329	1	+	NA	NA	K05072 IL7R; interleukin 7 receptor K05072 Environmental Information Processing; Signal Transduction; Jak-STAT signaling pathway [PATH:ko04630] Environmental Information Processing; Signaling Molecules and Interaction; Cytokine-cytokine receptor interaction [PATH:ko04060] Organismal Systems; Immune System; Hematopoietic cell lineage [PATH:ko04640] Human Diseases; Immune Diseases; Primary immunode…	Interleukin-7 receptor subunit alpha	Uncharacterized protein (Fragment)
chr6	Lcro_GLEAN_10008291	2982609	2986959	1	+	IPR001309; Peptidase C14, ICE, catalytic subunit p20 IPR002138; Peptidase C14, caspase non-catalytic subunit p10 IPR002398; Peptidase C14, caspase precursor p45 IPR011600; Peptidase C14, caspase catalytic IPR015470; Caspase-3 IPR015917; Peptidase C14, caspase precursor p45, core	GO:0004197; cysteine-type endopeptidase activity; Molecular Function GO:0005737; cytoplasm; Cellular Component GO:0006508; proteolysis; Biological Process GO:0006915; apoptosis; Biological Process GO:0008234; cysteine-type peptidase activity; Molecular Function	K02187 CASP3; caspase 3 [EC:3.4.22.56] [EC:3.4.22.56] Environmental Information Processing; Signal Transduction; Two-component system [BR:ko02022] Environmental Information Processing; Signal Transduction; MAPK signaling pathway [PATH:ko04010] Cellular Processes; Cell Growth and Death; Apoptosis [PATH:ko04210] Cellular Processes; Cell Growth and Death; p53 signaling pathway [PATH:ko04115] Organis…	Caspase-3	Caspase-3
chr6	Lcro_GLEAN_10019410	3144690	3145620	0.60701	+	NA	NA	NA	Interferon-induced protein 44	Uncharacterized protein (Fragment)
chr6	Lcro_GLEAN_10019411	3147514	3149606	1	+	NA	NA	NA	Interferon-induced protein 44	Uncharacterized protein
chr6	Lcro_GLEAN_10019412	3151287	3153851	0.999911	+	NA	NA	NA	Interferon-induced protein 44	Uncharacterized protein
chr6	Lcro_GLEAN_10019415	3288109	3290383	0.999521	-	IPR001134; Netrin domain IPR002223; Proteinase inhibitor I2, Kunitz metazoa IPR003598; Immunoglobulin subtype 2 IPR003599; Immunoglobulin subtype IPR007110; Immunoglobulin-like IPR008197; Whey acidic protein, 4-disulphide core IPR011497; Protease inhibitor, Kazal-type IPR013098; Immunoglobulin I-set IPR018933; Netrin module, non-TIMP type	GO:0004867; serine-type endopeptidase inhibitor activity; Molecular Function GO:0005515; protein binding; Molecular Function GO:0005576; extracellular region; Cellular Component GO:0030414; peptidase inhibitor activity; Molecular Function	NA	WAP, kazal, immunoglobulin, kunitz and NTR domain-containing protein 2	Uncharacterized protein
chr6	Lcro_GLEAN_10019431	3756054	3756626	1	-	IPR008653; Immediate early response	NA	NA	Immediate early response gene 2 protein	Uncharacterized protein
chr6	Lcro_GLEAN_10019435	3785476	3799200	0.602596	-	IPR003597; Immunoglobulin C1-set IPR003599; Immunoglobulin subtype IPR007110; Immunoglobulin-like IPR013162; CD80-like, immunoglobulin C2-set	GO:0005515; protein binding; Molecular Function	NA	Ig mu chain C region membrane-bound form	Uncharacterized protein
chr6	Lcro_GLEAN_10019455	4313680	4315856	0.99243	-	IPR000980; SH2 motif IPR001496; SOCS protein, C-terminal	GO:0005515; protein binding; Molecular Function GO:0035556; intracellular signal transduction; Biological Process	NA	Suppressor of cytokine signaling 1	Chromosome 18 SCAF11624, whole genome shotgun sequence
chr6	Lcro_GLEAN_10019456	4333695	4357310	1	+	IPR000008; C2 calcium-dependent membrane targeting IPR000719; Protein kinase, catalytic domain IPR000961; AGC-kinase, C-terminal IPR002219; Protein kinase C-like, phorbol ester/diacylglycerol binding IPR002290; Serine/threonine-protein kinase domain IPR017442; Serine/threonine-protein kinase-like domain IPR017892; Protein kinase, C-terminal IPR018029; C2 membrane targeting protein IPR020454; Diac…	GO:0004672; protein kinase activity; Molecular Function GO:0004674; protein serine/threonine kinase activity; Molecular Function GO:0005515; protein binding; Molecular Function GO:0005524; ATP binding; Molecular Function GO:0006468; protein phosphorylation; Biological Process GO:0035556; intracellular signal transduction; Biological Process	K02677 CPKC; classical protein kinase C [EC:2.7.11.13] [EC:2.7.11.13] Environmental Information Processing; Signal Transduction; Two-component system [BR:ko02022] Environmental Information Processing; Signal Transduction; MAPK signaling pathway [PATH:ko04010] Environmental Information Processing; Signal Transduction; MAPK signaling pathway - yeast [PATH:ko04011] Environmental Information Processi…	Protein kinase C beta type	Uncharacterized protein
chr6	Lcro_GLEAN_10010152	5032700	5036879	0.997653	-	IPR000157; Toll-Interleukin receptor IPR000483; Cysteine-rich flanking region, C-terminal domain IPR001611; Leucine-rich repeat IPR003591; Leucine-rich repeat, typical subtype	GO:0004888; transmembrane receptor activity; Molecular Function GO:0005515; protein binding; Molecular Function GO:0007165; signal transduction; Biological Process GO:0031224; intrinsic to membrane; Cellular Component GO:0045087; innate immune response; Biological Process	K05401 TLR3; toll-like receptor 3 K05401 Organismal Systems; Immune System; Toll-like receptor signaling pathway [PATH:ko04620] Human Diseases; Infectious Diseases; Influenza A [PATH:ko05164] Human Diseases; Infectious Diseases; Hepatitis C [PATH:ko05160] Human Diseases; Infectious Diseases; Herpes simplex infection [PATH:ko05168]	Toll-like receptor 3	Toll-like receptor 3
chr6	Lcro_GLEAN_10010161	5205978	5207330	0.999613	+	IPR001134; Netrin domain IPR015526; Frizzled-related IPR018933; Netrin module, non-TIMP type IPR020067; Frizzled domain	GO:0005515; protein binding; Molecular Function	K02176 SFRP2; secreted frizzled-related protein 2 K02176 Environmental Information Processing; Signal Transduction; Wnt signaling pathway [PATH:ko04310]	Secreted frizzled-related protein 2	Uncharacterized protein
chr6	Lcro_GLEAN_10010162	5207722	5208924	1	+	IPR001134; Netrin domain IPR015526; Frizzled-related IPR018933; Netrin module, non-TIMP type IPR020067; Frizzled domain	GO:0005515; protein binding; Molecular Function	NA	Secreted frizzled-related protein 2	Uncharacterized protein
chr6	Lcro_GLEAN_10010163	5214259	5216473	0.613901	+	NA	NA	NA	TNFAIP3-interacting protein 2	Uncharacterized protein (Fragment)
chr6	Lcro_GLEAN_10010164	5221604	5223127	1	+	IPR022008; TSG101 and ALIX binding domain of CEP55	NA	NA	TNFAIP3-interacting protein 2	Uncharacterized protein (Fragment)
chr6	Lcro_GLEAN_10010172	5398226	5400616	0.994002	+	IPR000157; Toll-Interleukin receptor IPR001611; Leucine-rich repeat IPR003591; Leucine-rich repeat, typical subtype IPR004075; Interleukin-1 receptor, type I/Toll precursor	GO:0004888; transmembrane receptor activity; Molecular Function GO:0005515; protein binding; Molecular Function GO:0007165; signal transduction; Biological Process GO:0031224; intrinsic to membrane; Cellular Component GO:0045087; innate immune response; Biological Process	K10159 TLR2; toll-like receptor 2 K10159 Cellular Processes; Transport and Catabolism; Phagosome [PATH:ko04145] Organismal Systems; Immune System; Toll-like receptor signaling pathway [PATH:ko04620] Human Diseases; Immune Diseases; Rheumatoid arthritis [PATH:ko05323] Human Diseases; Infectious Diseases; Legionellosis [PATH:ko05134] Human Diseases; Infectious Diseases; Tuberculosis [PATH:ko05152] …	Toll-like receptor 2 type-2	Toll-like receptor
chr6	Lcro_GLEAN_10005711	5715841	5732012	0.90051	-	IPR001806; Ras GTPase IPR003577; Ras small GTPase, Ras type IPR003578; Small GTPase, Rho type IPR003579; Ras small GTPase, Rab type IPR013753; Ras	GO:0005525; GTP binding; Molecular Function GO:0005622; intracellular; Cellular Component GO:0007264; small GTPase mediated signal transduction; Biological Process GO:0015031; protein transport; Biological Process	NA	Ras-related C3 botulinum toxin substrate 2	Ras-related C3 botulinum toxin substrate 2
chr6	Lcro_GLEAN_10005710	5708663	5742861	0.661086	+	IPR000904; SEC7-like IPR001254; Peptidase S1/S6, chymotrypsin/Hap IPR001849; Pleckstrin homology domain	GO:0004252; serine-type endopeptidase activity; Molecular Function GO:0005086; ARF guanyl-nucleotide exchange factor activity; Molecular Function GO:0005515; protein binding; Molecular Function GO:0005622; intracellular; Cellular Component GO:0006508; proteolysis; Biological Process GO:0032012; regulation of ARF protein signal transduction; Biological Process	NA	Cytohesin-4	Cytohesin-2
chr6	Lcro_GLEAN_10003477	6026256	6033884	0.999067	+	IPR000342; Regulator of G protein signalling IPR001158; DIX	GO:0004871; signal transducer activity; Molecular Function GO:0005622; intracellular; Cellular Component GO:0007275; multicellular organismal development; Biological Process	NA	Axin-1	Axin 1
chr6	Lcro_GLEAN_10003487	6204882	6211648	1	-	IPR001660; Sterile alpha motif domain IPR001841; Zinc finger, RING-type IPR018957; Zinc finger, C3HC4 RING-type IPR021129; Sterile alpha motif, type 1	GO:0005515; protein binding; Molecular Function GO:0008270; zinc ion binding; Molecular Function	K15684	Bifunctional apoptosis regulator	Uncharacterized protein
chr6	Lcro_GLEAN_10016366	6275532	6311858	0.837901	-	IPR000421; Coagulation factor 5/8 type, C-terminal IPR000742; Epidermal growth factor-like, type 3 IPR001791; Laminin G domain IPR002181; Fibrinogen, alpha/beta/gamma chain, C-terminal globular IPR012680; Laminin G, subdomain 2	GO:0005102; receptor binding; Molecular Function GO:0005515; protein binding; Molecular Function GO:0007155; cell adhesion; Biological Process GO:0007165; signal transduction; Biological Process	NA	Contactin-associated protein-like 5	Uncharacterized protein (Fragment)
chr6	Lcro_GLEAN_10016378	6581640	6601247	0.79923	+	IPR001440; Tetratricopeptide TPR-1 IPR006597; Sel1-like IPR013026; Tetratricopeptide repeat-containing IPR019734; Tetratricopeptide repeat	GO:0005515; protein binding; Molecular Function	K16474	Intraflagellar transport protein 88 homolog	Intraflagellar transport protein 88 homolog
chr6	Lcro_GLEAN_10016379	6603147	6603870	1	+	IPR010345; Interleukin-17, metazoa IPR020440; Interleukin-17, chordata	GO:0005125; cytokine activity; Molecular Function GO:0005576; extracellular region; Cellular Component GO:0006954; inflammatory response; Biological Process	K05492	Interleukin-17D	Interleukin-17D
chr6	Lcro_GLEAN_10016383	6798317	6873602	0.854877	-	IPR000315; Zinc finger, B-box IPR000719; Protein kinase, catalytic domain IPR001194; DENN IPR001487; Bromodomain IPR001965; Zinc finger, PHD-type IPR002290; Serine/threonine-protein kinase domain IPR003649; B-box, C-terminal IPR005112; dDENN IPR005113; uDENN IPR017442; Serine/threonine-protein kinase-like domain IPR019787; Zinc finger, PHD-finger IPR020635; Tyrosine-protein kinase, catalytic doma…	GO:0004672; protein kinase activity; Molecular Function GO:0004674; protein serine/threonine kinase activity; Molecular Function GO:0005515; protein binding; Molecular Function GO:0005524; ATP binding; Molecular Function GO:0005622; intracellular; Cellular Component GO:0006468; protein phosphorylation; Biological Process GO:0008270; zinc ion binding; Molecular Function	NA	Suppression of tumorigenicity 5 protein	Chromosome 5 SCAF14581, whole genome shotgun sequence
chr6	Lcro_GLEAN_10016396	7154554	7163477	0.998049	-	IPR001315; Caspase Recruitment IPR001841; Zinc finger, RING-type IPR003590; Leucine-rich repeat, ribonuclease inhibitor subtype IPR007111; NACHT nucleoside triphosphatase	GO:0005515; protein binding; Molecular Function GO:0005622; intracellular; Cellular Component GO:0008270; zinc ion binding; Molecular Function GO:0042981; regulation of apoptosis; Biological Process	NA	Protein NLRC3	Uncharacterized protein
chr6	Lcro_GLEAN_10016397	7171401	7177807	0.998103	-	IPR001611; Leucine-rich repeat IPR003590; Leucine-rich repeat, ribonuclease inhibitor subtype	GO:0005515; protein binding; Molecular Function	NA	NACHT, LRR and PYD domains-containing protein 1	Uncharacterized protein (Fragment)
chr6	Lcro_GLEAN_10016398	7183238	7185873	1	-	IPR001315; Caspase Recruitment IPR002398; Peptidase C14, caspase precursor p45	GO:0004197; cysteine-type endopeptidase activity; Molecular Function GO:0005515; protein binding; Molecular Function GO:0005622; intracellular; Cellular Component GO:0006508; proteolysis; Biological Process GO:0042981; regulation of apoptosis; Biological Process	NA	Caspase recruitment domain-containing protein 16	Guanylate binding protein 3
chr6	Lcro_GLEAN_10004176	7595940	7613534	0.982899	-	IPR003378; Fringe-like	GO:0016020; membrane; Cellular Component GO:0016757; transferase activity, transferring glycosyl groups; Molecular Function	K05948 FNG; fringe [EC:2.4.1.222] [EC:2.4.1.222] Metabolism; Glycan Biosynthesis and Metabolism; Other types of O-glycan biosynthesis [PATH:ko00514] Environmental Information Processing; Signal Transduction; Notch signaling pathway [PATH:ko04330]	Beta-1,3-N-acetylglucosaminyltransferase manic fringe	Uncharacterized protein
chr6	Lcro_GLEAN_10004177	7619880	7630669	0.999763	+	IPR001841; Zinc finger, RING-type IPR001870; B302/SPRY domain IPR003877; SPla/RYanodine receptor SPRY IPR003879; Butyrophylin-like IPR006574; SPRY-associated IPR018355; SPla/RYanodine receptor subgroup IPR018957; Zinc finger, C3HC4 RING-type	GO:0005515; protein binding; Molecular Function GO:0008270; zinc ion binding; Molecular Function	NA	Tripartite motif-containing protein 16	Uncharacterized protein (Fragment)
chr6	Lcro_GLEAN_10004182	7709650	7710210	0.999749	+	IPR008653; Immediate early response	NA	NA	Immediate early response gene 2 protein	Uncharacterized protein
chr6	Lcro_GLEAN_10018542	9029544	9039236	1	+	IPR000253; Forkhead-associated (FHA) domain IPR001766; Transcription factor, fork head	GO:0003700; sequence-specific DNA binding transcription factor activity; Molecular Function GO:0005515; protein binding; Molecular Function GO:0006355; regulation of transcription, DNA-dependent; Biological Process GO:0043565; sequence-specific DNA binding; Molecular Function	K09404	Forkhead box protein K1	Uncharacterized protein
chr6	Lcro_GLEAN_10008761	10048650	10055547	0.9969	-	IPR001254; Peptidase S1/S6, chymotrypsin/Hap IPR001314; Peptidase S1A, chymotrypsin-type	GO:0004252; serine-type endopeptidase activity; Molecular Function GO:0006508; proteolysis; Biological Process	NA	Suppressor of tumorigenicity 14 protein homolog	Trypsin
chr6	Lcro_GLEAN_10008765	10164515	10172378	1	-	IPR001806; Ras GTPase IPR003577; Ras small GTPase, Ras type IPR003578; Small GTPase, Rho type IPR003579; Ras small GTPase, Rab type IPR013753; Ras IPR020851; Small GTPase	GO:0005525; GTP binding; Molecular Function GO:0005622; intracellular; Cellular Component GO:0007264; small GTPase mediated signal transduction; Biological Process GO:0015031; protein transport; Biological Process	K07934	Intraflagellar transport protein 27 homolog	Uncharacterized protein
chr6	Lcro_GLEAN_10008768	10202593	10223142	1	+	IPR001932; Protein phosphatase 2C-like IPR014045; Protein phosphatase 2C, N-terminal IPR015655; Protein phosphatase 2C	GO:0003824; catalytic activity; Molecular Function	K04403 MAP3K7IP1, TAB1; TAK1-binding protein 1 K04403 Environmental Information Processing; Signal Transduction; Two-component system [BR:ko02022] Environmental Information Processing; Signal Transduction; MAPK signaling pathway [PATH:ko04010] Organismal Systems; Immune System; Toll-like receptor signaling pathway [PATH:ko04620] Organismal Systems; Immune System; NOD-like receptor signaling pathw…	TGF-beta-activated kinase 1 and MAP3K7-binding protein 1	Uncharacterized protein
chr6	Lcro_GLEAN_10008771	10335345	10342584	0.495981	-	IPR001073; Complement C1q protein IPR008160; Collagen triple helix repeat	NA	NA	Complement C1q tumor necrosis factor-related protein 1	Uncharacterized protein (Fragment)
chr6	Lcro_GLEAN_10008776	10424447	10432134	0.654758	+	IPR003598; Immunoglobulin subtype 2 IPR003599; Immunoglobulin subtype IPR007110; Immunoglobulin-like IPR013106; Immunoglobulin V-set IPR013151; Immunoglobulin	GO:0005515; protein binding; Molecular Function	NA	Contactin-1	Chromosome 18 SCAF15100, whole genome shotgun sequence
chr6	Lcro_GLEAN_10008778	10438403	10450599	0.991182	+	IPR000246; Peptidase T2, asparaginase 2 IPR001310; Histidine triad (HIT) protein IPR003599; Immunoglobulin subtype IPR007110; Immunoglobulin-like IPR013151; Immunoglobulin	GO:0005515; protein binding; Molecular Function GO:0016787; hydrolase activity; Molecular Function	NA	B-cell receptor CD22	Chromosome 18 SCAF15100, whole genome shotgun sequence
chr6	Lcro_GLEAN_10017000	10978863	10979631	0.998012	+	IPR000980; SH2 motif IPR001496; SOCS protein, C-terminal	GO:0005515; protein binding; Molecular Function GO:0035556; intracellular signal transduction; Biological Process	NA	Suppressor of cytokine signaling 3	Uncharacterized protein (Fragment)
chr6	Lcro_GLEAN_10017011	11113866	11188888	0.994858	-	IPR013543; Calcium/calmodulin-dependent protein kinase II, association-domain	GO:0004683; calmodulin-dependent protein kinase activity; Molecular Function GO:0005516; calmodulin binding; Molecular Function GO:0006468; protein phosphorylation; Biological Process	NA	Calcium/calmodulin-dependent protein kinase type II subunit gamma	Calcium/calmodulin-dependent protein kinase type II gamma chain
chr6	Lcro_GLEAN_10017030	11587018	11588154	1	+	IPR000276; GPCR, rhodopsin-like, 7TM IPR017452; GPCR, rhodopsin-like superfamily	GO:0007186; G-protein coupled receptor protein signaling pathway; Biological Process GO:0016021; integral to membrane; Cellular Component	NA	C-X-C chemokine receptor type 6	Uncharacterized protein (Fragment)
chr6	Lcro_GLEAN_10018617	12292701	12306481	0.981471	-	IPR000980; SH2 motif IPR001496; SOCS protein, C-terminal	GO:0005515; protein binding; Molecular Function GO:0035556; intracellular signal transduction; Biological Process	K04699 SOCS7, NAP4; suppressor of cytokine signaling 7 K04699 Environmental Information Processing; Signal Transduction; Jak-STAT signaling pathway [PATH:ko04630]	Suppressor of cytokine signaling 7	Suppressor of cytokine signaling 7
chr6	Lcro_GLEAN_10018630	13059117	13064531	0.999912	-	IPR009652; Protein of unknown function DUF1241	NA	NA	Programmed cell death protein 10	Uncharacterized protein (Fragment)
chr6	Lcro_GLEAN_10011916	13980871	13983541	0.933107	-	IPR001304; C-type lectin IPR002353; Type II antifreeze protein	GO:0005488; binding; Molecular Function GO:0005529; sugar binding; Molecular Function	NA	C-type lectin domain family 4 member M	C-type lectin domain family 4 member E
chr6	Lcro_GLEAN_10005720	14558362	14559090	0.998847	-	IPR001304; C-type lectin	GO:0005488; binding; Molecular Function	NA	Lymphocyte antigen 75	Uncharacterized protein (Fragment)
chr6	Lcro_GLEAN_10005725	14661290	14686510	0.575589	+	IPR000971; Globin, subset IPR013314; Globin, lamprey/hagfish type	GO:0005506; iron ion binding; Molecular Function GO:0015671; oxygen transport; Biological Process GO:0019825; oxygen binding; Molecular Function GO:0020037; heme binding; Molecular Function	NA	Cytoglobin-2	Uncharacterized protein
chr6	Lcro_GLEAN_10005736	14872766	14875605	0.429694	+	IPR001304; C-type lectin	GO:0005488; binding; Molecular Function	NA	C-type lectin domain family 4 member F	C-type lectin A
chr6	Lcro_GLEAN_10005737	14880294	14882778	0.969739	+	IPR001304; C-type lectin	GO:0005488; binding; Molecular Function	NA	C-type lectin domain family 4 member F	CD209 antigen-like protein A
chr6	Lcro_GLEAN_10005739	14897792	14900588	0.966966	-	IPR001304; C-type lectin IPR002353; Type II antifreeze protein	GO:0005488; binding; Molecular Function GO:0005529; sugar binding; Molecular Function	NA	Collectin-12	Uncharacterized protein
chr6	Lcro_GLEAN_10005738	14888155	14911458	0.711625	+	IPR001304; C-type lectin	GO:0005488; binding; Molecular Function	NA	C-type lectin domain family 4 member F	C-type lectin A
chr6	Lcro_GLEAN_10003223	15071455	15073332	0.99934	-	IPR004827; Basic-leucine zipper (bZIP) transcription factor IPR011700; Basic leucine zipper	GO:0003700; sequence-specific DNA binding transcription factor activity; Molecular Function GO:0006355; regulation of transcription, DNA-dependent; Biological Process GO:0043565; sequence-specific DNA binding; Molecular Function GO:0046983; protein dimerization activity; Molecular Function	NA	Nuclear factor interleukin-3-regulated protein	Uncharacterized protein (Fragment)
chr6	Lcro_GLEAN_10003224	15083191	15096887	0.468165	-	IPR004827; Basic-leucine zipper (bZIP) transcription factor IPR007087; Zinc finger, C2H2-type IPR011700; Basic leucine zipper IPR015880; Zinc finger, C2H2-like	GO:0003700; sequence-specific DNA binding transcription factor activity; Molecular Function GO:0005622; intracellular; Cellular Component GO:0006355; regulation of transcription, DNA-dependent; Biological Process GO:0008270; zinc ion binding; Molecular Function GO:0043565; sequence-specific DNA binding; Molecular Function GO:0046983; protein dimerization activity; Molecular Function	K09467	Krueppel-like factor 4	Uncharacterized protein (Fragment)
chr6	Lcro_GLEAN_10003230	15138436	15148082	0.823761	-	IPR000719; Protein kinase, catalytic domain IPR002290; Serine/threonine-protein kinase domain IPR017442; Serine/threonine-protein kinase-like domain IPR020635; Tyrosine-protein kinase, catalytic domain	GO:0004672; protein kinase activity; Molecular Function GO:0004674; protein serine/threonine kinase activity; Molecular Function GO:0005524; ATP binding; Molecular Function GO:0006468; protein phosphorylation; Biological Process	NA	MAP kinase-activated protein kinase 3	Uncharacterized protein
chr6	Lcro_GLEAN_10001514	16241391	16247763	0.995827	+	IPR001304; C-type lectin IPR002353; Type II antifreeze protein IPR003597; Immunoglobulin C1-set IPR007110; Immunoglobulin-like	GO:0005488; binding; Molecular Function GO:0005515; protein binding; Molecular Function GO:0005529; sugar binding; Molecular Function	NA	Ig kappa chain C region	Uncharacterized protein (Fragment)
chr6	Lcro_GLEAN_10003498	16715939	16720892	0.992069	+	IPR003598; Immunoglobulin subtype 2 IPR003599; Immunoglobulin subtype IPR007110; Immunoglobulin-like IPR013106; Immunoglobulin V-set IPR013151; Immunoglobulin	GO:0005515; protein binding; Molecular Function	NA	B-cell receptor CD22	Uncharacterized protein (Fragment)
chr6	Lcro_GLEAN_10001228	17049951	17054022	0.999993	-	IPR003593; ATPase, AAA+ type, core IPR003959; ATPase, AAA-type, core IPR015163; CDC6, C-terminal	GO:0000166; nucleotide binding; Molecular Function GO:0005524; ATP binding; Molecular Function GO:0017111; nucleoside-triphosphatase activity; Molecular Function	K02213 CDC6; cell division control protein 6 K02213 Cellular Processes; Cell Growth and Death; Cell cycle [PATH:ko04110] Cellular Processes; Cell Growth and Death; Cell cycle - yeast [PATH:ko04111] Cellular Processes; Cell Growth and Death; Meiosis - yeast [PATH:ko04113]	Cell division control protein 6 homolog	Uncharacterized protein (Fragment)
chr6	Lcro_GLEAN_10009257	17522151	17526315	1	+	IPR001079; Galectin, carbohydrate recognition domain	GO:0005529; sugar binding; Molecular Function	NA	Galectin-related protein	Galectin-related protein
chr6	Lcro_GLEAN_10009261	17579377	17581014	0.999761	-	IPR000315; Zinc finger, B-box IPR001841; Zinc finger, RING-type IPR001870; B302/SPRY domain IPR003877; SPla/RYanodine receptor SPRY IPR003879; Butyrophylin-like IPR006574; SPRY-associated IPR018355; SPla/RYanodine receptor subgroup IPR018957; Zinc finger, C3HC4 RING-type	GO:0005515; protein binding; Molecular Function GO:0005622; intracellular; Cellular Component GO:0008270; zinc ion binding; Molecular Function	NA	Tripartite motif-containing protein 39	Bloodthirsty
chr6	Lcro_GLEAN_10009269	17731748	17733418	0.999242	+	IPR000315; Zinc finger, B-box IPR001841; Zinc finger, RING-type IPR001870; B302/SPRY domain IPR003877; SPla/RYanodine receptor SPRY IPR003879; Butyrophylin-like IPR006574; SPRY-associated IPR018355; SPla/RYanodine receptor subgroup IPR018957; Zinc finger, C3HC4 RING-type	GO:0005515; protein binding; Molecular Function GO:0005622; intracellular; Cellular Component GO:0008270; zinc ion binding; Molecular Function	K12015	Tripartite motif-containing protein 39	Bloodthirsty
chr7	Lcro_GLEAN_10025715	948890	960301	1	-	IPR003596; Immunoglobulin V-set, subgroup IPR003599; Immunoglobulin subtype IPR007110; Immunoglobulin-like IPR007111; NACHT nucleoside triphosphatase IPR013106; Immunoglobulin V-set	GO:0005515; protein binding; Molecular Function	NA	Programmed cell death 1 ligand 1	B7-H1/DC
chr7	Lcro_GLEAN_10025725	1155405	1158627	0.996296	+	IPR000157; Toll-Interleukin receptor IPR000483; Cysteine-rich flanking region, C-terminal domain IPR001611; Leucine-rich repeat IPR003591; Leucine-rich repeat, typical subtype	GO:0004888; transmembrane receptor activity; Molecular Function GO:0005515; protein binding; Molecular Function GO:0007165; signal transduction; Biological Process GO:0031224; intrinsic to membrane; Cellular Component GO:0045087; innate immune response; Biological Process	K10161 TLR9; toll-like receptor 9 K10161 Organismal Systems; Immune System; Toll-like receptor signaling pathway [PATH:ko04620] Human Diseases; Infectious Diseases; Tuberculosis [PATH:ko05152] Human Diseases; Infectious Diseases; Measles [PATH:ko05162] Human Diseases; Infectious Diseases; Herpes simplex infection [PATH:ko05168] Human Diseases; Infectious Diseases; Malaria [PATH:ko05144] Human Dis…	Toll-like receptor 9	Toll-like receptor 9 isoform A
chr7	Lcro_GLEAN_10025746	1912684	1945977	0.496268	-	IPR007087; Zinc finger, C2H2-type IPR015880; Zinc finger, C2H2-like	GO:0005622; intracellular; Cellular Component GO:0008270; zinc ion binding; Molecular Function	NA	B-cell lymphoma/leukemia 11A	Uncharacterized protein
chr7	Lcro_GLEAN_10025751	2004457	2011572	0.68372	-	IPR001134; Netrin domain IPR001496; SOCS protein, C-terminal IPR001806; Ras GTPase IPR002041; Ran GTPase IPR002223; Proteinase inhibitor I2, Kunitz metazoa IPR003577; Ras small GTPase, Ras type IPR003578; Small GTPase, Rho type IPR003579; Ras small GTPase, Rab type IPR003598; Immunoglobulin subtype 2 IPR003599; Immunoglobulin subtype IPR007110; Immunoglobulin-like IPR011497; Protease inhibitor, K…	GO:0003924; GTPase activity; Molecular Function GO:0004867; serine-type endopeptidase inhibitor activity; Molecular Function GO:0005515; protein binding; Molecular Function GO:0005525; GTP binding; Molecular Function GO:0005622; intracellular; Cellular Component GO:0006886; intracellular protein transport; Biological Process GO:0006913; nucleocytoplasmic transport; Biological Process GO:0007165; …	NA	WAP, kazal, immunoglobulin, kunitz and NTR domain-containing protein	Uncharacterized protein (Fragment)
chr7	Lcro_GLEAN_10025778	2421754	2432821	1	-	IPR002691; LIM binding protein	GO:0003712; transcription cofactor activity; Molecular Function GO:0005634; nucleus; Cellular Component GO:0007275; multicellular organismal development; Biological Process	K15617 LDB1; LIM domain-binding protein 1 K15617 Human Diseases; Cancers; Transcriptional misregulation in cancers [PATH:ko05202]	LIM domain-binding protein 1	Uncharacterized protein (Fragment)
chr7	Lcro_GLEAN_10025783	2494127	2506156	1	-	IPR003598; Immunoglobulin subtype 2 IPR003599; Immunoglobulin subtype IPR007110; Immunoglobulin-like IPR013151; Immunoglobulin	GO:0005515; protein binding; Molecular Function	NA	Fc receptor-like protein 5	Uncharacterized protein
chr7	Lcro_GLEAN_10025798	2692100	2696676	0.232823	+	IPR001190; Speract/scavenger receptor IPR001507; Zona pellucida sperm-binding protein IPR001881; EGF-like calcium-binding IPR013091; EGF calcium-binding IPR017448; Speract/scavenger receptor-related	GO:0005044; scavenger receptor activity; Molecular Function GO:0005509; calcium ion binding; Molecular Function GO:0016020; membrane; Cellular Component	NA	Deleted in malignant brain tumors 1 protein	Uncharacterized protein
chr7	Lcro_GLEAN_10025804	2904300	2908061	1	-	IPR003596; Immunoglobulin V-set, subgroup IPR003599; Immunoglobulin subtype IPR007110; Immunoglobulin-like IPR013106; Immunoglobulin V-set	GO:0005515; protein binding; Molecular Function	NA	Ig-like V-type domain-containing protein FAM187A	Uncharacterized protein (Fragment)
chr7	Lcro_GLEAN_10025800	2702441	2913110	0.0593623	+	IPR001190; Speract/scavenger receptor IPR001222; Zinc finger, TFIIS-type IPR001507; Zona pellucida sperm-binding protein IPR003617; Transcription elongation factor, TFIIS/CRSP70, N-terminal, sub-type IPR003618; Transcription elongation factor S-II, central domain IPR017448; Speract/scavenger receptor-related IPR017890; Transcription elongation factor S-IIM IPR017923; Transcription factor IIS, N-t…	GO:0003676; nucleic acid binding; Molecular Function GO:0003677; DNA binding; Molecular Function GO:0005044; scavenger receptor activity; Molecular Function GO:0005634; nucleus; Cellular Component GO:0006350; transcription; Biological Process GO:0008270; zinc ion binding; Molecular Function GO:0016020; membrane; Cellular Component GO:0030528; transcription regulator activity; Molecular Function G…	K03145	Deleted in malignant brain tumors 1 protein	Uncharacterized protein
chr7	Lcro_GLEAN_10022252	3095311	3108045	1	+	IPR001206; Diacylglycerol kinase, catalytic domain	GO:0004143; diacylglycerol kinase activity; Molecular Function GO:0007205; activation of protein kinase C activity by G-protein coupled receptor protein signaling pathway; Biological Process	K04715 E2.7.1.138, CERK; ceramide kinase [EC:2.7.1.138] [EC:2.7.1.138] Metabolism; Lipid Metabolism; Sphingolipid metabolism [PATH:ko00600]	Ceramide kinase	Uncharacterized protein
chr7	Lcro_GLEAN_10022253	3118313	3139302	0.9957	+	IPR002126; Cadherin	GO:0005509; calcium ion binding; Molecular Function GO:0007156; homophilic cell adhesion; Biological Process GO:0016020; membrane; Cellular Component	NA	Cadherin-related family member 5	Uncharacterized protein (Fragment)
chr7	Lcro_GLEAN_10022265	3278740	3282573	1	-	IPR007856; Saposin-like type B, 1 IPR008139; Saposin B	GO:0006629; lipid metabolic process; Biological Process	NA	Antimicrobial peptide NK-lysin	Uncharacterized protein
chr7	Lcro_GLEAN_10022291	3818904	3823206	1	+	IPR015373; Interferon alpha/beta receptor, beta chain	NA	K05136 IL20RA; interleukin 20 receptor alpha K05136 Environmental Information Processing; Signal Transduction; Jak-STAT signaling pathway [PATH:ko04630] Environmental Information Processing; Signaling Molecules and Interaction; Cytokine-cytokine receptor interaction [PATH:ko04060]	Interleukin-20 receptor subunit alpha	Uncharacterized protein
chr7	Lcro_GLEAN_10022293	3852848	3853913	1	+	IPR001811; Chemokine interleukin-8-like domain	GO:0005576; extracellular region; Cellular Component GO:0006955; immune response; Biological Process GO:0008009; chemokine activity; Molecular Function	NA	C-C motif chemokine 3	C-C motif chemokine 14
chr7	Lcro_GLEAN_10022324	4617567	4649102	0.994091	-	IPR001404; Heat shock protein Hsp90 IPR002554; Protein phosphatase 2A, regulatory B subunit, B56 IPR003594; ATPase-like, ATP-binding domain IPR020575; Heat shock protein Hsp90, N-terminal	GO:0000159; protein phosphatase type 2A complex; Cellular Component GO:0005524; ATP binding; Molecular Function GO:0006457; protein folding; Biological Process GO:0006950; response to stress; Biological Process GO:0007165; signal transduction; Biological Process GO:0008601; protein phosphatase type 2A regulator activity; Molecular Function GO:0051082; unfolded protein binding; Molecular Function	K11584 PPP2R5; protein phosphatase 2 (formerly 2A), regulatory subunit B' K11584 Genetic Information Processing; Translation; mRNA surveillance pathway [PATH:ko03015] Environmental Information Processing; Signal Transduction; Wnt signaling pathway [PATH:ko04310] Cellular Processes; Cell Growth and Death; Meiosis - yeast [PATH:ko04113] Cellular Processes; Cell Growth and Death; Oocyte meiosis [PAT…	Heat shock protein HSP 90-alpha	Uncharacterized protein
chr7	Lcro_GLEAN_10022325	4649754	4654160	1	-	IPR001404; Heat shock protein Hsp90 IPR003594; ATPase-like, ATP-binding domain IPR020575; Heat shock protein Hsp90, N-terminal	GO:0005524; ATP binding; Molecular Function GO:0006457; protein folding; Biological Process GO:0006950; response to stress; Biological Process GO:0051082; unfolded protein binding; Molecular Function	K04079 htpG, HSP90A; molecular chaperone HtpG K04079 Genetic Information Processing; Folding, Sorting and Degradation; Protein processing in endoplasmic reticulum [PATH:ko04141] Organismal Systems; Immune System; NOD-like receptor signaling pathway [PATH:ko04621] Organismal Systems; Immune System; Antigen processing and presentation [PATH:ko04612] Organismal Systems; Endocrine System; Progesteron…	Heat shock protein HSP 90-alpha 1	Cytosolic heat shock protein 90-alpha
chr7	Lcro_GLEAN_10022333	5050024	5050551	0.999703	+	IPR003579; Ras small GTPase, Rab type IPR006687; Small GTPase SAR1-type IPR006688; ADP-ribosylation factor IPR006689; ARF/SAR superfamily	GO:0005525; GTP binding; Molecular Function GO:0005622; intracellular; Cellular Component GO:0006886; intracellular protein transport; Biological Process GO:0007264; small GTPase mediated signal transduction; Biological Process GO:0015031; protein transport; Biological Process	K07941 ARF6; ADP-ribosylation factor 6 K07941 Cellular Processes; Transport and Catabolism; Endocytosis [PATH:ko04144] Organismal Systems; Immune System; Fc gamma R-mediated phagocytosis [PATH:ko04666]	ADP-ribosylation factor 6	Uncharacterized protein
chr7	Lcro_GLEAN_10012831	6686220	6788452	0.930782	+	IPR001452; Src homology-3 domain IPR010703; Dedicator of cytokinesis	GO:0005085; guanyl-nucleotide exchange factor activity; Molecular Function GO:0005515; protein binding; Molecular Function GO:0005525; GTP binding; Molecular Function GO:0051020; GTPase binding; Molecular Function	K12367 DOCK2; dedicator of cytokinesis 2 K12367 Organismal Systems; Immune System; Fc gamma R-mediated phagocytosis [PATH:ko04666] Organismal Systems; Immune System; Chemokine signaling pathway [PATH:ko04062]	Dedicator of cytokinesis protein 2	Uncharacterized protein
chr7	Lcro_GLEAN_10012845	7113753	7114270	0.713078	+	IPR003596; Immunoglobulin V-set, subgroup IPR003599; Immunoglobulin subtype IPR007110; Immunoglobulin-like IPR013106; Immunoglobulin V-set	GO:0005515; protein binding; Molecular Function	NA	Ig kappa chain V-III region MOPC 63	Uncharacterized protein (Fragment)
chr7	Lcro_GLEAN_10009166	7227554	7232691	0.999956	-	IPR006052; Tumour necrosis factor	GO:0005164; tumor necrosis factor receptor binding; Molecular Function GO:0006955; immune response; Biological Process GO:0016020; membrane; Cellular Component	K04721 TNFSF10, TRAIL; tumor necrosis factor ligand superfamily member 10 K04721 Environmental Information Processing; Signaling Molecules and Interaction; Cytokine-cytokine receptor interaction [PATH:ko04060] Cellular Processes; Cell Growth and Death; Apoptosis [PATH:ko04210] Organismal Systems; Immune System; Natural killer cell mediated cytotoxicity [PATH:ko04650] Human Diseases; Infectious Di…	Tumor necrosis factor ligand superfamily member 10	TNF-related apoptosis inducing ligand
chr7	Lcro_GLEAN_10009173	7434796	7450722	0.99998	+	IPR001683; Phox homologous domain IPR001736; Phospholipase D/Transphosphatidylase IPR001849; Pleckstrin homology domain IPR015679; Phospholipase D	GO:0003824; catalytic activity; Molecular Function GO:0005515; protein binding; Molecular Function GO:0007154; cell communication; Biological Process GO:0008152; metabolic process; Biological Process GO:0035091; phosphatidylinositol binding; Molecular Function	K01115 E3.1.4.4, PLD; phospholipase D [EC:3.1.4.4] [EC:3.1.4.4] Metabolism; Lipid Metabolism; Glycerophospholipid metabolism [PATH:ko00564] Metabolism; Lipid Metabolism; Ether lipid metabolism [PATH:ko00565] Cellular Processes; Transport and Catabolism; Endocytosis [PATH:ko04144] Organismal Systems; Immune System; Fc gamma R-mediated phagocytosis [PATH:ko04666] Organismal Systems; Endocrine Syste…	Phospholipase D1	Phospholipase D
chr7	Lcro_GLEAN_10009178	7579821	7582497	1	-	IPR003555; Claudin-11 IPR004031; PMP-22/EMP/MP20/Claudin IPR006187; Claudin	GO:0005198; structural molecule activity; Molecular Function GO:0005923; tight junction; Cellular Component GO:0016020; membrane; Cellular Component	K06087 CLDN; claudin K06087 Environmental Information Processing; Signaling Molecules and Interaction; Cell adhesion molecules (CAMs) [PATH:ko04514] Cellular Processes; Cell Communication; Tight junction [PATH:ko04530] Organismal Systems; Immune System; Leukocyte transendothelial migration [PATH:ko04670] Human Diseases; Infectious Diseases; Hepatitis C [PATH:ko05160]	Claudin-11	Uncharacterized protein
chr7	Lcro_GLEAN_10010181	7805310	7811297	0.330521	-	IPR001611; Leucine-rich repeat IPR003590; Leucine-rich repeat, ribonuclease inhibitor subtype IPR007111; NACHT nucleoside triphosphatase	GO:0005515; protein binding; Molecular Function	NA	Protein NLRC3	Uncharacterized protein
chr7	Lcro_GLEAN_10010190	7889706	7954610	0.798906	-	NA	NA	NA	Ciliary neurotrophic factor receptor subunit alpha	Uncharacterized protein (Fragment)
chr7	Lcro_GLEAN_10010205	8316186	8317427	1	+	IPR008253; Marvel	GO:0016020; membrane; Cellular Component	NA	Chemokine-like factor	Chemokine-like factor (Fragment)
chr7	Lcro_GLEAN_10010206	8318020	8322886	1	+	IPR008253; Marvel IPR021128; MARVEL-like domain	GO:0016020; membrane; Cellular Component	NA	CKLF-like MARVEL transmembrane domain-containing protein 3	Uncharacterized protein
chr7	Lcro_GLEAN_10010207	8327332	8341354	1	-	IPR008253; Marvel IPR021128; MARVEL-like domain	GO:0016020; membrane; Cellular Component	NA	CKLF-like MARVEL transmembrane domain-containing protein 4	Uncharacterized protein
chr7	Lcro_GLEAN_10010212	8423807	8454060	0.999847	-	IPR002126; Cadherin	GO:0005509; calcium ion binding; Molecular Function GO:0007156; homophilic cell adhesion; Biological Process GO:0016020; membrane; Cellular Component	K06810	Cadherin-16	Uncharacterized protein (Fragment)
chr7	Lcro_GLEAN_10019011	8692843	8818413	0.898315	-	NA	NA	NA	Transferrin receptor protein 1	Uncharacterized protein
chr7	Lcro_GLEAN_10019019	9191085	9192633	0.778987	-	IPR001304; C-type lectin	GO:0005488; binding; Molecular Function	NA	C-type lectin domain family 17, member A	C-type lectin domain family 4 member E
chr7	Lcro_GLEAN_10019020	9194070	9204444	0.776564	-	IPR001304; C-type lectin IPR008160; Collagen triple helix repeat	GO:0005488; binding; Molecular Function	K10065	Collectin-10	Uncharacterized protein (Fragment)
chr7	Lcro_GLEAN_10019023	9270383	9277855	1	+	IPR022078; CD99 antigen-like protein 2	NA	K06520 CD99, MIC2; CD99 antigen K06520 Environmental Information Processing; Signaling Molecules and Interaction; Cell adhesion molecules (CAMs) [PATH:ko04514] Organismal Systems; Immune System; Leukocyte transendothelial migration [PATH:ko04670]	CD99 antigen-like protein 2	Uncharacterized protein (Fragment)
chr7	Lcro_GLEAN_10019037	9640235	9641902	0.995999	+	IPR000315; Zinc finger, B-box IPR001841; Zinc finger, RING-type IPR001870; B302/SPRY domain IPR003877; SPla/RYanodine receptor SPRY IPR003879; Butyrophylin-like IPR006574; SPRY-associated IPR018355; SPla/RYanodine receptor subgroup IPR018957; Zinc finger, C3HC4 RING-type	GO:0005515; protein binding; Molecular Function GO:0005622; intracellular; Cellular Component GO:0008270; zinc ion binding; Molecular Function	NA	Tripartite motif-containing protein 16	Uncharacterized protein (Fragment)
chr7	Lcro_GLEAN_10019050	9890194	9897619	0.994758	+	IPR003597; Immunoglobulin C1-set IPR007110; Immunoglobulin-like	GO:0005515; protein binding; Molecular Function	NA	Ig lambda chain C region	Uncharacterized protein
chr7	Lcro_GLEAN_10019055	9956993	9961759	0.999999	-	IPR006571; TLDc	NA	NA	Interferon-induced protein 44	Uncharacterized protein
chr7	Lcro_GLEAN_10019060	9996494	10017542	0.995181	+	IPR003961; Fibronectin, type III IPR006623; Testicular haploid expressed repeat	GO:0005515; protein binding; Molecular Function	NA	Interleukin-6 receptor subunit beta	Novel protein
chr7	Lcro_GLEAN_10019068	10116321	10117320	0.727172	+	IPR009652; Protein of unknown function DUF1241	NA	NA	Programmed cell death protein 10	Chromosome 10 SCAF15019, whole genome shotgun sequence. (Fragment)
chr7	Lcro_GLEAN_10007858	10163360	10168217	0.662233	+	IPR001611; Leucine-rich repeat IPR001870; B302/SPRY domain IPR003590; Leucine-rich repeat, ribonuclease inhibitor subtype IPR003877; SPla/RYanodine receptor SPRY IPR003879; Butyrophylin-like IPR004020; Pyrin IPR006574; SPRY-associated IPR007111; NACHT nucleoside triphosphatase IPR018355; SPla/RYanodine receptor subgroup	GO:0005515; protein binding; Molecular Function	NA	NACHT, LRR and PYD domains-containing protein 3	Si:dkey-41c6.3
chr7	Lcro_GLEAN_10007886	10598307	10624066	0.818704	-	IPR001111; Transforming growth factor-beta, N-terminal IPR001839; Transforming growth factor-beta, C-terminal IPR002405; Inhibin, alpha subunit IPR015615; Transforming growth factor-beta-related	GO:0005576; extracellular region; Cellular Component GO:0008083; growth factor activity; Molecular Function GO:0040007; growth; Biological Process	K04662 BMP2_4; bone morphogenetic protein 2/4 K04662 Environmental Information Processing; Signal Transduction; Hedgehog signaling pathway [PATH:ko04340] Environmental Information Processing; Signal Transduction; TGF-beta signaling pathway [PATH:ko04350] Environmental Information Processing; Signaling Molecules and Interaction; Cytokine-cytokine receptor interaction [PATH:ko04060] Human Diseases;…	Bone morphogenetic protein 4	Bmp4 protein
chr7	Lcro_GLEAN_10010056	11709065	11711250	1	-	IPR000668; Peptidase C1A, papain C-terminal IPR013128; Peptidase C1A, papain IPR013201; Proteinase inhibitor I29, cathepsin propeptide	GO:0006508; proteolysis; Biological Process GO:0008234; cysteine-type peptidase activity; Molecular Function	NA	Cathepsin L	Cathepsin L
chr7	Lcro_GLEAN_10010065	11943598	11944335	0.999261	-	IPR004031; PMP-22/EMP/MP20/Claudin IPR006187; Claudin	GO:0005198; structural molecule activity; Molecular Function GO:0005923; tight junction; Cellular Component GO:0016020; membrane; Cellular Component	NA	Claudin-23	Chromosome 10 SCAF15019, whole genome shotgun sequence
chr7	Lcro_GLEAN_10015415	12112589	12113092	1	+	IPR003596; Immunoglobulin V-set, subgroup IPR007110; Immunoglobulin-like IPR013106; Immunoglobulin V-set	GO:0005515; protein binding; Molecular Function	NA	Ig kappa chain V region 3368	Uncharacterized protein (Fragment)
chr7	Lcro_GLEAN_10015418	12132577	12137508	0.999429	+	IPR009652; Protein of unknown function DUF1241	NA	NA	Programmed cell death protein 10	Uncharacterized protein
chr7	Lcro_GLEAN_10015423	12267049	12270050	0.999242	+	NA	NA	NA	Rab GTPase-activating protein 1	Uncharacterized protein
chr7	Lcro_GLEAN_10015424	12270691	12273191	1	+	IPR003961; Fibronectin, type III	GO:0005515; protein binding; Molecular Function	NA	Interleukin-27 subunit beta	Uncharacterized protein (Fragment)
chr7	Lcro_GLEAN_10015425	12273572	12295476	0.999928	-	IPR003961; Fibronectin, type III IPR007110; Immunoglobulin-like IPR010457; Immunoglobulin C2-set-like, ligand-binding IPR010736; Protein of unknown function DUF1309 IPR015152; Growth hormone/erythropoietin receptor, ligand binding	GO:0005515; protein binding; Molecular Function	NA	Cytokine receptor-like factor 1	Uncharacterized protein (Fragment)
chr7	Lcro_GLEAN_10015445	13063287	13065042	0.999966	-	IPR001304; C-type lectin IPR008160; Collagen triple helix repeat	GO:0005488; binding; Molecular Function	K10066 COLEC11; collectin sub-family member 11 K10066 Cellular Processes; Transport and Catabolism; Phagosome [PATH:ko04145]	Collectin-11	Uncharacterized protein
chr7	Lcro_GLEAN_10015448	13142049	13143182	0.999761	-	IPR000276; GPCR, rhodopsin-like, 7TM IPR002147; 5-Hydroxytryptamine 1B receptor IPR002231; 5-Hydroxytryptamine receptor IPR017452; GPCR, rhodopsin-like superfamily	GO:0007186; G-protein coupled receptor protein signaling pathway; Biological Process GO:0016021; integral to membrane; Cellular Component	K04153 HTR1; 5-hydroxytryptamine receptor 1 K04153 Environmental Information Processing; Signaling Molecules and Interaction; G protein-coupled receptors [BR:ko04030] Environmental Information Processing; Signaling Molecules and Interaction; Enzyme-linked receptors [BR:ko01020] Environmental Information Processing; Signaling Molecules and Interaction; Cytokine receptors [BR:ko04050] Environmental…	5-hydroxytryptamine receptor 1B	Uncharacterized protein (Fragment)
chr7	Lcro_GLEAN_10015449	13155844	13163054	0.999999	+	IPR004843; Metallo-dependent phosphatase IPR006179; 5'-Nucleotidase/apyrase IPR008334; 5'-Nucleotidase, C-terminal	GO:0009166; nucleotide catabolic process; Biological Process GO:0016787; hydrolase activity; Molecular Function	K01081 E3.1.3.5; 5'-nucleotidase [EC:3.1.3.5] [EC:3.1.3.5] Metabolism; Nucleotide Metabolism; Purine metabolism [PATH:ko00230] Metabolism; Nucleotide Metabolism; Pyrimidine metabolism [PATH:ko00240] Metabolism; Metabolism of Cofactors and Vitamins; Nicotinate and nicotinamide metabolism [PATH:ko00760]	5'-nucleotidase	Uncharacterized protein (Fragment)
chr7	Lcro_GLEAN_10015453	13218264	13221291	0.934482	-	NA	NA	NA	Akirin-2	C6orf166
chr7	Lcro_GLEAN_10010837	13695650	13705641	1	+	IPR000436; Sushi/SCR/CCP IPR000884; Thrombospondin, type 1 repeat IPR001862; Membrane attack complex component/perforin/complement C9 IPR002172; Low-density lipoprotein (LDL) receptor class A repeat IPR003884; Factor I / membrane attack complex IPR020864; Membrane attack complex component/perforin (MACPF) domain	GO:0005515; protein binding; Molecular Function GO:0005579; membrane attack complex; Cellular Component GO:0006955; immune response; Biological Process	K03995 C6; complement component 6 K03995 Organismal Systems; Immune System; Complement and coagulation cascades [PATH:ko04610] Human Diseases; Immune Diseases; Systemic lupus erythematosus [PATH:ko05322] Human Diseases; Neurodegenerative Diseases; Prion diseases [PATH:ko05020]	Complement component C6	Uncharacterized protein
chr7	Lcro_GLEAN_10010838	13707144	13753506	1	-	IPR000436; Sushi/SCR/CCP IPR000884; Thrombospondin, type 1 repeat IPR001862; Membrane attack complex component/perforin/complement C9 IPR002172; Low-density lipoprotein (LDL) receptor class A repeat IPR003884; Factor I / membrane attack complex IPR020864; Membrane attack complex component/perforin (MACPF) domain	GO:0005515; protein binding; Molecular Function GO:0005579; membrane attack complex; Cellular Component GO:0006955; immune response; Biological Process	K03996 C7; complement component 7 K03996 Organismal Systems; Immune System; Complement and coagulation cascades [PATH:ko04610] Human Diseases; Immune Diseases; Systemic lupus erythematosus [PATH:ko05322] Human Diseases; Neurodegenerative Diseases; Prion diseases [PATH:ko05020]	Complement component C7	Uncharacterized protein (Fragment)
chr7	Lcro_GLEAN_10010849	13978873	13982061	0.995955	+	IPR004031; PMP-22/EMP/MP20/Claudin IPR006187; Claudin	GO:0005198; structural molecule activity; Molecular Function GO:0005923; tight junction; Cellular Component GO:0016020; membrane; Cellular Component	K06087 CLDN; claudin K06087 Environmental Information Processing; Signaling Molecules and Interaction; Cell adhesion molecules (CAMs) [PATH:ko04514] Cellular Processes; Cell Communication; Tight junction [PATH:ko04530] Organismal Systems; Immune System; Leukocyte transendothelial migration [PATH:ko04670] Human Diseases; Infectious Diseases; Hepatitis C [PATH:ko05160]	Claudin-15	Uncharacterized protein
chr7	Lcro_GLEAN_10010430	14359758	14373900	0.295191	+	IPR001599; Alpha-2-macroglobulin IPR002890; Alpha-2-macroglobulin, N-terminal IPR009048; Alpha-macroglobulin, receptor-binding IPR011626; A-macroglobulin complement component IPR019565; Alpha-2-macroglobulin, thiol-ester bond-forming	GO:0004866; endopeptidase inhibitor activity; Molecular Function GO:0005576; extracellular region; Cellular Component GO:0005615; extracellular space; Cellular Component	NA	CD109 antigen	Uncharacterized protein (Fragment)
chr7	Lcro_GLEAN_10010435	14559627	14560358	0.999982	-	IPR003556; Claudin-14 IPR004031; PMP-22/EMP/MP20/Claudin IPR006187; Claudin	GO:0005198; structural molecule activity; Molecular Function GO:0005923; tight junction; Cellular Component GO:0016020; membrane; Cellular Component	K06087 CLDN; claudin K06087 Environmental Information Processing; Signaling Molecules and Interaction; Cell adhesion molecules (CAMs) [PATH:ko04514] Cellular Processes; Cell Communication; Tight junction [PATH:ko04530] Organismal Systems; Immune System; Leukocyte transendothelial migration [PATH:ko04670] Human Diseases; Infectious Diseases; Hepatitis C [PATH:ko05160]	Claudin-20	Uncharacterized protein
chr7	Lcro_GLEAN_10001796	14892190	14898378	0.588267	+	NA	NA	NA	Bcl-2-modifying factor	Chromosome undetermined SCAF14006, whole genome shotgun sequence. (Fragment)
chr7	Lcro_GLEAN_10007942	15102412	15105555	1	+	IPR022773; Siva	NA	NA	Apoptosis regulatory protein Siva	Uncharacterized protein
chr7	Lcro_GLEAN_10007977	15521009	15525521	0.999692	-	IPR009311; Interferon-induced 6-16	GO:0016021; integral to membrane; Cellular Component	NA	Interferon alpha-inducible protein 27, mitochondrial	Interferon alpha-inducible protein 27
chr7	Lcro_GLEAN_10007978	15529802	15532040	1	-	IPR009311; Interferon-induced 6-16	GO:0016021; integral to membrane; Cellular Component	NA	Interferon alpha-inducible protein 27-like protein 2	Uncharacterized protein (Fragment)
chr7	Lcro_GLEAN_10007979	15531988	15537591	0.999566	+	IPR001079; Galectin, carbohydrate recognition domain	GO:0005529; sugar binding; Molecular Function	NA	Galectin-8	Uncharacterized protein (Fragment)
chr7	Lcro_GLEAN_10010935	16246467	16248050	0.983203	+	IPR000742; Epidermal growth factor-like, type 3 IPR001304; C-type lectin IPR001881; EGF-like calcium-binding IPR006210; Epidermal growth factor-like IPR013091; EGF calcium-binding	GO:0005488; binding; Molecular Function GO:0005509; calcium ion binding; Molecular Function GO:0005515; protein binding; Molecular Function	K06702	Complement component C1q receptor	Uncharacterized protein (Fragment)
chr7	Lcro_GLEAN_10010941	16360590	16397488	0.16611	-	IPR001452; Src homology-3 domain IPR002110; Ankyrin repeat IPR020683; Ankyrin repeat-containing domain	GO:0005515; protein binding; Molecular Function	NA	Apoptosis-stimulating of p53 protein 1	Uncharacterized protein (Fragment)
chr7	Lcro_GLEAN_10001878	16999392	17000610	0.999359	+	IPR007743; Interferon-inducible GTPase	GO:0005525; GTP binding; Molecular Function GO:0016020; membrane; Cellular Component GO:0016817; hydrolase activity, acting on acid anhydrides; Molecular Function	NA	Interferon-inducible GTPase 5	Chromosome undetermined SCAF9979, whole genome shotgun sequence. (Fragment)
chr7	Lcro_GLEAN_10001880	17004697	17010199	0.596081	-	IPR007743; Interferon-inducible GTPase IPR010505; Molybdenum cofactor synthesis C-terminal	GO:0005525; GTP binding; Molecular Function GO:0006777; Mo-molybdopterin cofactor biosynthetic process; Biological Process GO:0016020; membrane; Cellular Component GO:0016817; hydrolase activity, acting on acid anhydrides; Molecular Function GO:0019008; molybdopterin synthase complex; Cellular Component GO:0051539; 4 iron, 4 sulfur cluster binding; Molecular Function	NA	Interferon-inducible GTPase 5	Uncharacterized protein (Fragment)
chr7	Lcro_GLEAN_10012399	17291682	17298225	0.999761	-	IPR000315; Zinc finger, B-box IPR001870; B302/SPRY domain IPR003877; SPla/RYanodine receptor SPRY IPR003879; Butyrophylin-like IPR006574; SPRY-associated IPR018355; SPla/RYanodine receptor subgroup	GO:0005515; protein binding; Molecular Function GO:0005622; intracellular; Cellular Component GO:0008270; zinc ion binding; Molecular Function	NA	Tripartite motif-containing protein 35	Tripartite motif-containing protein 35
chr7	Lcro_GLEAN_10012419	18102839	18110180	0.999987	-	IPR000859; CUB IPR001212; Somatomedin B domain IPR001507; Zona pellucida sperm-binding protein IPR017976; Endoglin/CD105 antigen subgroup	GO:0005044; scavenger receptor activity; Molecular Function GO:0006955; immune response; Biological Process GO:0030247; polysaccharide binding; Molecular Function	NA	Deleted in malignant brain tumors 1 protein	Uncharacterized protein (Fragment)
chr7	Lcro_GLEAN_10006795	19853909	19855913	0.980889	-	IPR001400; Somatotropin hormone	GO:0005179; hormone activity; Molecular Function GO:0005576; extracellular region; Cellular Component	K05439 PRL; prolactin K05439 Environmental Information Processing; Signal Transduction; Jak-STAT signaling pathway [PATH:ko04630] Environmental Information Processing; Signaling Molecules and Interaction; G protein-coupled receptors [BR:ko04030] Environmental Information Processing; Signaling Molecules and Interaction; Enzyme-linked receptors [BR:ko01020] Environmental Information Processing; Sig…	Prolactin	Prolactin 2
chr7	Lcro_GLEAN_10006796	19857329	19858567	0.991802	-	IPR001134; Netrin domain IPR015526; Frizzled-related IPR020067; Frizzled domain	GO:0005515; protein binding; Molecular Function	NA	Secreted frizzled-related protein 5	Chromosome 13 SCAF15000, whole genome shotgun sequence
chr7	Lcro_GLEAN_10006801	20001251	20004332	0.600647	-	IPR001611; Leucine-rich repeat IPR003591; Leucine-rich repeat, typical subtype IPR003598; Immunoglobulin subtype 2 IPR003599; Immunoglobulin subtype IPR007110; Immunoglobulin-like IPR013098; Immunoglobulin I-set	GO:0005515; protein binding; Molecular Function	NA	Leucine-rich repeat, immunoglobulin-like domain and transmembrane domain-containing protein 3	Chromosome undetermined SCAF14551, whole genome shotgun sequence. (Fragment)
chr7	Lcro_GLEAN_10006806	20084877	20092628	0.999242	+	IPR000719; Protein kinase, catalytic domain IPR001245; Serine-threonine/tyrosine-protein kinase IPR002290; Serine/threonine-protein kinase domain IPR020635; Tyrosine-protein kinase, catalytic domain	GO:0004672; protein kinase activity; Molecular Function GO:0004674; protein serine/threonine kinase activity; Molecular Function GO:0005524; ATP binding; Molecular Function GO:0006468; protein phosphorylation; Biological Process	K04427 MAP3K7, TAK1; mitogen-activated protein kinase kinase kinase 7 [EC:2.7.11.25] [EC:2.7.11.25] Environmental Information Processing; Signal Transduction; Two-component system [BR:ko02022] Environmental Information Processing; Signal Transduction; MAPK signaling pathway [PATH:ko04010] Environmental Information Processing; Signal Transduction; Wnt signaling pathway [PATH:ko04310] Cellular Proc…	Mitogen-activated protein kinase kinase kinase 7	Uncharacterized protein (Fragment)
chr7	Lcro_GLEAN_10017226	20399966	20401804	1	+	IPR001611; Leucine-rich repeat IPR003591; Leucine-rich repeat, typical subtype IPR003598; Immunoglobulin subtype 2 IPR003599; Immunoglobulin subtype IPR007110; Immunoglobulin-like IPR013098; Immunoglobulin I-set	GO:0005515; protein binding; Molecular Function	NA	Leucine-rich repeat and immunoglobulin-like domain-containing nogo receptor-interacting protein 2	Uncharacterized protein
chr7	Lcro_GLEAN_10017242	21093431	21127378	1	+	IPR001111; Transforming growth factor-beta, N-terminal IPR001839; Transforming growth factor-beta, C-terminal IPR003940; Transforming growth factor, beta 2 IPR015615; Transforming growth factor-beta-related IPR016319; Transforming growth factor-beta	GO:0005160; transforming growth factor beta receptor binding; Molecular Function GO:0005615; extracellular space; Cellular Component GO:0008083; growth factor activity; Molecular Function GO:0016049; cell growth; Biological Process GO:0040007; growth; Biological Process	K13376 TGFB2; transforming growth factor beta-2 K13376 Environmental Information Processing; Signal Transduction; Two-component system [BR:ko02022] Environmental Information Processing; Signal Transduction; MAPK signaling pathway [PATH:ko04010] Environmental Information Processing; Signal Transduction; TGF-beta signaling pathway [PATH:ko04350] Environmental Information Processing; Signaling Molec…	Transforming growth factor beta-2	Uncharacterized protein
chr7	Lcro_GLEAN_10014344	21773054	21809012	0.999128	+	IPR000261; EPS15 homology (EH) IPR001401; Dynamin, GTPase domain IPR018249; EF-HAND 2	GO:0003924; GTPase activity; Molecular Function GO:0005515; protein binding; Molecular Function GO:0005525; GTP binding; Molecular Function	K12477 EHD4; EH domain-containing protein 4 K12477 Cellular Processes; Transport and Catabolism; Endocytosis [PATH:ko04144]	EH domain-containing protein 4	Uncharacterized protein
chr7	Lcro_GLEAN_10014347	21875677	21877002	0.994222	+	IPR001766; Transcription factor, fork head	GO:0003700; sequence-specific DNA binding transcription factor activity; Molecular Function GO:0006355; regulation of transcription, DNA-dependent; Biological Process GO:0043565; sequence-specific DNA binding; Molecular Function	K09385	Forkhead box protein G1	Uncharacterized protein
chr7	Lcro_GLEAN_10008317	22969498	22972492	1	-	IPR002110; Ankyrin repeat IPR020683; Ankyrin repeat-containing domain	GO:0005515; protein binding; Molecular Function	K04734 NFKBIA; NF-kappa-B inhibitor alpha K04734 Cellular Processes; Cell Growth and Death; Apoptosis [PATH:ko04210] Organismal Systems; Immune System; Toll-like receptor signaling pathway [PATH:ko04620] Organismal Systems; Immune System; NOD-like receptor signaling pathway [PATH:ko04621] Organismal Systems; Immune System; RIG-I-like receptor signaling pathway [PATH:ko04622] Organismal Systems; I…	NF-kappa-B inhibitor alpha	Uncharacterized protein
chr7	Lcro_GLEAN_10009328	23419176	23434657	0.998952	-	IPR003123; Vacuolar sorting protein 9 IPR013995; Vacuolar sorting protein 9, subgroup	NA	NA	Ras and Rab interactor 3	Uncharacterized protein (Fragment)
chr7	Lcro_GLEAN_10009334	23549735	23581633	0.73187	+	IPR000008; C2 calcium-dependent membrane targeting IPR018029; C2 membrane targeting protein	GO:0005515; protein binding; Molecular Function	K15291 RIMS1, RIM1; regulating synaptic membrane exocytosis protein 1 K15291 Organismal Systems; Nervous System; Retrograde endocannabinoid signaling [PATH:ko04723] Organismal Systems; Nervous System; Synaptic vesicle cycle [PATH:ko04721]	Regulating synaptic membrane exocytosis protein 2	Uncharacterized protein
chr7	Lcro_GLEAN_10009335	23598761	23599591	0.956632	+	NA	NA	NA	B-cell lymphoma/leukemia 11A	Uncharacterized protein
chr7	Lcro_GLEAN_10009336	23605327	23644243	0.956735	+	IPR007087; Zinc finger, C2H2-type IPR015880; Zinc finger, C2H2-like	GO:0005622; intracellular; Cellular Component GO:0008270; zinc ion binding; Molecular Function	NA	B-cell lymphoma/leukemia 11A	Uncharacterized protein
chr7	Lcro_GLEAN_10015511	24157003	24208482	0.375772	+	IPR007087; Zinc finger, C2H2-type IPR015880; Zinc finger, C2H2-like	GO:0005622; intracellular; Cellular Component GO:0008270; zinc ion binding; Molecular Function	NA	B-cell lymphoma/leukemia 11B	Uncharacterized protein
chr7	Lcro_GLEAN_10015515	24488209	24575019	0.552002	+	IPR003599; Immunoglobulin subtype IPR003656; Zinc finger, BED-type predicted IPR007110; Immunoglobulin-like IPR013106; Immunoglobulin V-set	GO:0003677; DNA binding; Molecular Function GO:0005515; protein binding; Molecular Function	NA	Immunoglobulin superfamily member 6	Uncharacterized protein
chr7	Lcro_GLEAN_10015541	25200788	25202133	1	-	IPR010580; Endoplasmic reticulum, stress-associated Ramp4	NA	NA	Stress-associated endoplasmic reticulum protein 2	Chromosome undetermined SCAF14677, whole genome shotgun sequence
chr7	Lcro_GLEAN_10022870	25787320	25819348	0.788297	-	IPR003439; ABC transporter-like IPR003593; ATPase, AAA+ type, core	GO:0000166; nucleotide binding; Molecular Function GO:0005524; ATP binding; Molecular Function GO:0016887; ATPase activity; Molecular Function GO:0017111; nucleoside-triphosphatase activity; Molecular Function	K05641 ABCA1; ATP-binding cassette, subfamily A (ABC1), member 1 K05641 Environmental Information Processing; Membrane Transport; Transporters [BR:ko02000] Environmental Information Processing; Membrane Transport; Solute carrier family [BR:ko02001] Environmental Information Processing; Membrane Transport; ABC transporters [PATH:ko02010] Organismal Systems; Digestive System; Fat digestion and abso…	ATP-binding cassette sub-family A member 1	Uncharacterized protein
chr7	Lcro_GLEAN_10022913	27245381	27256126	0.999236	+	IPR001140; ABC transporter, transmembrane domain IPR003439; ABC transporter-like IPR003593; ATPase, AAA+ type, core IPR017940; ABC transporter, integral membrane type 1	GO:0000166; nucleotide binding; Molecular Function GO:0005524; ATP binding; Molecular Function GO:0006810; transport; Biological Process GO:0016021; integral to membrane; Cellular Component GO:0016887; ATPase activity; Molecular Function GO:0017111; nucleoside-triphosphatase activity; Molecular Function GO:0042626; ATPase activity, coupled to transmembrane movement of substances; Molecular Functi…	K05656 ABCB9, TAPL; ATP-binding cassette, subfamily B (MDR/TAP), member 9 K05656 Environmental Information Processing; Membrane Transport; Transporters [BR:ko02000] Environmental Information Processing; Membrane Transport; Solute carrier family [BR:ko02001] Environmental Information Processing; Membrane Transport; ABC transporters [PATH:ko02010] Cellular Processes; Transport and Catabolism; Lysos…	ATP-binding cassette sub-family B member 9	Uncharacterized protein (Fragment)
chr7	Lcro_GLEAN_10022922	27618695	27629338	0.999235	-	IPR001140; ABC transporter, transmembrane domain IPR003439; ABC transporter-like IPR003593; ATPase, AAA+ type, core IPR017940; ABC transporter, integral membrane type 1	GO:0000166; nucleotide binding; Molecular Function GO:0005524; ATP binding; Molecular Function GO:0006810; transport; Biological Process GO:0016021; integral to membrane; Cellular Component GO:0016887; ATPase activity; Molecular Function GO:0017111; nucleoside-triphosphatase activity; Molecular Function GO:0042626; ATPase activity, coupled to transmembrane movement of substances; Molecular Functi…	K05656 ABCB9, TAPL; ATP-binding cassette, subfamily B (MDR/TAP), member 9 K05656 Environmental Information Processing; Membrane Transport; Transporters [BR:ko02000] Environmental Information Processing; Membrane Transport; Solute carrier family [BR:ko02001] Environmental Information Processing; Membrane Transport; ABC transporters [PATH:ko02010] Cellular Processes; Transport and Catabolism; Lysos…	ATP-binding cassette sub-family B member 9	Uncharacterized protein (Fragment)
chr7	Lcro_GLEAN_10022925	27660892	27662576	0.3153	-	IPR001368; TNFR/CD27/30/40/95 cysteine-rich region IPR008063; Fas receptor	GO:0004872; receptor activity; Molecular Function GO:0004888; transmembrane receptor activity; Molecular Function GO:0006915; apoptosis; Biological Process GO:0006955; immune response; Biological Process GO:0007165; signal transduction; Biological Process GO:0016020; membrane; Cellular Component	NA	Tumor necrosis factor receptor superfamily member 14	Zgc:153759
chr7	Lcro_GLEAN_10018664	28746506	28749884	1	-	NA	NA	K05075 IL21R; interleukin 21 receptor K05075 Environmental Information Processing; Signal Transduction; Jak-STAT signaling pathway [PATH:ko04630] Environmental Information Processing; Signaling Molecules and Interaction; Cytokine-cytokine receptor interaction [PATH:ko04060]	Interleukin-21 receptor	Interleukin-21 receptor (Fragment)
chr7	Lcro_GLEAN_10018710	29399133	29408261	0.99963	+	IPR000253; Forkhead-associated (FHA) domain IPR012568; K167R	GO:0005515; protein binding; Molecular Function	NA	Antigen KI-67	Mki67 protein
chr8	Lcro_GLEAN_10024857	144230	147081	1	+	IPR001304; C-type lectin	GO:0005488; binding; Molecular Function	NA	C-type lectin domain family 4 member M	Uncharacterized protein (Fragment)
chr8	Lcro_GLEAN_10024858	151225	152282	0.988699	+	IPR001304; C-type lectin	GO:0005488; binding; Molecular Function	NA	C-type lectin domain family 4 member M	Chromosome 10 SCAF15019, whole genome shotgun sequence
chr8	Lcro_GLEAN_10024859	158095	165565	0.962087	+	IPR001304; C-type lectin	GO:0005488; binding; Molecular Function	NA	C-type lectin domain family 4 member M	Uncharacterized protein
chr8	Lcro_GLEAN_10024860	166126	169237	1	+	IPR001304; C-type lectin	GO:0005488; binding; Molecular Function	NA	CD209 antigen	Uncharacterized protein
chr8	Lcro_GLEAN_10024928	1403367	1419602	0.998393	-	IPR001806; Ras GTPase IPR003577; Ras small GTPase, Ras type IPR003578; Small GTPase, Rho type IPR003579; Ras small GTPase, Rab type IPR013753; Ras	GO:0005525; GTP binding; Molecular Function GO:0005622; intracellular; Cellular Component GO:0007264; small GTPase mediated signal transduction; Biological Process GO:0015031; protein transport; Biological Process	K04393 CDC42; cell division control protein 42 K04393 Environmental Information Processing; Signal Transduction; Two-component system [BR:ko02022] Environmental Information Processing; Signal Transduction; MAPK signaling pathway [PATH:ko04010] Environmental Information Processing; Signal Transduction; MAPK signaling pathway - yeast [PATH:ko04011] Environmental Information Processing; Signal Trans…	Cell division control protein 42 homolog	Uncharacterized protein (Fragment)
chr8	Lcro_GLEAN_10024932	1460913	1466932	1	-	IPR001304; C-type lectin IPR002353; Type II antifreeze protein	GO:0005488; binding; Molecular Function GO:0005529; sugar binding; Molecular Function	NA	C-type lectin domain family 4 member M	C-type lectin domain family 4 member E
chr8	Lcro_GLEAN_10024942	1650579	1655155	0.999999	-	IPR000074; Apolipoprotein A1/A4/E	GO:0005576; extracellular region; Cellular Component GO:0006869; lipid transport; Biological Process GO:0008289; lipid binding; Molecular Function GO:0042157; lipoprotein metabolic process; Biological Process	K04524 APOE; apolipoprotein E K04524 Human Diseases; Neurodegenerative Diseases; Alzheimer's disease [PATH:ko05010]	Apolipoprotein Eb	Apolipoprotein E1
chr8	Lcro_GLEAN_10024943	1657208	1658215	1	-	IPR000074; Apolipoprotein A1/A4/E	GO:0005576; extracellular region; Cellular Component GO:0006869; lipid transport; Biological Process GO:0008289; lipid binding; Molecular Function GO:0042157; lipoprotein metabolic process; Biological Process	NA	Apolipoprotein A-IV	Uncharacterized protein (Fragment)
chr8	Lcro_GLEAN_10024944	1660772	1662212	0.999265	+	IPR000074; Apolipoprotein A1/A4/E	GO:0005576; extracellular region; Cellular Component GO:0006869; lipid transport; Biological Process GO:0008289; lipid binding; Molecular Function GO:0042157; lipoprotein metabolic process; Biological Process	NA	Apolipoprotein A-IV	Uncharacterized protein (Fragment)
chr8	Lcro_GLEAN_10024964	1944852	1975194	0.752315	+	IPR002909; Cell surface receptor IPT/TIG IPR008366; Nuclear factor of activated T cells (NFAT) IPR011539; Rel homology IPR015647; Nuclear factor of activated T-cells 1	GO:0003700; sequence-specific DNA binding transcription factor activity; Molecular Function GO:0005515; protein binding; Molecular Function GO:0005634; nucleus; Cellular Component GO:0006355; regulation of transcription, DNA-dependent; Biological Process GO:0045449; regulation of transcription; Biological Process	K04446 NFATC, NFAT; nuclear factor of activated T-cells, cytoplasmic, calcineurin-dependent K04446 Environmental Information Processing; Signal Transduction; Wnt signaling pathway [PATH:ko04310] Environmental Information Processing; Signal Transduction; VEGF signaling pathway [PATH:ko04370] Organismal Systems; Immune System; Natural killer cell mediated cytotoxicity [PATH:ko04650] Organismal Syst…	Nuclear factor of activated T-cells, cytoplasmic 1	Uncharacterized protein
chr8	Lcro_GLEAN_10024970	2052496	2054256	1	-	IPR001039; MHC class I, alpha chain, alpha1/alpha2 IPR003597; Immunoglobulin C1-set IPR007110; Immunoglobulin-like	GO:0005515; protein binding; Molecular Function GO:0006955; immune response; Biological Process GO:0016020; membrane; Cellular Component GO:0019882; antigen processing and presentation; Biological Process GO:0042612; MHC class I protein complex; Cellular Component	NA	Major histocompatibility complex class I-related gene protein	MHC class Ia antigen (Precursor)
chr8	Lcro_GLEAN_10024982	2310706	2311828	0.994182	-	IPR002960; Tumour necrosis factor beta/lymphotoxin alpha IPR006052; Tumour necrosis factor IPR006053; Tumour necrosis factor alpha/beta/c	GO:0005164; tumor necrosis factor receptor binding; Molecular Function GO:0006955; immune response; Biological Process GO:0016020; membrane; Cellular Component	NA	Tumor necrosis factor	Tumor necrosis factor 2
chr8	Lcro_GLEAN_10024983	2313005	2316626	0.990128	-	IPR002960; Tumour necrosis factor beta/lymphotoxin alpha IPR006052; Tumour necrosis factor IPR006053; Tumour necrosis factor alpha/beta/c	GO:0005164; tumor necrosis factor receptor binding; Molecular Function GO:0006955; immune response; Biological Process GO:0016020; membrane; Cellular Component	K03156 TNFA; tumor necrosis factor superfamily, member 2 K03156 Environmental Information Processing; Signal Transduction; Two-component system [BR:ko02022] Environmental Information Processing; Signal Transduction; MAPK signaling pathway [PATH:ko04010] Environmental Information Processing; Signal Transduction; TGF-beta signaling pathway [PATH:ko04350] Environmental Information Processing; Signal…	Tumor necrosis factor	Tumor necrosis factor 2
chr8	Lcro_GLEAN_10024997	2478245	2484022	1	+	IPR000719; Protein kinase, catalytic domain IPR002290; Serine/threonine-protein kinase domain IPR017442; Serine/threonine-protein kinase-like domain IPR020635; Tyrosine-protein kinase, catalytic domain IPR020675; Myosin light chain kinase-related	GO:0004672; protein kinase activity; Molecular Function GO:0004674; protein serine/threonine kinase activity; Molecular Function GO:0005524; ATP binding; Molecular Function GO:0006468; protein phosphorylation; Biological Process	K08803 DAPK; death-associated protein kinase [EC:2.7.11.1] [EC:2.7.11.1] Human Diseases; Cancers; Pathways in cancer [PATH:ko05200] Human Diseases; Cancers; Bladder cancer [PATH:ko05219]	Death-associated protein kinase 2	Uncharacterized protein (Fragment)
chr8	Lcro_GLEAN_10025007	2595564	2602003	0.849122	+	IPR006116; 2-5-oligoadenylate synthetase, N-terminal IPR006561; DZF	GO:0003723; RNA binding; Molecular Function GO:0005524; ATP binding; Molecular Function GO:0006955; immune response; Biological Process GO:0016740; transferase activity; Molecular Function	K13089	Interleukin enhancer-binding factor 2 homolog	Interleukin enhancer binding factor 2
chr8	Lcro_GLEAN_10013836	3123756	3143878	0.989913	+	IPR000008; C2 calcium-dependent membrane targeting IPR000719; Protein kinase, catalytic domain IPR000961; AGC-kinase, C-terminal IPR002219; Protein kinase C-like, phorbol ester/diacylglycerol binding IPR002290; Serine/threonine-protein kinase domain IPR017442; Serine/threonine-protein kinase-like domain IPR017892; Protein kinase, C-terminal IPR018029; C2 membrane targeting protein IPR020454; Diac…	GO:0004672; protein kinase activity; Molecular Function GO:0004674; protein serine/threonine kinase activity; Molecular Function GO:0005515; protein binding; Molecular Function GO:0005524; ATP binding; Molecular Function GO:0006468; protein phosphorylation; Biological Process GO:0035556; intracellular signal transduction; Biological Process	K06068 NPKC; novel protein kinase C [EC:2.7.11.13] [EC:2.7.11.13] Cellular Processes; Cell Communication; Tight junction [PATH:ko04530] Organismal Systems; Circulatory System; Vascular smooth muscle contraction [PATH:ko04270]	Protein kinase C eta type	Uncharacterized protein (Fragment)
chr8	Lcro_GLEAN_10013861	3531758	3533886	0.997645	-	IPR007087; Zinc finger, C2H2-type IPR015880; Zinc finger, C2H2-like	GO:0005622; intracellular; Cellular Component GO:0008270; zinc ion binding; Molecular Function	K09209	Krueppel-like factor 11	Uncharacterized protein (Fragment)
chr8	Lcro_GLEAN_10013862	3534113	3534838	0.999997	-	NA	NA	NA	Krueppel-like factor 11	Uncharacterized protein (Fragment)
chr8	Lcro_GLEAN_10002813	4025065	4025460	0.999057	+	NA	NA	NA	Protein NLRC3	Uncharacterized protein
chr8	Lcro_GLEAN_10002812	4016324	4037684	0.938213	-	IPR000276; GPCR, rhodopsin-like, 7TM IPR001401; Dynamin, GTPase domain IPR015577; Interferon-induced Mx protein IPR017452; GPCR, rhodopsin-like superfamily	GO:0003924; GTPase activity; Molecular Function GO:0005525; GTP binding; Molecular Function GO:0007186; G-protein coupled receptor protein signaling pathway; Biological Process GO:0016021; integral to membrane; Cellular Component	NA	Interferon-induced GTP-binding protein Mx	Si:dkey-9i23.8
chr8	Lcro_GLEAN_10012215	4925308	4933560	0.796224	+	IPR003439; ABC transporter-like IPR003593; ATPase, AAA+ type, core IPR013525; ABC-2 type transporter IPR020064; ABC transporter, G1-like	GO:0000166; nucleotide binding; Molecular Function GO:0005524; ATP binding; Molecular Function GO:0016020; membrane; Cellular Component GO:0016021; integral to membrane; Cellular Component GO:0016887; ATPase activity; Molecular Function GO:0017111; nucleoside-triphosphatase activity; Molecular Function	K05679 ABCG1; ATP-binding cassette, subfamily G (WHITE), member 1 K05679 Environmental Information Processing; Membrane Transport; Transporters [BR:ko02000] Environmental Information Processing; Membrane Transport; Solute carrier family [BR:ko02001] Environmental Information Processing; Membrane Transport; ABC transporters [PATH:ko02010]	ATP-binding cassette sub-family G member 1	Uncharacterized protein
chr8	Lcro_GLEAN_10013513	5519333	5520586	0.998952	-	IPR000008; C2 calcium-dependent membrane targeting IPR018029; C2 membrane targeting protein	GO:0005515; protein binding; Molecular Function	NA	C2 calcium-dependent domain-containing protein 4C	Chromosome 1 SCAF14995, whole genome shotgun sequence. (Fragment)
chr8	Lcro_GLEAN_10013514	5530414	5532815	0.999858	-	IPR000008; C2 calcium-dependent membrane targeting IPR018029; C2 membrane targeting protein	GO:0005515; protein binding; Molecular Function	NA	C2 calcium-dependent domain-containing protein 4C	Chromosome 1 SCAF14995, whole genome shotgun sequence. (Fragment)
chr8	Lcro_GLEAN_10005152	6252179	6253267	1	-	IPR000276; GPCR, rhodopsin-like, 7TM IPR000355; Chemokine receptor IPR017452; GPCR, rhodopsin-like superfamily	GO:0004950; chemokine receptor activity; Molecular Function GO:0007186; G-protein coupled receptor protein signaling pathway; Biological Process GO:0016021; integral to membrane; Cellular Component	NA	C-C chemokine receptor type 6	Uncharacterized protein (Fragment)
chr8	Lcro_GLEAN_10005162	6567721	6570889	0.726804	-	IPR007743; Interferon-inducible GTPase	GO:0005525; GTP binding; Molecular Function GO:0016020; membrane; Cellular Component GO:0016817; hydrolase activity, acting on acid anhydrides; Molecular Function	NA	Interferon-inducible GTPase 5	Uncharacterized protein (Fragment)
chr8	Lcro_GLEAN_10016174	6621328	6632091	0.725703	+	IPR000910; High mobility group, HMG1/HMG2 IPR013558; CTNNB1 binding, N-teminal	GO:0003677; DNA binding; Molecular Function	NA	Transcription factor 7-like 1-A	Uncharacterized protein
chr8	Lcro_GLEAN_10016175	6635691	6640147	0.932228	-	IPR001309; Peptidase C14, ICE, catalytic subunit p20 IPR002138; Peptidase C14, caspase non-catalytic subunit p10 IPR002398; Peptidase C14, caspase precursor p45 IPR011600; Peptidase C14, caspase catalytic IPR015917; Peptidase C14, caspase precursor p45, core	GO:0004197; cysteine-type endopeptidase activity; Molecular Function GO:0006508; proteolysis; Biological Process GO:0006915; apoptosis; Biological Process GO:0008234; cysteine-type peptidase activity; Molecular Function	K04397 CASP7; caspase 7 [EC:3.4.22.60] [EC:3.4.22.60] Cellular Processes; Cell Growth and Death; Apoptosis [PATH:ko04210] Human Diseases; Neurodegenerative Diseases; Alzheimer's disease [PATH:ko05010] Human Diseases; Infectious Diseases; Pertussis [PATH:ko05133] Human Diseases; Infectious Diseases; Legionellosis [PATH:ko05134]	Caspase-3	Uncharacterized protein (Fragment)
chr8	Lcro_GLEAN_10016204	7392202	7428067	0.996026	-	IPR001223; Glycoside hydrolase, family 18, catalytic domain IPR002557; Chitin binding domain IPR003598; Immunoglobulin subtype 2 IPR003599; Immunoglobulin subtype IPR003961; Fibronectin, type III IPR007110; Immunoglobulin-like IPR011583; Chitinase II IPR013098; Immunoglobulin I-set	GO:0004553; hydrolase activity, hydrolyzing O-glycosyl compounds; Molecular Function GO:0004568; chitinase activity; Molecular Function GO:0005515; protein binding; Molecular Function GO:0005576; extracellular region; Cellular Component GO:0005975; carbohydrate metabolic process; Biological Process GO:0006030; chitin metabolic process; Biological Process GO:0006032; chitin catabolic process; Biol…	K06760 CNTN2; contactin 2 K06760 Environmental Information Processing; Signaling Molecules and Interaction; Cell adhesion molecules (CAMs) [PATH:ko04514]	Contactin-2	Uncharacterized protein
chr8	Lcro_GLEAN_10025037	8396900	8410744	0.717024	-	IPR000225; Armadillo IPR003590; Leucine-rich repeat, ribonuclease inhibitor subtype IPR007111; NACHT nucleoside triphosphatase	GO:0005515; protein binding; Molecular Function	K08332 VAC8; vacuolar protein 8 K08332 Cellular Processes; Transport and Catabolism; Regulation of autophagy [PATH:ko04140]	Protein NLRC3	Uncharacterized protein
chr8	Lcro_GLEAN_10025038	8414167	8427726	0.251578	-	IPR001683; Phox homologous domain IPR001736; Phospholipase D/Transphosphatidylase IPR015679; Phospholipase D	GO:0003824; catalytic activity; Molecular Function GO:0005515; protein binding; Molecular Function GO:0007154; cell communication; Biological Process GO:0008152; metabolic process; Biological Process GO:0035091; phosphatidylinositol binding; Molecular Function	NA	Phospholipase D1	Phospholipase D1B
chr8	Lcro_GLEAN_10025046	8563258	8570183	1	-	IPR001766; Transcription factor, fork head	GO:0003700; sequence-specific DNA binding transcription factor activity; Molecular Function GO:0006355; regulation of transcription, DNA-dependent; Biological Process GO:0043565; sequence-specific DNA binding; Molecular Function	K09408 FOXO3; forkhead box protein O3 K09408 Organismal Systems; Immune System; Chemokine signaling pathway [PATH:ko04062] Organismal Systems; Nervous System; Neurotrophin signaling pathway [PATH:ko04722] Human Diseases; Cancers; Endometrial cancer [PATH:ko05213] Human Diseases; Cancers; Non-small cell lung cancer [PATH:ko05223]	Forkhead box protein O3	Uncharacterized protein
chr8	Lcro_GLEAN_10025075	8971624	8996135	0.963132	+	IPR000719; Protein kinase, catalytic domain IPR001180; Citron-like IPR002290; Serine/threonine-protein kinase domain IPR017442; Serine/threonine-protein kinase-like domain IPR020635; Tyrosine-protein kinase, catalytic domain	GO:0004672; protein kinase activity; Molecular Function GO:0004674; protein serine/threonine kinase activity; Molecular Function GO:0005083; small GTPase regulator activity; Molecular Function GO:0005524; ATP binding; Molecular Function GO:0006468; protein phosphorylation; Biological Process	K08833	Mitogen-activated protein kinase kinase kinase kinase 5	Uncharacterized protein
chr8	Lcro_GLEAN_10025080	9056099	9061292	0.999709	-	IPR000219; Dbl homology (DH) domain	GO:0005089; Rho guanyl-nucleotide exchange factor activity; Molecular Function GO:0005622; intracellular; Cellular Component GO:0035023; regulation of Rho protein signal transduction; Biological Process	NA	Rho guanine nucleotide exchange factor 17	Chromosome 10 SCAF15123, whole genome shotgun sequence
chr8	Lcro_GLEAN_10025084	9092737	9096585	0.996977	+	IPR001079; Galectin, carbohydrate recognition domain IPR015534; Galectin-3	GO:0005529; sugar binding; Molecular Function	K06831	Galectin-3	Uncharacterized protein (Fragment)
chr8	Lcro_GLEAN_10025094	9398666	9409480	0.999242	+	IPR000719; Protein kinase, catalytic domain IPR001245; Serine-threonine/tyrosine-protein kinase IPR001452; Src homology-3 domain IPR002290; Serine/threonine-protein kinase domain IPR015785; Mitogen activated protein kinase kinase kinase 9/10/11-like IPR020635; Tyrosine-protein kinase, catalytic domain	GO:0004672; protein kinase activity; Molecular Function GO:0004674; protein serine/threonine kinase activity; Molecular Function GO:0004709; MAP kinase kinase kinase activity; Molecular Function GO:0005515; protein binding; Molecular Function GO:0005524; ATP binding; Molecular Function GO:0006468; protein phosphorylation; Biological Process	K04417 MAP3K9, MLK1; mitogen-activated protein kinase kinase kinase 9 [EC:2.7.11.25] [EC:2.7.11.25] Environmental Information Processing; Signal Transduction; Two-component system [BR:ko02022] Environmental Information Processing; Signal Transduction; MAPK signaling pathway [PATH:ko04010]	Mitogen-activated protein kinase kinase kinase 9	Uncharacterized protein (Fragment)
chr8	Lcro_GLEAN_10025108	9563616	9566255	1	-	IPR001079; Galectin, carbohydrate recognition domain	GO:0005529; sugar binding; Molecular Function	NA	Galectin-related protein B	Galectin-5
chr8	Lcro_GLEAN_10025118	9710686	9711559	0.999615	+	IPR003596; Immunoglobulin V-set, subgroup IPR007110; Immunoglobulin-like IPR013106; Immunoglobulin V-set	GO:0005515; protein binding; Molecular Function	NA	Ig heavy chain V region 3	Uncharacterized protein
chr8	Lcro_GLEAN_10025120	9714231	9716469	0.910225	+	IPR003596; Immunoglobulin V-set, subgroup IPR003599; Immunoglobulin subtype IPR007110; Immunoglobulin-like IPR013106; Immunoglobulin V-set	GO:0005515; protein binding; Molecular Function	NA	T-cell receptor beta chain V region LB2	Chromosome undetermined SCAF146, whole genome shotgun sequence. (Fragment)
chr8	Lcro_GLEAN_10025121	9718893	9729603	0.376921	+	IPR003596; Immunoglobulin V-set, subgroup IPR003597; Immunoglobulin C1-set IPR003599; Immunoglobulin subtype IPR007110; Immunoglobulin-like IPR013106; Immunoglobulin V-set	GO:0005515; protein binding; Molecular Function	K10785 TRBV; T-cell receptor beta chain V region K10785 Environmental Information Processing; Signal Transduction; Calcium signaling pathway [PATH:ko04020] Environmental Information Processing; Signaling Molecules and Interaction; Cell adhesion molecules (CAMs) [PATH:ko04514] Organismal Systems; Immune System; Antigen processing and presentation [PATH:ko04612] Organismal Systems; Immune System; T…	T-cell receptor beta chain T17T-22	Uncharacterized protein (Fragment)
chr8	Lcro_GLEAN_10025122	9734727	9747709	0.101316	+	IPR003596; Immunoglobulin V-set, subgroup IPR003599; Immunoglobulin subtype IPR007110; Immunoglobulin-like IPR013106; Immunoglobulin V-set	GO:0005515; protein binding; Molecular Function	NA	Ig lambda chain V-I region WAH	Uncharacterized protein (Fragment)
chr8	Lcro_GLEAN_10025123	9750407	9758729	0.546018	+	IPR003596; Immunoglobulin V-set, subgroup IPR003597; Immunoglobulin C1-set IPR007110; Immunoglobulin-like IPR013106; Immunoglobulin V-set	GO:0005515; protein binding; Molecular Function	K10785 TRBV; T-cell receptor beta chain V region K10785 Environmental Information Processing; Signal Transduction; Calcium signaling pathway [PATH:ko04020] Environmental Information Processing; Signaling Molecules and Interaction; Cell adhesion molecules (CAMs) [PATH:ko04514] Organismal Systems; Immune System; Antigen processing and presentation [PATH:ko04612] Organismal Systems; Immune System; T…	T-cell receptor beta chain T17T-22	Uncharacterized protein (Fragment)
chr8	Lcro_GLEAN_10025159	10203151	10250400	0.123107	-	IPR001772; Kinase-associated KA1 IPR002290; Serine/threonine-protein kinase domain IPR015940; Ubiquitin-associated/translation elongation factor EF1B, N-terminal, eukaryote IPR017442; Serine/threonine-protein kinase-like domain	GO:0004672; protein kinase activity; Molecular Function GO:0004674; protein serine/threonine kinase activity; Molecular Function GO:0005524; ATP binding; Molecular Function GO:0006468; protein phosphorylation; Biological Process	NA	MAP/microtubule affinity-regulating kinase 3	Uncharacterized protein
chr8	Lcro_GLEAN_10025164	10284901	10290422	1	-	IPR010326; Exocyst complex component Sec6	NA	NA	Tumor necrosis factor alpha-induced protein 2	Uncharacterized protein (Fragment)
chr8	Lcro_GLEAN_10002072	10537796	10548459	0.972288	-	IPR001611; Leucine-rich repeat IPR001841; Zinc finger, RING-type IPR003590; Leucine-rich repeat, ribonuclease inhibitor subtype IPR007111; NACHT nucleoside triphosphatase IPR018957; Zinc finger, C3HC4 RING-type	GO:0005515; protein binding; Molecular Function GO:0008270; zinc ion binding; Molecular Function	NA	Protein NLRC3	Uncharacterized protein (Fragment)
chr9	Lcro_GLEAN_10017923	1006928	1009682	0.971018	-	IPR003596; Immunoglobulin V-set, subgroup IPR003599; Immunoglobulin subtype IPR007110; Immunoglobulin-like IPR013106; Immunoglobulin V-set	GO:0005515; protein binding; Molecular Function	K06567 CD226, DNAM1; CD226 antigen K06567 Environmental Information Processing; Signaling Molecules and Interaction; Cell adhesion molecules (CAMs) [PATH:ko04514]	CD226 antigen	CD226 antigen
chr9	Lcro_GLEAN_10017925	1049760	1051370	1	+	IPR000980; SH2 motif IPR001496; SOCS protein, C-terminal	GO:0005515; protein binding; Molecular Function GO:0035556; intracellular signal transduction; Biological Process	K10322	Suppressor of cytokine signaling 6	Suppressor of cytokine signaling 6
chr9	Lcro_GLEAN_10017750	2058847	2095045	0.896058	-	IPR003128; Villin headpiece IPR004274; NLI interacting factor IPR007122; Gelsolin IPR007123; Gelsolin domain IPR015627; Villin	GO:0003779; actin binding; Molecular Function GO:0005515; protein binding; Molecular Function GO:0007010; cytoskeleton organization; Biological Process	K05761	Villin-1	Uncharacterized protein (Fragment)
chr9	Lcro_GLEAN_10017757	2169884	2182744	0.540884	-	IPR002130; Peptidyl-prolyl cis-trans isomerase, cyclophilin-type	GO:0003755; peptidyl-prolyl cis-trans isomerase activity; Molecular Function GO:0006457; protein folding; Biological Process	K12740	NK-tumor recognition protein	NK-tumor recognition protein
chr9	Lcro_GLEAN_10017768	2312565	2313545	1	-	IPR000010; Proteinase inhibitor I25, cystatin IPR001713; Proteinase inhibitor I25A, stefin A	GO:0004866; endopeptidase inhibitor activity; Molecular Function GO:0004869; cysteine-type endopeptidase inhibitor activity; Molecular Function GO:0005622; intracellular; Cellular Component	NA	Stefin-C	Dopamine receptor (Fragment)
chr9	Lcro_GLEAN_10017769	2316857	2317398	1	-	NA	NA	NA	Leukocyte cysteine proteinase inhibitor 1	Stefin
chr9	Lcro_GLEAN_10017770	2318919	2319590	1	-	IPR000010; Proteinase inhibitor I25, cystatin IPR001713; Proteinase inhibitor I25A, stefin A	GO:0004866; endopeptidase inhibitor activity; Molecular Function GO:0004869; cysteine-type endopeptidase inhibitor activity; Molecular Function GO:0005622; intracellular; Cellular Component	NA	Cystatin-A8	Dopamine receptor (Fragment)
chr9	Lcro_GLEAN_10017772	2326165	2330849	1	-	IPR000010; Proteinase inhibitor I25, cystatin IPR001713; Proteinase inhibitor I25A, stefin A	GO:0004866; endopeptidase inhibitor activity; Molecular Function GO:0004869; cysteine-type endopeptidase inhibitor activity; Molecular Function GO:0005622; intracellular; Cellular Component	NA	Stefin-C	Stefin
chr9	Lcro_GLEAN_10017773	2334402	2334982	1	-	IPR000010; Proteinase inhibitor I25, cystatin IPR001713; Proteinase inhibitor I25A, stefin A	GO:0004866; endopeptidase inhibitor activity; Molecular Function GO:0004869; cysteine-type endopeptidase inhibitor activity; Molecular Function GO:0005622; intracellular; Cellular Component	K13907	Stefin-C	Stefin
chr9	Lcro_GLEAN_10017774	2338404	2338981	1	-	IPR000010; Proteinase inhibitor I25, cystatin IPR001713; Proteinase inhibitor I25A, stefin A	GO:0004866; endopeptidase inhibitor activity; Molecular Function GO:0004869; cysteine-type endopeptidase inhibitor activity; Molecular Function GO:0005622; intracellular; Cellular Component	K13907	Stefin-C	Stefin
chr9	Lcro_GLEAN_10017775	2342292	2343572	1	-	IPR000010; Proteinase inhibitor I25, cystatin IPR001713; Proteinase inhibitor I25A, stefin A	GO:0004866; endopeptidase inhibitor activity; Molecular Function GO:0004869; cysteine-type endopeptidase inhibitor activity; Molecular Function GO:0005622; intracellular; Cellular Component	K13907	Cystatin-A1	Uncharacterized protein
chr9	Lcro_GLEAN_10017810	2771842	2773101	1	-	IPR001073; Complement C1q protein IPR008160; Collagen triple helix repeat	NA	NA	Complement C1q and tumor necrosis factor-related protein 9A	Uncharacterized protein (Fragment)
chr9	Lcro_GLEAN_10009042	3410812	3413314	0.999242	-	IPR001766; Transcription factor, fork head	GO:0003700; sequence-specific DNA binding transcription factor activity; Molecular Function GO:0006355; regulation of transcription, DNA-dependent; Biological Process GO:0043565; sequence-specific DNA binding; Molecular Function	K09400	Forkhead box protein H1	Forkhead box protein H1
chr9	Lcro_GLEAN_10009045	3454403	3456302	0.99957	-	IPR001073; Complement C1q protein	NA	NA	Complement C1q-like protein 2	C1q-like protein
chr9	Lcro_GLEAN_10009049	3501445	3503947	0.999242	+	IPR001766; Transcription factor, fork head	GO:0003700; sequence-specific DNA binding transcription factor activity; Molecular Function GO:0006355; regulation of transcription, DNA-dependent; Biological Process GO:0043565; sequence-specific DNA binding; Molecular Function	K09400	Forkhead box protein H1	Forkhead box protein H1
chr9	Lcro_GLEAN_10021578	4724847	4727104	0.727239	+	IPR000910; High mobility group, HMG1/HMG2	GO:0003677; DNA binding; Molecular Function	NA	Transcription factor 7	Chromosome 10 SCAF12324, whole genome shotgun sequence
chr9	Lcro_GLEAN_10021599	5497799	5499454	0.567529	-	IPR000315; Zinc finger, B-box IPR001841; Zinc finger, RING-type IPR001870; B302/SPRY domain IPR003877; SPla/RYanodine receptor SPRY IPR003879; Butyrophylin-like IPR006574; SPRY-associated IPR018355; SPla/RYanodine receptor subgroup IPR018957; Zinc finger, C3HC4 RING-type	GO:0005515; protein binding; Molecular Function GO:0005622; intracellular; Cellular Component GO:0008270; zinc ion binding; Molecular Function	NA	Tripartite motif-containing protein 16	Uncharacterized protein (Fragment)
chr9	Lcro_GLEAN_10021606	5614975	5620952	0.997417	-	IPR000215; Protease inhibitor I4, serpin IPR015557; Protease inhibitor I4, serpin B1	GO:0004867; serine-type endopeptidase inhibitor activity; Molecular Function	K13963 SERPINB; serpin B K13963 Human Diseases; Infectious Diseases; Amoebiasis [PATH:ko05146]	Leukocyte elastase inhibitor	Leukocyte elastase inhibitor
chr9	Lcro_GLEAN_10021607	5624719	5630491	0.999911	-	IPR000215; Protease inhibitor I4, serpin IPR015557; Protease inhibitor I4, serpin B1	GO:0004867; serine-type endopeptidase inhibitor activity; Molecular Function	K13963 SERPINB; serpin B K13963 Human Diseases; Infectious Diseases; Amoebiasis [PATH:ko05146]	Leukocyte elastase inhibitor	Leukocyte elastase inhibitor
chr9	Lcro_GLEAN_10019529	6408938	6572532	0.988859	-	IPR000225; Armadillo	GO:0005515; protein binding; Molecular Function	NA	Catenin delta-2	Uncharacterized protein (Fragment)
chr9	Lcro_GLEAN_10019546	7254332	7297948	0.999999	-	IPR001111; Transforming growth factor-beta, N-terminal IPR001839; Transforming growth factor-beta, C-terminal IPR015615; Transforming growth factor-beta-related	GO:0008083; growth factor activity; Molecular Function GO:0040007; growth; Biological Process	K16620	Bone morphogenetic protein 7	Bone morphogenetic protein 6
chr9	Lcro_GLEAN_10019547	7301895	7303781	0.906136	-	IPR001111; Transforming growth factor-beta, N-terminal IPR015615; Transforming growth factor-beta-related	GO:0008083; growth factor activity; Molecular Function GO:0040007; growth; Biological Process	NA	Bone morphogenetic protein 7	Bone morphogenetic protein 6
chr9	Lcro_GLEAN_10019549	7324984	7341699	0.999709	-	IPR002048; Calcium-binding EF-hand IPR018248; EF-hand IPR018249; EF-HAND 2	GO:0005509; calcium ion binding; Molecular Function	NA	Programmed cell death protein 6	Programmed cell death protein 6
chr9	Lcro_GLEAN_10019557	7395459	7405399	0.583288	+	IPR003599; Immunoglobulin subtype IPR007110; Immunoglobulin-like	GO:0005515; protein binding; Molecular Function	NA	Sialic acid-binding Ig-like lectin 5	Myelin-associated glycoprotein
chr9	Lcro_GLEAN_10019574	7734344	7736892	1	-	IPR000261; EPS15 homology (EH) IPR001401; Dynamin, GTPase domain IPR002048; Calcium-binding EF-hand IPR018249; EF-HAND 2	GO:0003924; GTPase activity; Molecular Function GO:0005509; calcium ion binding; Molecular Function GO:0005515; protein binding; Molecular Function GO:0005525; GTP binding; Molecular Function	NA	EH domain-containing protein 2	Uncharacterized protein (Fragment)
chr9	Lcro_GLEAN_10025471	8057184	8152267	0.997411	-	IPR000742; Epidermal growth factor-like, type 3 IPR001791; Laminin G domain IPR002181; Fibrinogen, alpha/beta/gamma chain, C-terminal globular IPR012680; Laminin G, subdomain 2	GO:0005102; receptor binding; Molecular Function GO:0005515; protein binding; Molecular Function GO:0007165; signal transduction; Biological Process	NA	Contactin-associated protein-like 2	Contactin-associated protein-like 2 (Fragment)
chr9	Lcro_GLEAN_10025476	8454840	8466423	0.999242	-	IPR001368; TNFR/CD27/30/40/95 cysteine-rich region	GO:0004872; receptor activity; Molecular Function	K05147 TNFRSF11A, RANK; tumor necrosis factor receptor superfamily member 11A K05147 Environmental Information Processing; Signaling Molecules and Interaction; Cytokine-cytokine receptor interaction [PATH:ko04060] Organismal Systems; Development; Osteoclast differentiation [PATH:ko04380] Human Diseases; Immune Diseases; Rheumatoid arthritis [PATH:ko05323]	Tumor necrosis factor receptor superfamily member 11A	Tumor necrosis factor receptor superfamily member 11A
chr9	Lcro_GLEAN_10025490	9082014	9091542	1	-	NA	NA	NA	Death-associated protein 1	Death-associated protein 1
chr9	Lcro_GLEAN_10025491	9102468	9135565	0.999206	-	IPR000225; Armadillo	GO:0005515; protein binding; Molecular Function	NA	Catenin delta-2	Uncharacterized protein (Fragment)
chr9	Lcro_GLEAN_10025526	10296431	10306027	0.679708	+	NA	NA	NA	Immunoglobulin superfamily member 21	Uncharacterized protein (Fragment)
chr9	Lcro_GLEAN_10025580	11025992	11032158	1	-	IPR000103; Pyridine nucleotide-disulphide oxidoreductase, class-II IPR001327; Pyridine nucleotide-disulphide oxidoreductase, NAD-binding region IPR013027; FAD-dependent pyridine nucleotide-disulphide oxidoreductase IPR017941; Rieske [2Fe-2S] iron-sulphur domain	GO:0016491; oxidoreductase activity; Molecular Function GO:0050660; flavin adenine dinucleotide binding; Molecular Function GO:0051537; 2 iron, 2 sulfur cluster binding; Molecular Function GO:0055114; oxidation-reduction process; Biological Process	NA	Apoptosis-inducing factor 3	Uncharacterized protein
chr9	Lcro_GLEAN_10025581	11043044	11043595	0.999613	-	IPR004031; PMP-22/EMP/MP20/Claudin IPR006187; Claudin	GO:0005198; structural molecule activity; Molecular Function GO:0005923; tight junction; Cellular Component GO:0016020; membrane; Cellular Component	K06087 CLDN; claudin K06087 Environmental Information Processing; Signaling Molecules and Interaction; Cell adhesion molecules (CAMs) [PATH:ko04514] Cellular Processes; Cell Communication; Tight junction [PATH:ko04530] Organismal Systems; Immune System; Leukocyte transendothelial migration [PATH:ko04670] Human Diseases; Infectious Diseases; Hepatitis C [PATH:ko05160]	Claudin-22	Uncharacterized protein
chr9	Lcro_GLEAN_10019475	11111045	11111738	1	+	IPR004827; Basic-leucine zipper (bZIP) transcription factor IPR011700; Basic leucine zipper	GO:0003700; sequence-specific DNA binding transcription factor activity; Molecular Function GO:0006355; regulation of transcription, DNA-dependent; Biological Process GO:0043565; sequence-specific DNA binding; Molecular Function GO:0046983; protein dimerization activity; Molecular Function	NA	CCAAT/enhancer-binding protein epsilon	Uncharacterized protein
chr9	Lcro_GLEAN_10019494	11989313	11998785	0.997759	-	IPR001452; Src homology-3 domain IPR001683; Phox homologous domain IPR019497; Sorting nexin protein, WASP-binding domain	GO:0005515; protein binding; Molecular Function GO:0007154; cell communication; Biological Process GO:0035091; phosphatidylinositol binding; Molecular Function	NA	Sorting nexin-18	Uncharacterized protein
chr9	Lcro_GLEAN_10026126	12742366	12750157	0.984129	+	IPR000301; Tetraspanin, subgroup IPR018499; Tetraspanin	GO:0016021; integral to membrane; Cellular Component	K06497 CD63, MLA1; CD63 antigen K06497 Cellular Processes; Transport and Catabolism; Lysosome [PATH:ko04142]	CD63 antigen	CD63 (Fragment)
chr9	Lcro_GLEAN_10026130	12795319	12818031	0.999827	-	IPR000756; Diacylglycerol kinase, accessory domain IPR001206; Diacylglycerol kinase, catalytic domain IPR001478; PDZ/DHR/GF IPR002048; Calcium-binding EF-hand IPR002219; Protein kinase C-like, phorbol ester/diacylglycerol binding IPR018249; EF-HAND 2	GO:0004143; diacylglycerol kinase activity; Molecular Function GO:0005509; calcium ion binding; Molecular Function GO:0005515; protein binding; Molecular Function GO:0007205; activation of protein kinase C activity by G-protein coupled receptor protein signaling pathway; Biological Process GO:0035556; intracellular signal transduction; Biological Process	K00901 E2.7.1.107, DGK, dgkA; diacylglycerol kinase [EC:2.7.1.107] [EC:2.7.1.107] Metabolism; Lipid Metabolism; Glycerolipid metabolism [PATH:ko00561] Metabolism; Lipid Metabolism; Glycerophospholipid metabolism [PATH:ko00564] Environmental Information Processing; Signal Transduction; Phosphatidylinositol signaling system [PATH:ko04070]	Diacylglycerol kinase alpha	Uncharacterized protein
chr9	Lcro_GLEAN_10026143	13027393	13044705	0.899408	-	IPR000591; DEP domain IPR000595; Cyclic nucleotide-binding domain IPR000651; Ras-like guanine nucleotide exchange factor, N-terminal IPR001895; Guanine-nucleotide dissociation stimulator CDC25 IPR002373; cAMP/cGMP-dependent protein kinase IPR008937; Ras guanine nucleotide exchange factor	GO:0001932; regulation of protein phosphorylation; Biological Process GO:0005085; guanyl-nucleotide exchange factor activity; Molecular Function GO:0005622; intracellular; Cellular Component GO:0005952; cAMP-dependent protein kinase complex; Cellular Component GO:0007264; small GTPase mediated signal transduction; Biological Process GO:0008603; cAMP-dependent protein kinase regulator activity; Mo…	K08014 RAPGEF3, EPAC1; Rap guanine nucleotide exchange factor (GEF) 3 K08014 Organismal Systems; Immune System; Leukocyte transendothelial migration [PATH:ko04670] Organismal Systems; Nervous System; Serotonergic synapse [PATH:ko04726] Organismal Systems; Nervous System; Long-term potentiation [PATH:ko04720]	Rap guanine nucleotide exchange factor 3	Uncharacterized protein (Fragment)
chr9	Lcro_GLEAN_10026171	13964313	13969207	1	-	IPR001368; TNFR/CD27/30/40/95 cysteine-rich region	GO:0004872; receptor activity; Molecular Function	K03160 TNFRSF5, CD40; tumor necrosis factor receptor superfamily member 5 K03160 Environmental Information Processing; Signaling Molecules and Interaction; Cytokine-cytokine receptor interaction [PATH:ko04060] Environmental Information Processing; Signaling Molecules and Interaction; Cell adhesion molecules (CAMs) [PATH:ko04514] Organismal Systems; Immune System; Toll-like receptor signaling path…	Tumor necrosis factor receptor superfamily member 5	Tumor necrosis factor receptor superfamily member 5
chr9	Lcro_GLEAN_10026190	14425323	14450608	0.998195	-	IPR000210; BTB/POZ-like IPR000225; Armadillo IPR013069; BTB/POZ	GO:0005515; protein binding; Molecular Function	K05690 CTNND1; catenin (cadherin-associated protein), delta 1 K05690 Cellular Processes; Cell Communication; Adherens junction [PATH:ko04520] Organismal Systems; Immune System; Leukocyte transendothelial migration [PATH:ko04670]	Catenin delta-1	Uncharacterized protein
chr9	Lcro_GLEAN_10026191	14458755	14465741	0.550442	+	IPR001304; C-type lectin	GO:0005488; binding; Molecular Function	K06563 CD209; CD209 antigen K06563 Cellular Processes; Transport and Catabolism; Phagosome [PATH:ko04145] Human Diseases; Infectious Diseases; Tuberculosis [PATH:ko05152] Human Diseases; Infectious Diseases; Measles [PATH:ko05162]	CD209 antigen	Uncharacterized protein (Fragment)
chr9	Lcro_GLEAN_10026192	14467762	14470147	0.44051	+	IPR001304; C-type lectin	GO:0005488; binding; Molecular Function	NA	C-type lectin domain family 4 member F	Uncharacterized protein (Fragment)
chr9	Lcro_GLEAN_10026226	15188211	15202111	0.499616	+	IPR001315; Caspase Recruitment IPR008144; Guanylate kinase	GO:0005515; protein binding; Molecular Function GO:0005622; intracellular; Cellular Component GO:0042981; regulation of apoptosis; Biological Process	NA	Caspase recruitment domain-containing protein 14	Uncharacterized protein (Fragment)
chr9	Lcro_GLEAN_10026230	15306321	15311717	0.998368	+	IPR000756; Diacylglycerol kinase, accessory domain IPR001206; Diacylglycerol kinase, catalytic domain IPR002219; Protein kinase C-like, phorbol ester/diacylglycerol binding	GO:0004143; diacylglycerol kinase activity; Molecular Function GO:0007205; activation of protein kinase C activity by G-protein coupled receptor protein signaling pathway; Biological Process GO:0035556; intracellular signal transduction; Biological Process	K00901 E2.7.1.107, DGK, dgkA; diacylglycerol kinase [EC:2.7.1.107] [EC:2.7.1.107] Metabolism; Lipid Metabolism; Glycerolipid metabolism [PATH:ko00561] Metabolism; Lipid Metabolism; Glycerophospholipid metabolism [PATH:ko00564] Environmental Information Processing; Signal Transduction; Phosphatidylinositol signaling system [PATH:ko04070]	Diacylglycerol kinase epsilon	Uncharacterized protein (Fragment)
chr9	Lcro_GLEAN_10026231	15316539	15320712	0.56812	-	IPR000315; Zinc finger, B-box IPR001841; Zinc finger, RING-type IPR018957; Zinc finger, C3HC4 RING-type	GO:0005515; protein binding; Molecular Function GO:0005622; intracellular; Cellular Component GO:0008270; zinc ion binding; Molecular Function	K10652 TRIM25, EFP; tripartite motif-containing protein 25 K10652 Organismal Systems; Immune System; RIG-I-like receptor signaling pathway [PATH:ko04622] Human Diseases; Infectious Diseases; Influenza A [PATH:ko05164]	E3 ubiquitin/ISG15 ligase TRIM25	Uncharacterized protein (Fragment)
chr9	Lcro_GLEAN_10026232	15325209	15330614	0.998127	-	IPR001841; Zinc finger, RING-type IPR001870; B302/SPRY domain IPR003877; SPla/RYanodine receptor SPRY IPR003879; Butyrophylin-like IPR006574; SPRY-associated IPR018355; SPla/RYanodine receptor subgroup	GO:0005515; protein binding; Molecular Function GO:0008270; zinc ion binding; Molecular Function	K10652 TRIM25, EFP; tripartite motif-containing protein 25 K10652 Organismal Systems; Immune System; RIG-I-like receptor signaling pathway [PATH:ko04622] Human Diseases; Infectious Diseases; Influenza A [PATH:ko05164]	E3 ubiquitin/ISG15 ligase TRIM25	Uncharacterized protein (Fragment)
chr9	Lcro_GLEAN_10014509	16692180	16695477	1	+	IPR009345; BMP/activin membrane-bound inhibitor	NA	K10162	BMP and activin membrane-bound inhibitor homolog	BMP and activin membrane-bound inhibitor homolog
chr9	Lcro_GLEAN_10014511	16876241	16972680	0.523385	-	IPR003590; Leucine-rich repeat, ribonuclease inhibitor subtype	NA	NA	NACHT, LRR and PYD domains-containing protein 12	Uncharacterized protein (Fragment)
chr9	Lcro_GLEAN_10014515	17219113	17262822	0.999242	-	IPR000198; Rho GTPase-activating protein domain IPR001806; Ras GTPase IPR002713; FF domain IPR013753; Ras	GO:0005525; GTP binding; Molecular Function GO:0005622; intracellular; Cellular Component GO:0007165; signal transduction; Biological Process GO:0007264; small GTPase mediated signal transduction; Biological Process	K13709 ARHGAP5; Rho GTPase-activating protein 5 K13709 Cellular Processes; Cell Communication; Focal adhesion [PATH:ko04510] Organismal Systems; Immune System; Leukocyte transendothelial migration [PATH:ko04670]	Rho GTPase-activating protein 5	Uncharacterized protein (Fragment)
chr9	Lcro_GLEAN_10014199	17845233	17850964	0.994977	+	IPR000719; Protein kinase, catalytic domain IPR002290; Serine/threonine-protein kinase domain IPR017442; Serine/threonine-protein kinase-like domain IPR020635; Tyrosine-protein kinase, catalytic domain	GO:0004672; protein kinase activity; Molecular Function GO:0004674; protein serine/threonine kinase activity; Molecular Function GO:0005524; ATP binding; Molecular Function GO:0006468; protein phosphorylation; Biological Process	K04415 MAP3K8, COT; mitogen-activated protein kinase kinase kinase 8 [EC:2.7.11.25] [EC:2.7.11.25] Environmental Information Processing; Signal Transduction; Two-component system [BR:ko02022] Environmental Information Processing; Signal Transduction; MAPK signaling pathway [PATH:ko04010] Organismal Systems; Immune System; Toll-like receptor signaling pathway [PATH:ko04620] Organismal Systems; Imm…	Mitogen-activated protein kinase kinase kinase 8	Uncharacterized protein
chr9	Lcro_GLEAN_10014200	17856135	17892589	0.98116	+	IPR003590; Leucine-rich repeat, ribonuclease inhibitor subtype IPR007111; NACHT nucleoside triphosphatase	NA	NA	Protein NLRC3	Uncharacterized protein
chr9	Lcro_GLEAN_10014216	18290849	18294759	1	-	IPR011419; ATP12, ATPase F1F0-assembly protein	GO:0043461; proton-transporting ATP synthase complex assembly; Biological Process	K07556	ATP synthase mitochondrial F1 complex assembly factor 2	ATP synthase mitochondrial F1 complex assembly factor 2
chr9	Lcro_GLEAN_10007360	18925265	18968540	0.98025	+	IPR000742; Epidermal growth factor-like, type 3 IPR000998; MAM domain IPR001007; von Willebrand factor, type C IPR001846; von Willebrand factor, type D domain IPR001881; EGF-like calcium-binding IPR002919; Protease inhibitor I8, cysteine-rich trypsin inhibitor-like IPR006210; Epidermal growth factor-like IPR006552; VWC out IPR014853; Conserved-cysteine-rich domain	GO:0005509; calcium ion binding; Molecular Function GO:0005515; protein binding; Molecular Function GO:0016020; membrane; Cellular Component	NA	Zonadhesin	Uncharacterized protein (Fragment)
chr9	Lcro_GLEAN_10004387	19323020	19365652	0.996671	-	IPR001084; Tubulin-binding Tau protein IPR001611; Leucine-rich repeat IPR003590; Leucine-rich repeat, ribonuclease inhibitor subtype IPR007111; NACHT nucleoside triphosphatase	GO:0005515; protein binding; Molecular Function GO:0007026; negative regulation of microtubule depolymerization; Biological Process	NA	Protein NLRC3	Uncharacterized protein
chr9	Lcro_GLEAN_10004390	19519904	19667212	0.310516	+	IPR000742; Epidermal growth factor-like, type 3 IPR000859; CUB IPR001881; EGF-like calcium-binding IPR006209; EGF IPR006210; Epidermal growth factor-like IPR013091; EGF calcium-binding	GO:0005509; calcium ion binding; Molecular Function GO:0005515; protein binding; Molecular Function	K14616 CUBN; cubilin K14616 Organismal Systems; Digestive System; Vitamin digestion and absorption [PATH:ko04977]	Cubilin	Uncharacterized protein (Fragment)
chr9	Lcro_GLEAN_10019864	21224527	21286697	0.999296	+	IPR000719; Protein kinase, catalytic domain IPR002290; Serine/threonine-protein kinase domain IPR017442; Serine/threonine-protein kinase-like domain IPR020635; Tyrosine-protein kinase, catalytic domain	GO:0004672; protein kinase activity; Molecular Function GO:0004674; protein serine/threonine kinase activity; Molecular Function GO:0005524; ATP binding; Molecular Function GO:0006468; protein phosphorylation; Biological Process	K04426 MAP3K5, ASK1; mitogen-activated protein kinase kinase kinase 5 [EC:2.7.11.25] [EC:2.7.11.25] Genetic Information Processing; Folding, Sorting and Degradation; Protein processing in endoplasmic reticulum [PATH:ko04141] Environmental Information Processing; Signal Transduction; Two-component system [BR:ko02022] Environmental Information Processing; Signal Transduction; MAPK signaling pathway…	Mitogen-activated protein kinase kinase kinase 5	Uncharacterized protein (Fragment)
chr9	Lcro_GLEAN_10019871	21374322	21377083	0.99608	-	IPR001611; Leucine-rich repeat IPR003591; Leucine-rich repeat, typical subtype	GO:0005515; protein binding; Molecular Function	NA	Toll-like receptor 5	Uncharacterized protein (Fragment)
chr9	Lcro_GLEAN_10019880	21577993	21658815	0.759367	-	IPR001190; Speract/scavenger receptor IPR008160; Collagen triple helix repeat IPR017448; Speract/scavenger receptor-related	GO:0005044; scavenger receptor activity; Molecular Function GO:0016020; membrane; Cellular Component	NA	Scavenger receptor class A member 5	Chromosome 14 SCAF15120, whole genome shotgun sequence. (Fragment)
chr9	Lcro_GLEAN_10019912	22085399	22089774	0.772433	-	IPR003555; Claudin-11 IPR006187; Claudin	GO:0005198; structural molecule activity; Molecular Function GO:0005923; tight junction; Cellular Component	NA	Claudin-11	Uncharacterized protein
chr9	Lcro_GLEAN_10010483	22427717	22433885	0.999011	+	IPR001611; Leucine-rich repeat IPR003591; Leucine-rich repeat, typical subtype IPR003598; Immunoglobulin subtype 2 IPR003599; Immunoglobulin subtype IPR003961; Fibronectin, type III IPR007110; Immunoglobulin-like IPR013098; Immunoglobulin I-set	GO:0005515; protein binding; Molecular Function	NA	Leucine-rich repeat, immunoglobulin-like domain and transmembrane domain-containing protein 3	Uncharacterized protein
chr9	Lcro_GLEAN_10015397	24018029	24019060	0.727111	+	IPR000276; GPCR, rhodopsin-like, 7TM IPR000826; Formyl/methionyl peptide receptor IPR017452; GPCR, rhodopsin-like superfamily	GO:0004982; N-formyl peptide receptor activity; Molecular Function GO:0007186; G-protein coupled receptor protein signaling pathway; Biological Process GO:0016021; integral to membrane; Cellular Component	NA	Chemokine-like receptor 1	Uncharacterized protein (Fragment)
chr9	Lcro_GLEAN_10015404	24066176	24069379	0.914978	-	IPR001368; TNFR/CD27/30/40/95 cysteine-rich region	GO:0004872; receptor activity; Molecular Function	NA	IGF-like family receptor 1	Uncharacterized protein
chr9	Lcro_GLEAN_10015408	24143153	24160531	0.999242	+	IPR000082; SEA IPR000859; CUB IPR001254; Peptidase S1/S6, chymotrypsin/Hap IPR002172; Low-density lipoprotein (LDL) receptor class A repeat	GO:0004252; serine-type endopeptidase activity; Molecular Function GO:0005515; protein binding; Molecular Function GO:0006508; proteolysis; Biological Process	NA	Suppressor of tumorigenicity 14 protein	Uncharacterized protein (Fragment)
chr9	Lcro_GLEAN_10015411	24227677	24245247	1	-	IPR000082; SEA IPR000859; CUB IPR001254; Peptidase S1/S6, chymotrypsin/Hap IPR002172; Low-density lipoprotein (LDL) receptor class A repeat	GO:0004252; serine-type endopeptidase activity; Molecular Function GO:0005515; protein binding; Molecular Function GO:0006508; proteolysis; Biological Process	NA	Suppressor of tumorigenicity 14 protein homolog	Uncharacterized protein (Fragment)
chr9	Lcro_GLEAN_10013807	24911117	24922813	0.930082	+	IPR013287; Claudin-12	NA	NA	Claudin-12	Claudin-12
chr9	Lcro_GLEAN_10000684	25614682	25637489	0.996076	-	IPR000859; CUB	NA	NA	Cubilin	Uncharacterized protein (Fragment)
chr10	Lcro_GLEAN_10013451	292351	293154	1	+	IPR001766; Transcription factor, fork head	GO:0003700; sequence-specific DNA binding transcription factor activity; Molecular Function GO:0006355; regulation of transcription, DNA-dependent; Biological Process GO:0043565; sequence-specific DNA binding; Molecular Function	NA	Forkhead box protein L2	Foxl2 diverged paralog
chr10	Lcro_GLEAN_10013455	379185	411442	0.999983	+	IPR002126; Cadherin	GO:0005509; calcium ion binding; Molecular Function GO:0007156; homophilic cell adhesion; Biological Process GO:0016020; membrane; Cellular Component	NA	Calsyntenin-1	Uncharacterized protein
chr10	Lcro_GLEAN_10013471	946715	954798	0.999761	-	IPR006047; Glycosyl hydrolase, family 13, catalytic domain IPR006589; Glycosyl hydrolase, family 13, subfamily, catalytic domain IPR015902; Alpha amylase	GO:0003824; catalytic activity; Molecular Function GO:0005975; carbohydrate metabolic process; Biological Process GO:0043169; cation binding; Molecular Function	K06519 SLC3A2, MDU1; solute carrier family 3, member 2 K06519 Organismal Systems; Digestive System; Protein digestion and absorption [PATH:ko04974]	4F2 cell-surface antigen heavy chain	Uncharacterized protein
chr10	Lcro_GLEAN_10013472	958101	958433	0.999979	-	IPR015902; Alpha amylase	NA	NA	4F2 cell-surface antigen heavy chain	Uncharacterized protein
chr10	Lcro_GLEAN_10012553	1616918	1624156	0.982358	+	IPR000276; GPCR, rhodopsin-like, 7TM IPR000355; Chemokine receptor IPR017452; GPCR, rhodopsin-like superfamily	GO:0004950; chemokine receptor activity; Molecular Function GO:0007186; G-protein coupled receptor protein signaling pathway; Biological Process GO:0016021; integral to membrane; Cellular Component	NA	C-C chemokine receptor type 1	Uncharacterized protein
chr10	Lcro_GLEAN_10003728	2923298	2929244	0.999964	+	IPR006921; Interferon-related developmental regulator, C-terminal IPR007701; Interferon-related developmental regulator, N-terminal	NA	NA	Interferon-related developmental regulator 1	Uncharacterized protein
chr10	Lcro_GLEAN_10021447	3089684	3112198	0.705896	+	IPR000980; SH2 motif IPR001217; STAT transcription factor, core IPR013799; STAT transcription factor, protein interaction IPR013800; STAT transcription factor, all-alpha IPR013801; STAT transcription factor, DNA-binding	GO:0003700; sequence-specific DNA binding transcription factor activity; Molecular Function GO:0004871; signal transducer activity; Molecular Function GO:0005515; protein binding; Molecular Function GO:0005634; nucleus; Cellular Component GO:0006355; regulation of transcription, DNA-dependent; Biological Process GO:0007165; signal transduction; Biological Process	K11222 STAT4; signal transducer and activator of transcription 4 K11222 Environmental Information Processing; Signal Transduction; Jak-STAT signaling pathway [PATH:ko04630]	Signal transducer and activator of transcription 4	Signal transducer and activator of transcription 4
chr10	Lcro_GLEAN_10021448	3115505	3122435	0.708787	+	IPR000980; SH2 motif IPR001217; STAT transcription factor, core IPR013799; STAT transcription factor, protein interaction IPR013800; STAT transcription factor, all-alpha IPR013801; STAT transcription factor, DNA-binding	GO:0003700; sequence-specific DNA binding transcription factor activity; Molecular Function GO:0004871; signal transducer activity; Molecular Function GO:0005515; protein binding; Molecular Function GO:0005634; nucleus; Cellular Component GO:0006355; regulation of transcription, DNA-dependent; Biological Process GO:0007165; signal transduction; Biological Process	NA	Signal transducer and activator of transcription 1	Uncharacterized protein
chr10	Lcro_GLEAN_10021482	3629640	3640810	0.998117	-	IPR000313; PWWP IPR001487; Bromodomain IPR001965; Zinc finger, PHD-type IPR019542; Enhancer of polycomb-like, N-terminal IPR019787; Zinc finger, PHD-finger	GO:0005515; protein binding; Molecular Function GO:0008270; zinc ion binding; Molecular Function	K11350	Bromodomain and PHD finger-containing protein 3	Uncharacterized protein
chr10	Lcro_GLEAN_10021483	3643600	3652855	0.999496	-	IPR000719; Protein kinase, catalytic domain IPR002290; Serine/threonine-protein kinase domain IPR008352; MAP kinase, p38 IPR017442; Serine/threonine-protein kinase-like domain IPR020635; Tyrosine-protein kinase, catalytic domain	GO:0004672; protein kinase activity; Molecular Function GO:0004674; protein serine/threonine kinase activity; Molecular Function GO:0004707; MAP kinase activity; Molecular Function GO:0005524; ATP binding; Molecular Function GO:0006468; protein phosphorylation; Biological Process	K04441 P38; p38 MAP kinase [EC:2.7.11.24] [EC:2.7.11.24] Environmental Information Processing; Signal Transduction; Two-component system [BR:ko02022] Environmental Information Processing; Signal Transduction; MAPK signaling pathway [PATH:ko04010] Environmental Information Processing; Signal Transduction; MAPK signaling pathway - yeast [PATH:ko04011] Environmental Information Processing; Signal Tr…	Mitogen-activated protein kinase 13	Uncharacterized protein (Fragment)
chr10	Lcro_GLEAN_10021498	4242580	4247789	0.997234	+	IPR000276; GPCR, rhodopsin-like, 7TM IPR002232; 5-Hydroxytryptamine 6 receptor IPR017452; GPCR, rhodopsin-like superfamily	GO:0007186; G-protein coupled receptor protein signaling pathway; Biological Process GO:0016021; integral to membrane; Cellular Component	K04162 HTR6; 5-hydroxytryptamine receptor 6 K04162 Environmental Information Processing; Signal Transduction; Calcium signaling pathway [PATH:ko04020] Environmental Information Processing; Signaling Molecules and Interaction; G protein-coupled receptors [BR:ko04030] Environmental Information Processing; Signaling Molecules and Interaction; Enzyme-linked receptors [BR:ko01020] Environmental Inform…	5-hydroxytryptamine receptor 6	Uncharacterized protein
chr10	Lcro_GLEAN_10017671	5029230	5036920	0.998952	-	IPR000719; Protein kinase, catalytic domain IPR002290; Serine/threonine-protein kinase domain IPR008352; MAP kinase, p38 IPR017442; Serine/threonine-protein kinase-like domain IPR020635; Tyrosine-protein kinase, catalytic domain	GO:0004672; protein kinase activity; Molecular Function GO:0004674; protein serine/threonine kinase activity; Molecular Function GO:0004707; MAP kinase activity; Molecular Function GO:0005524; ATP binding; Molecular Function GO:0006468; protein phosphorylation; Biological Process	K04441 P38; p38 MAP kinase [EC:2.7.11.24] [EC:2.7.11.24] Environmental Information Processing; Signal Transduction; Two-component system [BR:ko02022] Environmental Information Processing; Signal Transduction; MAPK signaling pathway [PATH:ko04010] Environmental Information Processing; Signal Transduction; MAPK signaling pathway - yeast [PATH:ko04011] Environmental Information Processing; Signal Tr…	Mitogen-activated protein kinase 14A	Uncharacterized protein
chr10	Lcro_GLEAN_10017679	5359406	5477067	0.74042	-	IPR005331; Sulfotransferase IPR018011; Carbohydrate sulfotransferase-related	GO:0008146; sulfotransferase activity; Molecular Function GO:0016021; integral to membrane; Cellular Component GO:0016051; carbohydrate biosynthetic process; Biological Process	K07779 CHST13; chondroitin 4-sulfotransferase 13 [EC:2.8.2.5] [EC:2.8.2.5] Metabolism; Energy Metabolism; Sulfur metabolism [PATH:ko00920] Metabolism; Glycan Biosynthesis and Metabolism; Glycosaminoglycan biosynthesis - chondroitin sulfate [PATH:ko00532]	Carbohydrate sulfotransferase 11	Uncharacterized protein (Fragment)
chr10	Lcro_GLEAN_10017688	5860937	5862616	0.996974	-	IPR000980; SH2 motif IPR001496; SOCS protein, C-terminal IPR022252; Suppressor of cytokine signalling	GO:0005515; protein binding; Molecular Function GO:0035556; intracellular signal transduction; Biological Process	K04697 SOCS4; suppressor of cytokine signaling 4 K04697 Environmental Information Processing; Signal Transduction; Jak-STAT signaling pathway [PATH:ko04630] Organismal Systems; Endocrine System; Insulin signaling pathway [PATH:ko04910] Human Diseases; Endocrine and Metabolic Diseases; Type II diabetes mellitus [PATH:ko04930]	Suppressor of cytokine signaling 4	Suppressor of cytokine signaling 9
chr10	Lcro_GLEAN_10005764	6511351	6605963	0.341443	+	IPR010703; Dedicator of cytokinesis	GO:0005085; guanyl-nucleotide exchange factor activity; Molecular Function GO:0005525; GTP binding; Molecular Function GO:0051020; GTPase binding; Molecular Function	NA	Dedicator of cytokinesis protein 3	Uncharacterized protein
chr10	Lcro_GLEAN_10005779	6937209	6940993	0.724606	+	IPR001370; Baculoviral inhibition of apoptosis protein repeat IPR001841; Zinc finger, RING-type	GO:0005515; protein binding; Molecular Function GO:0005622; intracellular; Cellular Component GO:0008270; zinc ion binding; Molecular Function	K16061	Baculoviral IAP repeat-containing protein 7-A	Chromosome undetermined SCAF8908, whole genome shotgun sequence. (Fragment)
chr10	Lcro_GLEAN_10008121	7135400	7138685	1	+	IPR003590; Leucine-rich repeat, ribonuclease inhibitor subtype IPR007111; NACHT nucleoside triphosphatase	NA	NA	NACHT, LRR and PYD domains-containing protein 12	Uncharacterized protein
chr10	Lcro_GLEAN_10008134	7287914	7297689	1	+	IPR000719; Protein kinase, catalytic domain IPR002290; Serine/threonine-protein kinase domain IPR017442; Serine/threonine-protein kinase-like domain IPR020635; Tyrosine-protein kinase, catalytic domain	GO:0004672; protein kinase activity; Molecular Function GO:0004674; protein serine/threonine kinase activity; Molecular Function GO:0005524; ATP binding; Molecular Function GO:0006468; protein phosphorylation; Biological Process	K04443 MAPKAPK2; mitogen-activated protein kinase-activated protein kinase 2 [EC:2.7.11.1] [EC:2.7.11.1] Environmental Information Processing; Signal Transduction; Two-component system [BR:ko02022] Environmental Information Processing; Signal Transduction; MAPK signaling pathway [PATH:ko04010] Environmental Information Processing; Signal Transduction; VEGF signaling pathway [PATH:ko04370] Organis…	MAP kinase-activated protein kinase 2	MAP kinase-activated protein kinase 2
chr11	Lcro_GLEAN_10004656	14489	60255	0.995968	-	IPR001766; Transcription factor, fork head	GO:0003700; sequence-specific DNA binding transcription factor activity; Molecular Function GO:0006355; regulation of transcription, DNA-dependent; Biological Process GO:0043565; sequence-specific DNA binding; Molecular Function	NA	Forkhead box protein J3	Uncharacterized protein
chr11	Lcro_GLEAN_10004663	141395	151886	1	+	IPR000488; Death	GO:0005515; protein binding; Molecular Function GO:0007165; signal transduction; Biological Process	NA	Tumor necrosis factor receptor superfamily member 1A	Uncharacterized protein
chr11	Lcro_GLEAN_10004669	221603	222728	0.999991	-	IPR004020; Pyrin	NA	NA	Apoptosis-associated speck-like protein containing a CARD	Caspase (Fragment)
chr11	Lcro_GLEAN_10004675	300120	300875	0.834107	+	NA	NA	NA	Interferon-induced protein with tetratricopeptide repeats 1	Interferon-inducible protein 56
chr11	Lcro_GLEAN_10016004	381239	425891	0.761344	-	IPR001045; Spermine synthase IPR002121; Helicase/RNase D C-terminal, HRDC domain IPR002562; 3'-5' exonuclease IPR003598; Immunoglobulin subtype 2 IPR003599; Immunoglobulin subtype IPR003961; Fibronectin, type III IPR007110; Immunoglobulin-like IPR012588; Exosome-associated factor Rrp6, N-terminal IPR013098; Immunoglobulin I-set	GO:0000176; nuclear exosome (RNase complex); Cellular Component GO:0003676; nucleic acid binding; Molecular Function GO:0003824; catalytic activity; Molecular Function GO:0005515; protein binding; Molecular Function GO:0005622; intracellular; Cellular Component GO:0006139; nucleobase, nucleoside, nucleotide and nucleic acid metabolic process; Biological Process GO:0006396; RNA processing; Biologi…	NA	Contactin-3	Uncharacterized protein
chr11	Lcro_GLEAN_10016006	547970	611321	0.799157	+	IPR003598; Immunoglobulin subtype 2 IPR003599; Immunoglobulin subtype IPR003961; Fibronectin, type III IPR007110; Immunoglobulin-like IPR013098; Immunoglobulin I-set	GO:0005515; protein binding; Molecular Function	NA	Contactin-4	Uncharacterized protein (Fragment)
chr11	Lcro_GLEAN_10016021	1232010	1234666	0.999242	+	IPR001315; Caspase Recruitment IPR002398; Peptidase C14, caspase precursor p45 IPR004020; Pyrin	GO:0004197; cysteine-type endopeptidase activity; Molecular Function GO:0005515; protein binding; Molecular Function GO:0005622; intracellular; Cellular Component GO:0006508; proteolysis; Biological Process GO:0042981; regulation of apoptosis; Biological Process	K12799 PYCARD, ASC; apoptosis-associated speck-like protein containing a CARD K12799 Organismal Systems; Immune System; NOD-like receptor signaling pathway [PATH:ko04621] Organismal Systems; Immune System; Cytosolic DNA-sensing pathway [PATH:ko04623] Human Diseases; Infectious Diseases; Salmonella infection [PATH:ko05132] Human Diseases; Infectious Diseases; Pertussis [PATH:ko05133] Human Disease…	Apoptosis-associated speck-like protein containing a CARD	ASC
chr11	Lcro_GLEAN_10016022	1235372	1238037	0.999901	+	IPR001315; Caspase Recruitment IPR002398; Peptidase C14, caspase precursor p45 IPR004020; Pyrin	GO:0004197; cysteine-type endopeptidase activity; Molecular Function GO:0005515; protein binding; Molecular Function GO:0005622; intracellular; Cellular Component GO:0006508; proteolysis; Biological Process GO:0042981; regulation of apoptosis; Biological Process	K12799 PYCARD, ASC; apoptosis-associated speck-like protein containing a CARD K12799 Organismal Systems; Immune System; NOD-like receptor signaling pathway [PATH:ko04621] Organismal Systems; Immune System; Cytosolic DNA-sensing pathway [PATH:ko04623] Human Diseases; Infectious Diseases; Salmonella infection [PATH:ko05132] Human Diseases; Infectious Diseases; Pertussis [PATH:ko05133] Human Disease…	Apoptosis-associated speck-like protein containing a CARD	ASC
chr11	Lcro_GLEAN_10016023	1238733	1242193	1	+	IPR001315; Caspase Recruitment IPR002398; Peptidase C14, caspase precursor p45 IPR004020; Pyrin	GO:0004197; cysteine-type endopeptidase activity; Molecular Function GO:0005515; protein binding; Molecular Function GO:0005622; intracellular; Cellular Component GO:0006508; proteolysis; Biological Process GO:0042981; regulation of apoptosis; Biological Process	K12799 PYCARD, ASC; apoptosis-associated speck-like protein containing a CARD K12799 Organismal Systems; Immune System; NOD-like receptor signaling pathway [PATH:ko04621] Organismal Systems; Immune System; Cytosolic DNA-sensing pathway [PATH:ko04623] Human Diseases; Infectious Diseases; Salmonella infection [PATH:ko05132] Human Diseases; Infectious Diseases; Pertussis [PATH:ko05133] Human Disease…	Apoptosis-associated speck-like protein containing a CARD	ASC
chr11	Lcro_GLEAN_10016028	1278878	1280186	1	-	IPR000276; GPCR, rhodopsin-like, 7TM IPR000810; Cannabinoid receptor, type 1 IPR002230; Cannabinoid receptor IPR017452; GPCR, rhodopsin-like superfamily	GO:0004949; cannabinoid receptor activity; Molecular Function GO:0007186; G-protein coupled receptor protein signaling pathway; Biological Process GO:0016021; integral to membrane; Cellular Component	K04278 CNR2; cannabinoid receptor 2 (macrophage) K04278 Environmental Information Processing; Signaling Molecules and Interaction; G protein-coupled receptors [BR:ko04030] Environmental Information Processing; Signaling Molecules and Interaction; Enzyme-linked receptors [BR:ko01020] Environmental Information Processing; Signaling Molecules and Interaction; Cytokine receptors [BR:ko04050] Environm…	Cannabinoid receptor 2	Uncharacterized protein (Fragment)
chr11	Lcro_GLEAN_10019259	1819332	1825490	0.997884	+	IPR001370; Baculoviral inhibition of apoptosis protein repeat	GO:0005622; intracellular; Cellular Component	K08731 BIRC5; baculoviral IAP repeat-containing 5 K08731 Human Diseases; Cancers; Pathways in cancer [PATH:ko05200] Human Diseases; Cancers; Colorectal cancer [PATH:ko05210]	Baculoviral IAP repeat-containing protein 5.1-A	Survivin
chr11	Lcro_GLEAN_10019262	1853178	1877972	0.810419	-	IPR001073; Complement C1q protein	NA	NA	Complement C1q-like protein 3	Chromosome 9 SCAF14991, whole genome shotgun sequence. (Fragment)
chr11	Lcro_GLEAN_10019275	2106063	2113347	0.661828	-	IPR000198; Rho GTPase-activating protein domain IPR001060; Fps/Fes/Fer/CIP4 homology	GO:0005622; intracellular; Cellular Component GO:0007165; signal transduction; Biological Process	NA	Rho GTPase-activating protein 4	Uncharacterized protein
chr11	Lcro_GLEAN_10019277	2120340	2125853	0.999242	+	IPR001206; Diacylglycerol kinase, catalytic domain	GO:0004143; diacylglycerol kinase activity; Molecular Function GO:0007205; activation of protein kinase C activity by G-protein coupled receptor protein signaling pathway; Biological Process	K04715 E2.7.1.138, CERK; ceramide kinase [EC:2.7.1.138] [EC:2.7.1.138] Metabolism; Lipid Metabolism; Sphingolipid metabolism [PATH:ko00600]	Ceramide kinase	Zgc:158263
chr11	Lcro_GLEAN_10019286	2256200	2266471	0.999137	-	IPR000980; SH2 motif IPR001217; STAT transcription factor, core IPR013799; STAT transcription factor, protein interaction IPR013800; STAT transcription factor, all-alpha IPR013801; STAT transcription factor, DNA-binding	GO:0003700; sequence-specific DNA binding transcription factor activity; Molecular Function GO:0004871; signal transducer activity; Molecular Function GO:0005515; protein binding; Molecular Function GO:0005634; nucleus; Cellular Component GO:0006355; regulation of transcription, DNA-dependent; Biological Process GO:0007165; signal transduction; Biological Process	K11225 STAT6; signal transducer and activator of transcription 6 K11225 Environmental Information Processing; Signal Transduction; Jak-STAT signaling pathway [PATH:ko04630]	Signal transducer and activator of transcription 6	Signal transducer and activator of transcription 6
chr11	Lcro_GLEAN_10019303	2523868	2526825	0.983964	+	IPR008677; MRVI1	NA	NA	Lymphoid-restricted membrane protein	Chromosome undetermined SCAF3346, whole genome shotgun sequence
chr11	Lcro_GLEAN_10019313	2744009	2746769	1	+	IPR000276; GPCR, rhodopsin-like, 7TM IPR001068; Adenosine A1 receptor IPR001634; Adenosine receptor IPR017452; GPCR, rhodopsin-like superfamily	GO:0001609; adenosine receptor activity, G-protein coupled; Molecular Function GO:0007186; G-protein coupled receptor protein signaling pathway; Biological Process GO:0016021; integral to membrane; Cellular Component	K04265 ADORA1; adenosine A1 receptor K04265 Environmental Information Processing; Signaling Molecules and Interaction; G protein-coupled receptors [BR:ko04030] Environmental Information Processing; Signaling Molecules and Interaction; Enzyme-linked receptors [BR:ko01020] Environmental Information Processing; Signaling Molecules and Interaction; Cytokine receptors [BR:ko04050] Environmental Inform…	Adenosine receptor A1	Uncharacterized protein (Fragment)
chr11	Lcro_GLEAN_10017364	3234789	3260297	0.929952	+	IPR000719; Protein kinase, catalytic domain IPR002290; Serine/threonine-protein kinase domain IPR017442; Serine/threonine-protein kinase-like domain IPR020635; Tyrosine-protein kinase, catalytic domain	GO:0004672; protein kinase activity; Molecular Function GO:0004674; protein serine/threonine kinase activity; Molecular Function GO:0005524; ATP binding; Molecular Function GO:0006468; protein phosphorylation; Biological Process	NA	Mitogen-activated protein kinase kinase kinase 3	Uncharacterized protein (Fragment)
chr11	Lcro_GLEAN_10017383	3655600	3661687	1	-	IPR000219; Dbl homology (DH) domain IPR001849; Pleckstrin homology domain IPR015721; Rho GTP exchange factor	GO:0005089; Rho guanyl-nucleotide exchange factor activity; Molecular Function GO:0005515; protein binding; Molecular Function GO:0005622; intracellular; Cellular Component GO:0035023; regulation of Rho protein signal transduction; Biological Process	NA	Rho guanine nucleotide exchange factor 3	Uncharacterized protein
chr11	Lcro_GLEAN_10017388	3740589	3756030	0.957279	-	IPR000301; Tetraspanin, subgroup IPR018499; Tetraspanin	GO:0016021; integral to membrane; Cellular Component	NA	CD9 antigen	Uncharacterized protein (Fragment)
chr11	Lcro_GLEAN_10000686	4930695	4951195	0.719033	-	IPR000038; Cell division/GTP binding protein IPR003599; Immunoglobulin subtype IPR006612; Zinc finger, C2CH-type IPR007110; Immunoglobulin-like IPR013106; Immunoglobulin V-set	GO:0003676; nucleic acid binding; Molecular Function GO:0005515; protein binding; Molecular Function GO:0005525; GTP binding; Molecular Function GO:0007049; cell cycle; Biological Process	NA	Immunoglobulin superfamily member 21	Uncharacterized protein (Fragment)
chr11	Lcro_GLEAN_10026009	5178116	5240748	0.670267	+	IPR000233; Cadherin, cytoplasmic domain IPR002126; Cadherin IPR009124; Desmocollin IPR014868; Cadherin prodomain-like	GO:0005509; calcium ion binding; Molecular Function GO:0007155; cell adhesion; Biological Process GO:0007156; homophilic cell adhesion; Biological Process GO:0016020; membrane; Cellular Component GO:0016021; integral to membrane; Cellular Component	K06797 CDH4; cadherin 4, type 1, R-cadherin K06797 Environmental Information Processing; Signaling Molecules and Interaction; Cell adhesion molecules (CAMs) [PATH:ko04514]	Cadherin-4	Uncharacterized protein (Fragment)
chr11	Lcro_GLEAN_10026014	5301436	5310697	0.994502	-	IPR002126; Cadherin	GO:0005509; calcium ion binding; Molecular Function GO:0007156; homophilic cell adhesion; Biological Process GO:0016020; membrane; Cellular Component	NA	Cadherin-2	Uncharacterized protein
chr11	Lcro_GLEAN_10026018	5370215	5375009	1	-	IPR001346; Interferon regulatory factor IPR019471; Interferon regulatory factor-3	GO:0003700; sequence-specific DNA binding transcription factor activity; Molecular Function GO:0005634; nucleus; Cellular Component GO:0006355; regulation of transcription, DNA-dependent; Biological Process	NA	Interferon regulatory factor 4	Interferon regulatory factor 10
chr11	Lcro_GLEAN_10026019	5378308	5401686	0.939447	-	IPR001111; Transforming growth factor-beta, N-terminal IPR001839; Transforming growth factor-beta, C-terminal IPR015615; Transforming growth factor-beta-related	GO:0008083; growth factor activity; Molecular Function GO:0040007; growth; Biological Process	K16621	Bone morphogenetic protein 7	Uncharacterized protein (Fragment)
chr11	Lcro_GLEAN_10026034	5681024	5686936	0.980303	+	IPR001073; Complement C1q protein	NA	NA	Complement C1q and tumor necrosis factor-related protein 9	Uncharacterized protein
chr11	Lcro_GLEAN_10026044	5914026	5920288	1	+	IPR013568; SEFIR	NA	K05168	Interleukin-17 receptor E	Uncharacterized protein
chr11	Lcro_GLEAN_10026045	5923573	5931083	0.472451	+	IPR013568; SEFIR	NA	K05166	Interleukin-17 receptor C	Uncharacterized protein (Fragment)
chr11	Lcro_GLEAN_10026048	5944405	5963271	0.324063	+	IPR001680; WD40 repeat IPR017986; WD40-repeat-containing domain IPR019781; WD40 repeat, subgroup IPR019782; WD40 repeat 2	GO:0005515; protein binding; Molecular Function	NA	Intraflagellar transport protein 122 homolog	Uncharacterized protein
chr11	Lcro_GLEAN_10026112	8233414	8239703	1	+	IPR001806; Ras GTPase IPR002041; Ran GTPase IPR003577; Ras small GTPase, Ras type IPR003578; Small GTPase, Rho type IPR003579; Ras small GTPase, Rab type IPR013753; Ras	GO:0003924; GTPase activity; Molecular Function GO:0005525; GTP binding; Molecular Function GO:0005622; intracellular; Cellular Component GO:0006886; intracellular protein transport; Biological Process GO:0006913; nucleocytoplasmic transport; Biological Process GO:0007165; signal transduction; Biological Process GO:0007264; small GTPase mediated signal transduction; Biological Process GO:0015031;…	K07861 RAC3; Ras-related C3 botulinum toxin substrate 3 K07861 Environmental Information Processing; Signal Transduction; Two-component system [BR:ko02022] Environmental Information Processing; Signal Transduction; MAPK signaling pathway [PATH:ko04010] Environmental Information Processing; Signal Transduction; Wnt signaling pathway [PATH:ko04310] Environmental Information Processing; Signal Trans…	Ras-related C3 botulinum toxin substrate 1	Uncharacterized protein
chr11	Lcro_GLEAN_10026113	8242957	8258742	0.324354	-	IPR002198; Short-chain dehydrogenase/reductase SDR IPR002347; Glucose/ribitol dehydrogenase IPR003378; Fringe-like	GO:0008152; metabolic process; Biological Process GO:0016020; membrane; Cellular Component GO:0016491; oxidoreductase activity; Molecular Function GO:0016757; transferase activity, transferring glycosyl groups; Molecular Function GO:0055114; oxidation-reduction process; Biological Process	K05948 FNG; fringe [EC:2.4.1.222] [EC:2.4.1.222] Metabolism; Glycan Biosynthesis and Metabolism; Other types of O-glycan biosynthesis [PATH:ko00514] Environmental Information Processing; Signal Transduction; Notch signaling pathway [PATH:ko04330]	Beta-1,3-N-acetylglucosaminyltransferase radical fringe	Uncharacterized protein
chr11	Lcro_GLEAN_10026117	8322035	8338772	0.668889	+	IPR000980; SH2 motif IPR001217; STAT transcription factor, core IPR013799; STAT transcription factor, protein interaction IPR013800; STAT transcription factor, all-alpha IPR013801; STAT transcription factor, DNA-binding	GO:0003700; sequence-specific DNA binding transcription factor activity; Molecular Function GO:0004871; signal transducer activity; Molecular Function GO:0005515; protein binding; Molecular Function GO:0005634; nucleus; Cellular Component GO:0006355; regulation of transcription, DNA-dependent; Biological Process GO:0007165; signal transduction; Biological Process	K11224 STAT5B; signal transducer and activator of transcription 5B K11224 Environmental Information Processing; Signal Transduction; ErbB signaling pathway [PATH:ko04012] Environmental Information Processing; Signal Transduction; Jak-STAT signaling pathway [PATH:ko04630] Organismal Systems; Immune System; Chemokine signaling pathway [PATH:ko04062] Human Diseases; Cancers; Pathways in cancer [PATH…	Signal transducer and activator of transcription 5B	Uncharacterized protein
chr11	Lcro_GLEAN_10004631	8788241	8788719	0.735663	+	IPR003596; Immunoglobulin V-set, subgroup IPR003599; Immunoglobulin subtype IPR007110; Immunoglobulin-like IPR013106; Immunoglobulin V-set	GO:0005515; protein binding; Molecular Function	NA	Ig kappa chain V-IV region B17	Uncharacterized protein
chr11	Lcro_GLEAN_10004635	8817142	8818115	1	+	IPR003597; Immunoglobulin C1-set IPR007110; Immunoglobulin-like	GO:0005515; protein binding; Molecular Function	NA	Immunoglobulin lambda-like polypeptide 5	Uncharacterized protein (Fragment)
chr11	Lcro_GLEAN_10004634	8816061	8823280	0.615872	-	IPR003596; Immunoglobulin V-set, subgroup IPR003599; Immunoglobulin subtype IPR007110; Immunoglobulin-like IPR013106; Immunoglobulin V-set	GO:0005515; protein binding; Molecular Function	NA	Ig kappa chain V-IV region B17	Uncharacterized protein
chr12	Lcro_GLEAN_10020952	22185	44897	0.999761	+	IPR000756; Diacylglycerol kinase, accessory domain IPR001206; Diacylglycerol kinase, catalytic domain IPR001478; PDZ/DHR/GF IPR002048; Calcium-binding EF-hand IPR002219; Protein kinase C-like, phorbol ester/diacylglycerol binding IPR018249; EF-HAND 2	GO:0004143; diacylglycerol kinase activity; Molecular Function GO:0005509; calcium ion binding; Molecular Function GO:0005515; protein binding; Molecular Function GO:0007205; activation of protein kinase C activity by G-protein coupled receptor protein signaling pathway; Biological Process GO:0035556; intracellular signal transduction; Biological Process	NA	Diacylglycerol kinase alpha	Uncharacterized protein
chr12	Lcro_GLEAN_10020957	89940	97747	0.88766	-	IPR000301; Tetraspanin, subgroup IPR018499; Tetraspanin	GO:0016021; integral to membrane; Cellular Component	K06497 CD63, MLA1; CD63 antigen K06497 Cellular Processes; Transport and Catabolism; Lysosome [PATH:ko04142]	CD63 antigen	CD63 (Fragment)
chr12	Lcro_GLEAN_10020976	318264	319184	0.999709	+	IPR004827; Basic-leucine zipper (bZIP) transcription factor IPR011700; Basic leucine zipper	GO:0003700; sequence-specific DNA binding transcription factor activity; Molecular Function GO:0006355; regulation of transcription, DNA-dependent; Biological Process GO:0043565; sequence-specific DNA binding; Molecular Function GO:0046983; protein dimerization activity; Molecular Function	K10048 CEBPB; CCAAT/enhancer binding protein (C/EBP), beta K10048 Human Diseases; Cancers; Transcriptional misregulation in cancers [PATH:ko05202] Human Diseases; Infectious Diseases; Tuberculosis [PATH:ko05152]	CCAAT/enhancer-binding protein beta	Uncharacterized protein
chr12	Lcro_GLEAN_10021031	1120167	1122153	0.999015	+	IPR001368; TNFR/CD27/30/40/95 cysteine-rich region	GO:0004872; receptor activity; Molecular Function	K05146 TNFRSF9, CD137; tumor necrosis factor receptor superfamily member 9 K05146 Environmental Information Processing; Signaling Molecules and Interaction; Cytokine-cytokine receptor interaction [PATH:ko04060]	Tumor necrosis factor receptor superfamily member 9	Chromosome 9 SCAF14729, whole genome shotgun sequence
chr12	Lcro_GLEAN_10021039	1449998	1455037	0.93471	-	IPR001806; Ras GTPase IPR003578; Small GTPase, Rho type IPR013753; Ras	GO:0005525; GTP binding; Molecular Function GO:0005622; intracellular; Cellular Component GO:0007264; small GTPase mediated signal transduction; Biological Process	K04393 CDC42; cell division control protein 42 K04393 Environmental Information Processing; Signal Transduction; Two-component system [BR:ko02022] Environmental Information Processing; Signal Transduction; MAPK signaling pathway [PATH:ko04010] Environmental Information Processing; Signal Transduction; MAPK signaling pathway - yeast [PATH:ko04011] Environmental Information Processing; Signal Trans…	Cell division control protein 42 homolog	Chromosome 9 SCAF14729, whole genome shotgun sequence
chr12	Lcro_GLEAN_10021060	1691564	1705740	0.499621	-	IPR001766; Transcription factor, fork head	GO:0003700; sequence-specific DNA binding transcription factor activity; Molecular Function GO:0006355; regulation of transcription, DNA-dependent; Biological Process GO:0043565; sequence-specific DNA binding; Molecular Function	NA	Forkhead box protein P1-B	Uncharacterized protein
chr12	Lcro_GLEAN_10021067	1819530	1840917	0.00231905	-	IPR003598; Immunoglobulin subtype 2 IPR003599; Immunoglobulin subtype IPR003961; Fibronectin, type III IPR007110; Immunoglobulin-like IPR013098; Immunoglobulin I-set	GO:0005515; protein binding; Molecular Function	NA	Immunoglobulin-like and fibronectin type III domain-containing protein 1	Uncharacterized protein (Fragment)
chr12	Lcro_GLEAN_10002890	2101231	2115316	0.0567136	+	IPR003598; Immunoglobulin subtype 2 IPR003599; Immunoglobulin subtype IPR003961; Fibronectin, type III IPR007110; Immunoglobulin-like IPR013098; Immunoglobulin I-set	GO:0005515; protein binding; Molecular Function	NA	Immunoglobulin-like and fibronectin type III domain-containing protein 1	Uncharacterized protein (Fragment)
chr12	Lcro_GLEAN_10005251	2151897	2196765	0.51024	-	IPR001356; Homeobox IPR001523; Paired box protein, N-terminal IPR022106; Paired box protein 7	GO:0003677; DNA binding; Molecular Function GO:0003700; sequence-specific DNA binding transcription factor activity; Molecular Function GO:0006355; regulation of transcription, DNA-dependent; Biological Process GO:0043565; sequence-specific DNA binding; Molecular Function GO:0045449; regulation of transcription; Biological Process	K09381	Paired box protein Pax-7	Paired box protein 7
chr12	Lcro_GLEAN_10005258	2330647	2341248	0.999912	+	IPR001766; Transcription factor, fork head	GO:0003700; sequence-specific DNA binding transcription factor activity; Molecular Function GO:0006355; regulation of transcription, DNA-dependent; Biological Process GO:0043565; sequence-specific DNA binding; Molecular Function	NA	Forkhead box protein P1	Foxp3-like protein
chr12	Lcro_GLEAN_10005265	2420908	2431470	0.999803	-	IPR001060; Fps/Fes/Fer/CIP4 homology IPR001452; Src homology-3 domain	GO:0005515; protein binding; Molecular Function	NA	Protein kinase C and casein kinase substrate in neurons protein 1	Uncharacterized protein
chr12	Lcro_GLEAN_10002368	2717142	2734421	0.999709	-	IPR001875; Death effector IPR002048; Calcium-binding EF-hand IPR007053; NC IPR018248; EF-hand IPR018249; EF-HAND 2	GO:0005509; calcium ion binding; Molecular Function GO:0005515; protein binding; Molecular Function GO:0042981; regulation of apoptosis; Biological Process	NA	Death effector domain-containing protein	Uncharacterized protein
chr12	Lcro_GLEAN_10016955	4595810	4692667	0.999128	-	IPR000270; Phox/Bem1p IPR000719; Protein kinase, catalytic domain IPR000961; AGC-kinase, C-terminal IPR002219; Protein kinase C-like, phorbol ester/diacylglycerol binding IPR002290; Serine/threonine-protein kinase domain IPR017442; Serine/threonine-protein kinase-like domain IPR017892; Protein kinase, C-terminal IPR020454; Diacylglycerol/phorbol-ester binding IPR020635; Tyrosine-protein kinase, c…	GO:0004672; protein kinase activity; Molecular Function GO:0004674; protein serine/threonine kinase activity; Molecular Function GO:0005515; protein binding; Molecular Function GO:0005524; ATP binding; Molecular Function GO:0006468; protein phosphorylation; Biological Process GO:0035556; intracellular signal transduction; Biological Process	K06069 APKC; atypical protein kinase C [EC:2.7.11.13] [EC:2.7.11.13] Cellular Processes; Transport and Catabolism; Endocytosis [PATH:ko04144] Cellular Processes; Cell Communication; Tight junction [PATH:ko04530] Organismal Systems; Endocrine System; Insulin signaling pathway [PATH:ko04910]	Protein kinase C zeta type	Uncharacterized protein (Fragment)
chr12	Lcro_GLEAN_10016956	4698706	4700788	0.999318	-	IPR001368; TNFR/CD27/30/40/95 cysteine-rich region IPR008063; Fas receptor	GO:0004872; receptor activity; Molecular Function GO:0004888; transmembrane receptor activity; Molecular Function GO:0006915; apoptosis; Biological Process GO:0006955; immune response; Biological Process GO:0007165; signal transduction; Biological Process GO:0016020; membrane; Cellular Component	NA	Tumor necrosis factor receptor superfamily member 14	Novel protein (Zgc:153631)
chr12	Lcro_GLEAN_10016957	4708779	4719945	1	-	IPR001368; TNFR/CD27/30/40/95 cysteine-rich region IPR008063; Fas receptor	GO:0004872; receptor activity; Molecular Function GO:0004888; transmembrane receptor activity; Molecular Function GO:0006915; apoptosis; Biological Process GO:0006955; immune response; Biological Process GO:0007165; signal transduction; Biological Process GO:0016020; membrane; Cellular Component	K05152 TNFRSF14, HVEM; tumor necrosis factor receptor superfamily member 14 K05152 Environmental Information Processing; Signaling Molecules and Interaction; Cytokine-cytokine receptor interaction [PATH:ko04060] Human Diseases; Infectious Diseases; Herpes simplex infection [PATH:ko05168]	Tumor necrosis factor receptor superfamily member 14	Tumor necrosis factor receptor superfamily member 14
chr12	Lcro_GLEAN_10016974	4971508	4984654	1	-	IPR021063; NF-kappa-B essential modulator NEMO, N-terminal	NA	K07210 IKBKG, IKKG, NEMO; inhibitor of nuclear factor kappa-B kinase subunit gamma K07210 Environmental Information Processing; Signal Transduction; Two-component system [BR:ko02022] Environmental Information Processing; Signal Transduction; MAPK signaling pathway [PATH:ko04010] Cellular Processes; Cell Growth and Death; Apoptosis [PATH:ko04210] Organismal Systems; Immune System; Toll-like recept…	NF-kappa-B essential modulator	Uncharacterized protein
chr12	Lcro_GLEAN_10023366	5747697	5755975	0.562698	-	IPR000712; Apoptosis regulator, Bcl-2, BH IPR002475; Apoptosis regulator, Bcl2-like IPR013279; Apoptosis regulator, Bcl-X	GO:0042981; regulation of apoptosis; Biological Process	K02163	Bcl-2-like protein 1	Bcl2
chr12	Lcro_GLEAN_10023380	5946095	5974000	0.617326	+	IPR002049; EGF-like, laminin IPR006210; Epidermal growth factor-like IPR008211; Laminin, N-terminal IPR013015; Laminin IV	GO:0005515; protein binding; Molecular Function	NA	Laminin subunit beta-2	Uncharacterized protein (Fragment)
chr12	Lcro_GLEAN_10023381	5982016	6022991	0.991813	+	IPR002049; EGF-like, laminin IPR006210; Epidermal growth factor-like IPR008211; Laminin, N-terminal IPR013015; Laminin IV	GO:0005515; protein binding; Molecular Function	K06243 LAMB2; laminin, beta 2 K06243 Environmental Information Processing; Signaling Molecules and Interaction; Cytokines [BR:ko04052] Environmental Information Processing; Signaling Molecules and Interaction; ECM-receptor interaction [PATH:ko04512] Cellular Processes; Cell Communication; Focal adhesion [PATH:ko04510] Human Diseases; Cancers; Pathways in cancer [PATH:ko05200] Human Diseases; Canc…	Laminin subunit beta-2	Uncharacterized protein (Fragment)
chr12	Lcro_GLEAN_10023386	6342226	6370566	0.999007	+	IPR008677; MRVI1	NA	NA	Lymphoid-restricted membrane protein	Lymphoid-restricted membrane protein
chr12	Lcro_GLEAN_10023391	6428113	6457711	0.999709	+	IPR000008; C2 calcium-dependent membrane targeting IPR000719; Protein kinase, catalytic domain IPR000961; AGC-kinase, C-terminal IPR002219; Protein kinase C-like, phorbol ester/diacylglycerol binding IPR002290; Serine/threonine-protein kinase domain IPR017442; Serine/threonine-protein kinase-like domain IPR017892; Protein kinase, C-terminal IPR018029; C2 membrane targeting protein IPR020454; Diac…	GO:0004672; protein kinase activity; Molecular Function GO:0004674; protein serine/threonine kinase activity; Molecular Function GO:0005515; protein binding; Molecular Function GO:0005524; ATP binding; Molecular Function GO:0006468; protein phosphorylation; Biological Process GO:0035556; intracellular signal transduction; Biological Process	K02677 CPKC; classical protein kinase C [EC:2.7.11.13] [EC:2.7.11.13] Environmental Information Processing; Signal Transduction; Two-component system [BR:ko02022] Environmental Information Processing; Signal Transduction; MAPK signaling pathway [PATH:ko04010] Environmental Information Processing; Signal Transduction; MAPK signaling pathway - yeast [PATH:ko04011] Environmental Information Processi…	Protein kinase C alpha type	Protein kinase C
chr12	Lcro_GLEAN_10023393	6473954	6493863	0.968795	-	IPR000904; SEC7-like IPR001849; Pleckstrin homology domain	GO:0005086; ARF guanyl-nucleotide exchange factor activity; Molecular Function GO:0005515; protein binding; Molecular Function GO:0005622; intracellular; Cellular Component GO:0032012; regulation of ARF protein signal transduction; Biological Process	NA	Cytohesin-3	Chromosome 3 SCAF15037, whole genome shotgun sequence. (Fragment)
chr12	Lcro_GLEAN_10023395	6525205	6529722	1	+	IPR001806; Ras GTPase IPR003577; Ras small GTPase, Ras type IPR003578; Small GTPase, Rho type IPR003579; Ras small GTPase, Rab type IPR013753; Ras	GO:0005525; GTP binding; Molecular Function GO:0005622; intracellular; Cellular Component GO:0007264; small GTPase mediated signal transduction; Biological Process GO:0015031; protein transport; Biological Process	K04392 RAC1; Ras-related C3 botulinum toxin substrate 1 K04392 Environmental Information Processing; Signal Transduction; Two-component system [BR:ko02022] Environmental Information Processing; Signal Transduction; MAPK signaling pathway [PATH:ko04010] Environmental Information Processing; Signal Transduction; Wnt signaling pathway [PATH:ko04310] Environmental Information Processing; Signal Trans…	Ras-related C3 botulinum toxin substrate 1	Uncharacterized protein (Fragment)
chr12	Lcro_GLEAN_10023427	7090681	7114689	0.994557	-	IPR002035; von Willebrand factor, type A IPR008399; Anthrax toxin receptor, C-terminal IPR008400; Anthrax toxin receptor, extracellular	GO:0004872; receptor activity; Molecular Function GO:0005515; protein binding; Molecular Function GO:0016021; integral to membrane; Cellular Component	NA	Anthrax toxin receptor 1	Uncharacterized protein (Fragment)
chr12	Lcro_GLEAN_10023431	7147638	7150255	0.999527	-	IPR001111; Transforming growth factor-beta, N-terminal IPR001839; Transforming growth factor-beta, C-terminal IPR002405; Inhibin, alpha subunit IPR015615; Transforming growth factor-beta-related	GO:0005576; extracellular region; Cellular Component GO:0008083; growth factor activity; Molecular Function GO:0040007; growth; Biological Process	K05496	Bone morphogenetic protein 3B	Uncharacterized protein
chr12	Lcro_GLEAN_10023433	7233861	7251993	0.994087	+	IPR000719; Protein kinase, catalytic domain IPR002290; Serine/threonine-protein kinase domain IPR008351; JNK MAP kinase IPR017442; Serine/threonine-protein kinase-like domain IPR020635; Tyrosine-protein kinase, catalytic domain	GO:0004672; protein kinase activity; Molecular Function GO:0004674; protein serine/threonine kinase activity; Molecular Function GO:0004707; MAP kinase activity; Molecular Function GO:0005524; ATP binding; Molecular Function GO:0006468; protein phosphorylation; Biological Process	K04440 JNK; c-Jun N-terminal kinase [EC:2.7.11.24] [EC:2.7.11.24] Genetic Information Processing; Folding, Sorting and Degradation; Protein processing in endoplasmic reticulum [PATH:ko04141] Environmental Information Processing; Signal Transduction; Two-component system [BR:ko02022] Environmental Information Processing; Signal Transduction; MAPK signaling pathway [PATH:ko04010] Environmental Info…	Mitogen-activated protein kinase 8B	Uncharacterized protein (Fragment)
chr12	Lcro_GLEAN_10023438	7358978	7360881	0.999624	-	IPR001111; Transforming growth factor-beta, N-terminal IPR001839; Transforming growth factor-beta, C-terminal IPR015615; Transforming growth factor-beta-related	GO:0008083; growth factor activity; Molecular Function GO:0040007; growth; Biological Process	NA	Bone morphogenetic protein 2	Uncharacterized protein (Fragment)
chr12	Lcro_GLEAN_10023447	7607953	7616675	0.99663	+	IPR001876; Zinc finger, RanBP2-type IPR003892; Ubiquitin system component Cue	GO:0005515; protein binding; Molecular Function GO:0005622; intracellular; Cellular Component GO:0008270; zinc ion binding; Molecular Function	K04404 MAP3K7IP2, TAB2; TAK1-binding protein 2 K04404 Environmental Information Processing; Signal Transduction; Two-component system [BR:ko02022] Environmental Information Processing; Signal Transduction; MAPK signaling pathway [PATH:ko04010] Organismal Systems; Immune System; Toll-like receptor signaling pathway [PATH:ko04620] Organismal Systems; Immune System; NOD-like receptor signaling pathw…	TGF-beta-activated kinase 1 and MAP3K7-binding protein 2	Uncharacterized protein
chr12	Lcro_GLEAN_10017662	9183350	9187809	0.99963	+	IPR001140; ABC transporter, transmembrane domain IPR003439; ABC transporter-like IPR003593; ATPase, AAA+ type, core IPR017940; ABC transporter, integral membrane type 1	GO:0000166; nucleotide binding; Molecular Function GO:0005524; ATP binding; Molecular Function GO:0006810; transport; Biological Process GO:0016021; integral to membrane; Cellular Component GO:0016887; ATPase activity; Molecular Function GO:0017111; nucleoside-triphosphatase activity; Molecular Function GO:0042626; ATPase activity, coupled to transmembrane movement of substances; Molecular Functi…	K05654 ABCB3, TAP2; ATP-binding cassette, subfamily B (MDR/TAP), member 3 K05654 Environmental Information Processing; Membrane Transport; Transporters [BR:ko02000] Environmental Information Processing; Membrane Transport; Solute carrier family [BR:ko02001] Environmental Information Processing; Membrane Transport; ABC transporters [PATH:ko02010] Cellular Processes; Transport and Catabolism; Phago…	Antigen peptide transporter 2	Transporter-associated with antigen processing 2
chr12	Lcro_GLEAN_10025610	11097626	11108274	0.167367	-	IPR001073; Complement C1q protein	NA	NA	Complement C1q tumor necrosis factor-related protein 3	C1q-like-protein
chr12	Lcro_GLEAN_10025611	11120530	11122996	1	+	IPR022158; Inositol phosphatase	NA	NA	Tumor protein p63-regulated gene 1-like protein	Uncharacterized protein
chr12	Lcro_GLEAN_10025624	11411634	11462850	0.567024	+	IPR000219; Dbl homology (DH) domain IPR001452; Src homology-3 domain IPR001849; Pleckstrin homology domain IPR002110; Ankyrin repeat IPR003124; Actin-binding WH2 IPR020683; Ankyrin repeat-containing domain	GO:0005089; Rho guanyl-nucleotide exchange factor activity; Molecular Function GO:0005515; protein binding; Molecular Function GO:0005622; intracellular; Cellular Component GO:0035023; regulation of Rho protein signal transduction; Biological Process	NA	Rho guanine nucleotide exchange factor 16	Chromosome 9 SCAF14710, whole genome shotgun sequence. (Fragment)
chr12	Lcro_GLEAN_10025666	12063961	12064701	1	+	IPR013568; SEFIR	NA	K05165 IL17RB, IL17RH1; interleukin 17 receptor B K05165 Environmental Information Processing; Signaling Molecules and Interaction; Cytokine-cytokine receptor interaction [PATH:ko04060]	Interleukin-17 receptor B	Uncharacterized protein
chr12	Lcro_GLEAN_10025672	12109963	12118045	0.562413	+	IPR001611; Leucine-rich repeat IPR001870; B302/SPRY domain IPR003590; Leucine-rich repeat, ribonuclease inhibitor subtype IPR003877; SPla/RYanodine receptor SPRY IPR003879; Butyrophylin-like IPR007111; NACHT nucleoside triphosphatase IPR018355; SPla/RYanodine receptor subgroup	GO:0005515; protein binding; Molecular Function	NA	Protein NLRC3	Si:dkey-240n22.1
chr12	Lcro_GLEAN_10015865	12575025	12576923	0.314911	+	IPR003596; Immunoglobulin V-set, subgroup IPR003599; Immunoglobulin subtype IPR007110; Immunoglobulin-like IPR013106; Immunoglobulin V-set	GO:0005515; protein binding; Molecular Function	NA	Ig kappa chain V-IV region (Fragment)	Uncharacterized protein
chr12	Lcro_GLEAN_10015866	12578502	12607617	0.997286	+	IPR001039; MHC class I, alpha chain, alpha1/alpha2 IPR003597; Immunoglobulin C1-set IPR007110; Immunoglobulin-like	GO:0005515; protein binding; Molecular Function GO:0006955; immune response; Biological Process GO:0016020; membrane; Cellular Component GO:0019882; antigen processing and presentation; Biological Process GO:0042612; MHC class I protein complex; Cellular Component	NA	Major histocompatibility complex class I-related gene protein	MHC class II antigen alpha chain
chr12	Lcro_GLEAN_10015870	12671088	12683146	0.990902	-	IPR001039; MHC class I, alpha chain, alpha1/alpha2 IPR003597; Immunoglobulin C1-set IPR007110; Immunoglobulin-like	GO:0005515; protein binding; Molecular Function GO:0006955; immune response; Biological Process GO:0016020; membrane; Cellular Component GO:0019882; antigen processing and presentation; Biological Process GO:0042612; MHC class I protein complex; Cellular Component	K06751 MHC1; major histocompatibility complex, class I K06751 Environmental Information Processing; Signaling Molecules and Interaction; Cell adhesion molecules (CAMs) [PATH:ko04514] Cellular Processes; Transport and Catabolism; Endocytosis [PATH:ko04144] Cellular Processes; Transport and Catabolism; Phagosome [PATH:ko04145] Organismal Systems; Immune System; Natural killer cell mediated cytotoxi…	Major histocompatibility complex class I-related gene protein	MHC class II antigen alpha chain
chr12	Lcro_GLEAN_10015872	12700668	12707227	0.636564	-	IPR001039; MHC class I, alpha chain, alpha1/alpha2 IPR003597; Immunoglobulin C1-set IPR007110; Immunoglobulin-like	GO:0005515; protein binding; Molecular Function GO:0006955; immune response; Biological Process GO:0016020; membrane; Cellular Component GO:0019882; antigen processing and presentation; Biological Process GO:0042612; MHC class I protein complex; Cellular Component	NA	Major histocompatibility complex class I-related gene protein	MHC class II antigen alpha chain
chr12	Lcro_GLEAN_10015874	12711631	12722127	0.475032	-	IPR001039; MHC class I, alpha chain, alpha1/alpha2 IPR003597; Immunoglobulin C1-set	GO:0006955; immune response; Biological Process GO:0016020; membrane; Cellular Component GO:0019882; antigen processing and presentation; Biological Process GO:0042612; MHC class I protein complex; Cellular Component	NA	Major histocompatibility complex class I-related gene protein	MHC class II antigen alpha chain
chr12	Lcro_GLEAN_10015892	13371676	13374234	1	+	IPR001309; Peptidase C14, ICE, catalytic subunit p20 IPR001315; Caspase Recruitment IPR002138; Peptidase C14, caspase non-catalytic subunit p10 IPR002398; Peptidase C14, caspase precursor p45 IPR011600; Peptidase C14, caspase catalytic IPR015917; Peptidase C14, caspase precursor p45, core	GO:0004197; cysteine-type endopeptidase activity; Molecular Function GO:0005515; protein binding; Molecular Function GO:0005622; intracellular; Cellular Component GO:0006508; proteolysis; Biological Process GO:0006915; apoptosis; Biological Process GO:0008234; cysteine-type peptidase activity; Molecular Function GO:0042981; regulation of apoptosis; Biological Process	K04399 CASP9; caspase 9 [EC:3.4.22.62] [EC:3.4.22.62] Environmental Information Processing; Signal Transduction; VEGF signaling pathway [PATH:ko04370] Cellular Processes; Cell Growth and Death; Apoptosis [PATH:ko04210] Cellular Processes; Cell Growth and Death; p53 signaling pathway [PATH:ko04115] Human Diseases; Cancers; Pathways in cancer [PATH:ko05200] Human Diseases; Cancers; Colorectal cance…	Caspase-9	Caspase
chr13	Lcro_GLEAN_10013263	838241	844013	0.352172	+	IPR000315; Zinc finger, B-box IPR001841; Zinc finger, RING-type IPR001870; B302/SPRY domain IPR003877; SPla/RYanodine receptor SPRY IPR003879; Butyrophylin-like IPR018355; SPla/RYanodine receptor subgroup IPR018957; Zinc finger, C3HC4 RING-type	GO:0005515; protein binding; Molecular Function GO:0005622; intracellular; Cellular Component GO:0008270; zinc ion binding; Molecular Function	NA	Tripartite motif-containing protein 16	Uncharacterized protein
chr13	Lcro_GLEAN_10016772	1086234	1087130	0.99963	-	IPR008653; Immediate early response	NA	NA	Immediate early response gene 5-like protein	Uncharacterized protein
chr13	Lcro_GLEAN_10016801	2163078	2170423	0.481621	+	IPR003597; Immunoglobulin C1-set IPR007110; Immunoglobulin-like	GO:0005515; protein binding; Molecular Function	NA	Immunoglobulin lambda-like polypeptide 5	Uncharacterized protein
chr13	Lcro_GLEAN_10001623	2381550	2386404	1	-	IPR001356; Homeobox IPR020479; Homeobox, eukaryotic	GO:0003700; sequence-specific DNA binding transcription factor activity; Molecular Function GO:0006355; regulation of transcription, DNA-dependent; Biological Process GO:0043565; sequence-specific DNA binding; Molecular Function	K09360	BarH-like 1 homeobox protein	Uncharacterized protein
chr13	Lcro_GLEAN_10019623	2428086	2451351	0.999128	-	IPR003961; Fibronectin, type III IPR010457; Immunoglobulin C2-set-like, ligand-binding	GO:0005515; protein binding; Molecular Function	K05060 IL6ST, GP130; interleukin 6 signal transducer K05060 Environmental Information Processing; Signal Transduction; Jak-STAT signaling pathway [PATH:ko04630] Environmental Information Processing; Signaling Molecules and Interaction; Cytokine-cytokine receptor interaction [PATH:ko04060]	Interleukin-6 receptor subunit beta	Uncharacterized protein (Fragment)
chr13	Lcro_GLEAN_10019626	2472526	2494364	0.596958	-	IPR002558; I/LWEQ IPR015009; Vinculin-binding site-containing domain IPR015710; Talin-related IPR015711; Talin	GO:0003779; actin binding; Molecular Function	NA	Talin-1	Uncharacterized protein (Fragment)
chr13	Lcro_GLEAN_10019627	2494668	2521713	0.525557	-	IPR000299; FERM domain IPR002404; Insulin receptor substrate-1, PTB IPR002558; I/LWEQ IPR015009; Vinculin-binding site-containing domain IPR015224; Talin, central IPR015710; Talin-related IPR015711; Talin IPR018979; FERM, N-terminal IPR019748; FERM central domain IPR019749; Band 4.1 domain	GO:0001726; ruffle; Cellular Component GO:0003779; actin binding; Molecular Function GO:0005158; insulin receptor binding; Molecular Function GO:0005200; structural constituent of cytoskeleton; Molecular Function GO:0005856; cytoskeleton; Cellular Component GO:0005925; focal adhesion; Cellular Component GO:0007016; cytoskeletal anchoring at plasma membrane; Biological Process	NA	Talin-1	Uncharacterized protein (Fragment)
chr13	Lcro_GLEAN_10019633	2665987	2667348	1	-	IPR004827; Basic-leucine zipper (bZIP) transcription factor IPR010533; Vertebrate interleukin-3 regulated transcription factor IPR011700; Basic leucine zipper	GO:0003700; sequence-specific DNA binding transcription factor activity; Molecular Function GO:0005634; nucleus; Cellular Component GO:0006350; transcription; Biological Process GO:0006355; regulation of transcription, DNA-dependent; Biological Process GO:0007623; circadian rhythm; Biological Process GO:0030528; transcription regulator activity; Molecular Function GO:0043565; sequence-specific DN…	K09059	Nuclear factor interleukin-3-regulated protein	Nuclear factor interleukin-3-regulated protein
chr13	Lcro_GLEAN_10019641	2857451	2867282	1	+	IPR001322; Intermediate filament, C-terminal IPR001664; Intermediate filament protein IPR016044; Filament	GO:0005198; structural molecule activity; Molecular Function	K07611	Lamin-B1	Uncharacterized protein
chr13	Lcro_GLEAN_10019649	3048074	3075224	0.926408	+	IPR001356; Homeobox IPR005542; PBX	GO:0003700; sequence-specific DNA binding transcription factor activity; Molecular Function GO:0005634; nucleus; Cellular Component GO:0006355; regulation of transcription, DNA-dependent; Biological Process GO:0043565; sequence-specific DNA binding; Molecular Function	NA	Pre-B-cell leukemia transcription factor 3	Pre-B-cell leukemia transcription factor 3 (Fragment)
chr13	Lcro_GLEAN_10019650	3079110	3097533	0.670085	+	NA	NA	NA	Pre-B-cell leukemia transcription factor 3	Pre-B-cell leukemia transcription factor 3 (Fragment)
chr13	Lcro_GLEAN_10019677	3683154	3688720	0.905705	+	IPR001664; Intermediate filament protein IPR006821; Intermediate filament head, DNA-binding domain IPR016044; Filament	GO:0005198; structural molecule activity; Molecular Function GO:0005882; intermediate filament; Cellular Component	K07606	Vimentin	Uncharacterized protein (Fragment)
chr13	Lcro_GLEAN_10019681	3812751	3813749	0.853957	-	IPR000276; GPCR, rhodopsin-like, 7TM IPR000355; Chemokine receptor IPR017452; GPCR, rhodopsin-like superfamily	GO:0004950; chemokine receptor activity; Molecular Function GO:0007186; G-protein coupled receptor protein signaling pathway; Biological Process GO:0016021; integral to membrane; Cellular Component	NA	Chemokine XC receptor 1	Uncharacterized protein
chr13	Lcro_GLEAN_10019682	3816374	3817432	0.99948	-	IPR000276; GPCR, rhodopsin-like, 7TM IPR000355; Chemokine receptor IPR017452; GPCR, rhodopsin-like superfamily	GO:0004950; chemokine receptor activity; Molecular Function GO:0007186; G-protein coupled receptor protein signaling pathway; Biological Process GO:0016021; integral to membrane; Cellular Component	K04193 XCR1; XC chemokine receptor 1 K04193 Environmental Information Processing; Signaling Molecules and Interaction; Cytokine-cytokine receptor interaction [PATH:ko04060] Organismal Systems; Immune System; Chemokine signaling pathway [PATH:ko04062]	Chemokine XC receptor 1	Uncharacterized protein (Fragment)
chr13	Lcro_GLEAN_10019689	3948350	3960171	0.376893	-	IPR000315; Zinc finger, B-box IPR001841; Zinc finger, RING-type IPR001870; B302/SPRY domain IPR003877; SPla/RYanodine receptor SPRY IPR003879; Butyrophylin-like IPR006574; SPRY-associated IPR018355; SPla/RYanodine receptor subgroup IPR018957; Zinc finger, C3HC4 RING-type	GO:0005515; protein binding; Molecular Function GO:0005622; intracellular; Cellular Component GO:0008270; zinc ion binding; Molecular Function	NA	Tripartite motif-containing protein 16	Uncharacterized protein (Fragment)
chr13	Lcro_GLEAN_10019694	4014761	4049554	1	-	IPR003859; Galactosyltransferase, metazoa	GO:0005975; carbohydrate metabolic process; Biological Process GO:0016757; transferase activity, transferring glycosyl groups; Molecular Function	NA	Beta-1,4-galactosyltransferase 2	Uncharacterized protein
chr13	Lcro_GLEAN_10001063	4071811	4108007	0.999964	-	IPR000195; Rab-GAP/TBC domain IPR006020; Phosphotyrosine interaction domain IPR022164; Kinesin-like	GO:0005097; Rab GTPase activator activity; Molecular Function GO:0005515; protein binding; Molecular Function GO:0005622; intracellular; Cellular Component GO:0032313; regulation of Rab GTPase activity; Biological Process	NA	Rab GTPase-activating protein 1	Uncharacterized protein (Fragment)
chr13	Lcro_GLEAN_10011050	4179542	4185118	1	+	IPR001315; Caspase Recruitment IPR002398; Peptidase C14, caspase precursor p45	GO:0004197; cysteine-type endopeptidase activity; Molecular Function GO:0005515; protein binding; Molecular Function GO:0005622; intracellular; Cellular Component GO:0006508; proteolysis; Biological Process GO:0042981; regulation of apoptosis; Biological Process	NA	NACHT, LRR and PYD domains-containing protein 1	CARD-like protein
chr13	Lcro_GLEAN_10011073	4517457	4518566	0.552075	+	NA	NA	NA	P-selectin glycoprotein ligand 1	P-selectin glycoprotein ligand-1
chr13	Lcro_GLEAN_10011076	4530716	4531738	1	+	IPR000276; GPCR, rhodopsin-like, 7TM IPR000826; Formyl/methionyl peptide receptor IPR017452; GPCR, rhodopsin-like superfamily	GO:0004982; N-formyl peptide receptor activity; Molecular Function GO:0007186; G-protein coupled receptor protein signaling pathway; Biological Process GO:0016021; integral to membrane; Cellular Component	NA	Chemokine-like receptor 1	Uncharacterized protein (Fragment)
chr13	Lcro_GLEAN_10011100	4824708	4825041	1	-	IPR001464; Annexin IPR018502; Annexin repeat	GO:0005509; calcium ion binding; Molecular Function GO:0005544; calcium-dependent phospholipid binding; Molecular Function	NA	Annexin A4	Annexin (Fragment)
chr13	Lcro_GLEAN_10011101	4826542	4834703	0.999707	-	IPR001464; Annexin IPR002391; Annexin, type IV IPR002392; Annexin, type V IPR018502; Annexin repeat	GO:0005509; calcium ion binding; Molecular Function GO:0005544; calcium-dependent phospholipid binding; Molecular Function GO:0050819; negative regulation of coagulation; Biological Process	NA	Annexin A4	Annexin
chr13	Lcro_GLEAN_10011103	4857522	4864279	0.963521	-	IPR002035; von Willebrand factor, type A IPR008400; Anthrax toxin receptor, extracellular	GO:0004872; receptor activity; Molecular Function GO:0005515; protein binding; Molecular Function GO:0016021; integral to membrane; Cellular Component	NA	Anthrax toxin receptor 1	Uncharacterized protein
chr13	Lcro_GLEAN_10011108	4921259	4922695	0.997729	-	IPR001464; Annexin	GO:0005509; calcium ion binding; Molecular Function GO:0005544; calcium-dependent phospholipid binding; Molecular Function	NA	Galectin-3	StPrP1
chr13	Lcro_GLEAN_10011112	4963398	4966160	1	+	IPR002110; Ankyrin repeat IPR020683; Ankyrin repeat-containing domain	GO:0005515; protein binding; Molecular Function	K09256	NF-kappa-B inhibitor-like protein 1	Uncharacterized protein (Fragment)
chr13	Lcro_GLEAN_10010653	5891265	5894270	0.999242	-	IPR007087; Zinc finger, C2H2-type IPR015880; Zinc finger, C2H2-like	GO:0005622; intracellular; Cellular Component GO:0008270; zinc ion binding; Molecular Function	K09204	Krueppel-like factor 4	Uncharacterized protein (Fragment)
chr13	Lcro_GLEAN_10009635	7297893	7309234	0.879401	+	NA	NA	NA	Bone morphogenetic protein receptor type-1B	Uncharacterized protein (Fragment)
chr13	Lcro_GLEAN_10009636	7310533	7315065	1	+	IPR000333; Activin type II/Transforming growth factor-beta II receptor IPR000472; TGF-beta receptor/activin receptor, type I/II IPR000719; Protein kinase, catalytic domain IPR002290; Serine/threonine-protein kinase domain IPR003605; TGF beta receptor, GS motif IPR017442; Serine/threonine-protein kinase-like domain IPR020635; Tyrosine-protein kinase, catalytic domain	GO:0004672; protein kinase activity; Molecular Function GO:0004674; protein serine/threonine kinase activity; Molecular Function GO:0004675; transmembrane receptor protein serine/threonine kinase activity; Molecular Function GO:0004702; receptor signaling protein serine/threonine kinase activity; Molecular Function GO:0005024; transforming growth factor beta receptor activity; Molecular Function …	K13578 BMPR1B; bone morphogenetic protein receptor type-1B [EC:2.7.11.30] [EC:2.7.11.30] Environmental Information Processing; Signal Transduction; TGF-beta signaling pathway [PATH:ko04350] Environmental Information Processing; Signaling Molecules and Interaction; Cytokine-cytokine receptor interaction [PATH:ko04060]	Bone morphogenetic protein receptor type-1B	Chromosome 4 SCAF14575, whole genome shotgun sequence. (Fragment)
chr13	Lcro_GLEAN_10009640	7540000	7541517	0.99963	-	IPR001111; Transforming growth factor-beta, N-terminal IPR001839; Transforming growth factor-beta, C-terminal IPR015615; Transforming growth factor-beta-related	GO:0008083; growth factor activity; Molecular Function GO:0040007; growth; Biological Process	NA	Bone morphogenetic protein 10	Uncharacterized protein
chr13	Lcro_GLEAN_10009641	7544612	7556421	0.998195	-	IPR000225; Armadillo	GO:0005515; protein binding; Molecular Function	NA	Armadillo repeat protein deleted in velo-cardio-facial syndrome homolog	Chromosome 4 SCAF14575, whole genome shotgun sequence
chr13	Lcro_GLEAN_10010708	8702976	8706105	1	-	IPR002110; Ankyrin repeat IPR020683; Ankyrin repeat-containing domain	GO:0005515; protein binding; Molecular Function	K09256	NF-kappa-B inhibitor-like protein 1	Uncharacterized protein (Fragment)
chr13	Lcro_GLEAN_10016464	9350079	9352185	0.693619	-	IPR003598; Immunoglobulin subtype 2 IPR003599; Immunoglobulin subtype IPR007110; Immunoglobulin-like	GO:0005515; protein binding; Molecular Function	NA	Ciliary neurotrophic factor receptor subunit alpha	Class I helical cytokine receptor number 16
chr13	Lcro_GLEAN_10005789	10178770	10179260	0.99963	+	IPR003596; Immunoglobulin V-set, subgroup IPR003599; Immunoglobulin subtype IPR007110; Immunoglobulin-like IPR013106; Immunoglobulin V-set	GO:0005515; protein binding; Molecular Function	NA	Ig kappa chain V-IV region JI	Uncharacterized protein
chr13	Lcro_GLEAN_10005791	10190992	10192671	0.99924	+	IPR000315; Zinc finger, B-box IPR001841; Zinc finger, RING-type IPR001870; B302/SPRY domain IPR003877; SPla/RYanodine receptor SPRY IPR006574; SPRY-associated IPR018355; SPla/RYanodine receptor subgroup IPR018957; Zinc finger, C3HC4 RING-type	GO:0005515; protein binding; Molecular Function GO:0005622; intracellular; Cellular Component GO:0008270; zinc ion binding; Molecular Function	NA	Tripartite motif-containing protein 16	Uncharacterized protein (Fragment)
chr13	Lcro_GLEAN_10005793	10201717	10203393	0.99948	-	IPR000315; Zinc finger, B-box IPR001841; Zinc finger, RING-type IPR001870; B302/SPRY domain IPR003877; SPla/RYanodine receptor SPRY IPR003879; Butyrophylin-like IPR006574; SPRY-associated IPR018355; SPla/RYanodine receptor subgroup IPR018957; Zinc finger, C3HC4 RING-type	GO:0005515; protein binding; Molecular Function GO:0005622; intracellular; Cellular Component GO:0008270; zinc ion binding; Molecular Function	NA	E3 ubiquitin/ISG15 ligase TRIM25	Uncharacterized protein (Fragment)
chr13	Lcro_GLEAN_10022404	13479398	13485555	1	+	IPR001452; Src homology-3 domain IPR001683; Phox homologous domain IPR011511; Variant SH3 IPR019497; Sorting nexin protein, WASP-binding domain	GO:0005515; protein binding; Molecular Function GO:0007154; cell communication; Biological Process GO:0035091; phosphatidylinositol binding; Molecular Function	NA	Sorting nexin-18	Uncharacterized protein (Fragment)
chr13	Lcro_GLEAN_10022407	13549127	13560173	1	-	IPR002035; von Willebrand factor, type A IPR008399; Anthrax toxin receptor, C-terminal IPR008400; Anthrax toxin receptor, extracellular	GO:0004872; receptor activity; Molecular Function GO:0005515; protein binding; Molecular Function GO:0016021; integral to membrane; Cellular Component	NA	Anthrax toxin receptor 1	Uncharacterized protein
chr13	Lcro_GLEAN_10022415	13784396	13785211	0.99906	+	IPR004031; PMP-22/EMP/MP20/Claudin IPR006187; Claudin	GO:0005198; structural molecule activity; Molecular Function GO:0005923; tight junction; Cellular Component GO:0016020; membrane; Cellular Component	NA	Claudin-23	Uncharacterized protein
chr13	Lcro_GLEAN_10000725	14379240	14389346	0.999767	+	IPR007110; Immunoglobulin-like	GO:0005515; protein binding; Molecular Function	K05056 IL11RA; interleukin 11 receptor alpha K05056 Environmental Information Processing; Signal Transduction; Jak-STAT signaling pathway [PATH:ko04630] Environmental Information Processing; Signaling Molecules and Interaction; Cytokine-cytokine receptor interaction [PATH:ko04060] Organismal Systems; Immune System; Hematopoietic cell lineage [PATH:ko04640]	Interleukin-11 receptor subunit alpha	Uncharacterized protein
chr13	Lcro_GLEAN_10016911	14585914	14602119	0.433536	-	IPR000421; Coagulation factor 5/8 type, C-terminal IPR000922; D-galactoside/L-rhamnose binding SUEL lectin domain IPR001304; C-type lectin IPR004043; LCCL	GO:0005488; binding; Molecular Function GO:0005529; sugar binding; Molecular Function GO:0007155; cell adhesion; Biological Process	NA	Macrophage mannose receptor 1	Uncharacterized protein (Fragment)
[truncated: 528 more rows]

## Sheet: Table S4
Table S4. Detailed information about the distribution of genes involved in hypoxia adaptation. Hypoxia-related genes (195) were identified by BLAST program.
[truncated: 196 more rows]

[truncated: 2 more sheets: Immunity-related genes, Hypoxia-related genes]
